# Supplementary material for: Photocatalyst-free formate-mediated C–O cleavage by the EDA complex and SCS strategy for the synthesis of diaryl 1,4-diketone in air
Source: Royal Society of Chemistry journal article supplement (doi:10.1039/d4ob01913j), 2025-01-01
Supplement: d4ob01913j1.pdf [file d4ob01913j1.pdf]

# Photocatalyst-free formate-mediated aerobic C-O cleavage by EDA complex and SCS strategy for synthesis of diaryl 1,4- diketone

Molai Zhao, Yutong Liu, Min Peng, Yawen Wang, Xiangwei Liu, Hezhong Jiang, Rui Tan\*,  
Jiahong Li\*

*Email: jiahongljh@163.com*

## Contents

|                                                              |    |
|--------------------------------------------------------------|----|
| 1. General information .....                                 | 3  |
| 2. Optimization of the reaction conditions.....              | 3  |
| 3. Application of diaryl 1,4-Diketone .....                  | 6  |
| 4. General procedure for C-C coupling.....                   | 7  |
| 5. Scale up experiment.....                                  | 7  |
| 6. Mechanistic experiments.....                              | 8  |
| 7. Unsuccessful substrates .....                             | 11 |
| 8. Characterization data .....                               | 12 |
| 9. Copies of <sup>1</sup> H NMR and <sup>13</sup> C NMR..... | 18 |
| 10. References.....                                          | 49 |

## 1. General information

Unless otherwise stated, all chemicals were acquired from commercial suppliers and utilized without additional purification. NMR spectra were collected using a JNM-ECZ600R/S1 spectrometer, with  $^1\text{H}$  spectra obtained at 400 MHz and 600 MHz, and  $^{13}\text{C}$  spectra at 100 MHz and 150 MHz. Chemical shifts for  $^1\text{H}$  NMR (at 400 MHz and 600 MHz) were referenced to  $\text{CDCl}_3$  ( $\delta = 7.26$ ). The chemical shifts for  $^{13}\text{C}$  NMR (at 100 MHz and 150 MHz) were referenced to  $\text{CDCl}_3$  ( $\delta = 77.16$ ). Thin-layer chromatography (TLC) was carried out on glass-backed silica plates. Column chromatography was conducted using silica gel (300-400 mesh) and eluted with a mixture of petroleum ether and ethyl acetate (EA/PE = 10/90). Yields were calculated based on isolated compounds obtained after purification.

## 2. Optimization of the reaction conditions

**Table S1.** Optimization of the Reaction Conditions. <sup>a</sup>

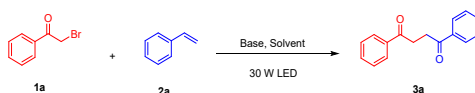

| Entry | Additive                 | Solvent | 30 W LEDs | Yield (%) <sup>b</sup> |
|-------|--------------------------|---------|-----------|------------------------|
| 1     | HCOOCs                   | DMSO    | 410nm     | 86                     |
| 2     | HCOOCs                   | DMSO    | 420nm     | 75                     |
| 3     | HCOOCs                   | DMSO    | 430nm     | 67                     |
| 4     | HCOOCs                   | DMSO    | 440nm     | 42                     |
| 5     | HCOOCs                   | DMSO    | 455nm     | 31                     |
| 6     | HCOOCs                   | MeCN    | 410nm     | NR                     |
| 7     | HCOOCs                   | EtOH    | 410nm     | NR                     |
| 8     | HCOOCs                   | Tol     | 410nm     | NR                     |
| 9     | HCOOCs                   | Acetone | 410nm     | NR                     |
| 10    | HCOOCs                   | DMF     | 410nm     | 11                     |
| 11    | HCOOCs                   | DMA     | 410nm     | 17                     |
| 12    | $\text{Et}_3\text{N}$    | DMSO    | 410nm     | trace                  |
| 13    | DIPEA                    | DMSO    | 410nm     | trace                  |
| 14    | DABCO                    | DMSO    | 410nm     | 10                     |
| 15    | $\text{Cs}_2\text{CO}_3$ | DMSO    | 410nm     | NR                     |
| 16    | NaOH                     | DMSO    | 410nm     | NR                     |
| 17    | KOH                      | DMSO    | 410nm     | NR                     |
| 18    | $\text{K}_3\text{PO}_4$  | DMSO    | 410nm     | NR                     |
| 19    | HCOOK                    | DMSO    | 410nm     | trace                  |

|                 |                        |      |       |       |
|-----------------|------------------------|------|-------|-------|
| 20              | HCOONa                 | DMSO | 410nm | trace |
| 21              | HCOONH <sub>4</sub>    | DMSO | 410nm | 62    |
| 22              | (HCOO) <sub>2</sub> Ca | DMSO | 410nm | 43    |
| 23 <sup>c</sup> | HCOOCs                 | DMSO | 410nm | trace |
| 24 <sup>d</sup> | HCOOCs                 | DMSO | 410nm | trace |

<sup>a</sup>Reaction conditions: **1a** (1.0 mmol, 1.0 equiv), **2a** (1.0 mmol, 1.0 equiv), base (4.0 mmol, 4.0 equiv), solvent (4 mL), under air and room temperature conditions, illuminated by a 30 W LED lamp for 15 hours in air. NR: No reaction. <sup>b</sup>Isolated yield. <sup>c</sup>Under dark condition. <sup>d</sup>Under N<sub>2</sub>.

**Table S2** Effects of light<sup>a,b</sup>

| Entry    | Conditions    | Yield (%) <sup>b</sup> |
|----------|---------------|------------------------|
| <b>1</b> | <b>410 nm</b> | <b>86</b>              |
| 2        | 420 nm        | 75                     |
| 3        | 430 nm        | 67                     |
| 4        | 440 nm        | 42                     |
| 5        | 455 nm        | 31                     |

<sup>a</sup>Reaction conditions: **1a** (1.0 mmol, 1.0 equiv), **2a** (1.0 mmol, 1.0 equiv), base (4.0 mmol, 4.0 equiv), solvent (4 mL), under air and room temperature conditions, illuminated by a 30 W LED lamp for 15 hours. <sup>b</sup>Isolated yield.

**Table S3** Effects of additive<sup>a,b</sup>

| Entry    | Additive                        | Yield (%) <sup>b</sup> |
|----------|---------------------------------|------------------------|
| <b>1</b> | <b>HCOOCs</b>                   | <b>86</b>              |
| 2        | Et <sub>3</sub> N               | NR                     |
| 3        | DIPEA                           | trace                  |
| 4        | DABCO                           | 10                     |
| 5        | Cs <sub>2</sub> CO <sub>3</sub> | NR                     |
| 6        | NaOH                            | NR                     |
| 7        | KOH                             | NR                     |
| 8        | K <sub>3</sub> PO <sub>4</sub>  | NR                     |

<sup>a</sup>Reaction conditions: **1a** (1.0 mmol, 1.0 equiv), **2a** (1.0 mmol, 1.0 equiv), base (4.0 mmol, 4.0 equiv), solvent (4 mL), under air and room temperature conditions, illuminated by a 30 W 410 nm LED lamp for 15 hours. <sup>b</sup>Isolated yield.

**Table S4** Effects of solvent<sup>a,b</sup>

| Entry    | conditions  | Yield (%) <sup>b</sup> |
|----------|-------------|------------------------|
| <b>1</b> | <b>DMSO</b> | <b>86</b>              |
| 2        | MeCN        | NR <sup>c</sup>        |

|   |         |    |
|---|---------|----|
| 3 | EtOH    | NR |
| 4 | Tol     | NR |
| 5 | Acetone | NR |
|   | M       | 11 |
| 7 | DMA     | 17 |

<sup>a</sup>Reaction conditions: **1a** (1.0 mmol, 1.0 equiv), **2a** (1.0 mmol, 1.0 equiv), base (4.0 mmol, 4.0 equiv), solvent (4 mL), under air and room temperature conditions, illuminated by a 30 W 410 nm LED lamp for 15 hours. <sup>b</sup>Isolated yield.

**Table S5** Effect of cesium formate dosage<sup>a,b</sup>

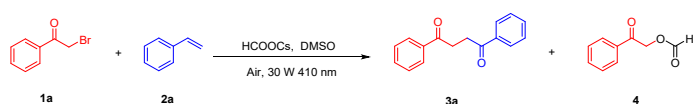

| Entry | Equiv of HCOOCs | Yield of <b>3a</b> (%) | Yield of <b>4</b> (%) |
|-------|-----------------|------------------------|-----------------------|
| 1     | 1               | 0                      | 96                    |
| 2     | 2               | 55                     | 27                    |
| 3     | 4               | 86                     | 0                     |
| 4     | 6               | 87                     | 0                     |

<sup>a</sup>Reaction conditions: **1a** (1.0 mmol, 1.0 equiv), **2a** (1.0 mmol, 1.0 equiv), HCOOCs, 4 mL DMSO, under air and room temperature conditions, illuminated with a 30 W 410 nm LED lamp for 15 hours. <sup>b</sup>Isolated yield.

**Table S6** Effect of formate types<sup>a,b</sup>

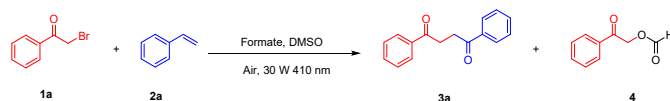

| Entry | Formate                | Yield of <b>3a</b> (%) | Yield of <b>4</b> (%) |
|-------|------------------------|------------------------|-----------------------|
| 1     | HCOOCs                 | 86                     | trace                 |
| 2     | HCOOK                  | trace                  | 96                    |
| 3     | HCOONa                 | trace                  | 98                    |
| 4     | HCOONH <sub>4</sub>    | 62                     | trace                 |
| 5     | (HCOO) <sub>2</sub> Ca | 43                     | 21                    |

<sup>a</sup>Reaction conditions: **1a** (1.0 mmol, 1.0 equiv), **2a** (1.0 mmol, 1.0 equiv), Formate (1.0 mmol, 4.0 equiv), 4 mL DMSO, illuminated with 30W 410nm LED lamp for 15 hours under air and room temperature conditions. <sup>b</sup>Isolated yield.

### 3. Application of diaryl 1,4-Diketone<sup>1</sup>

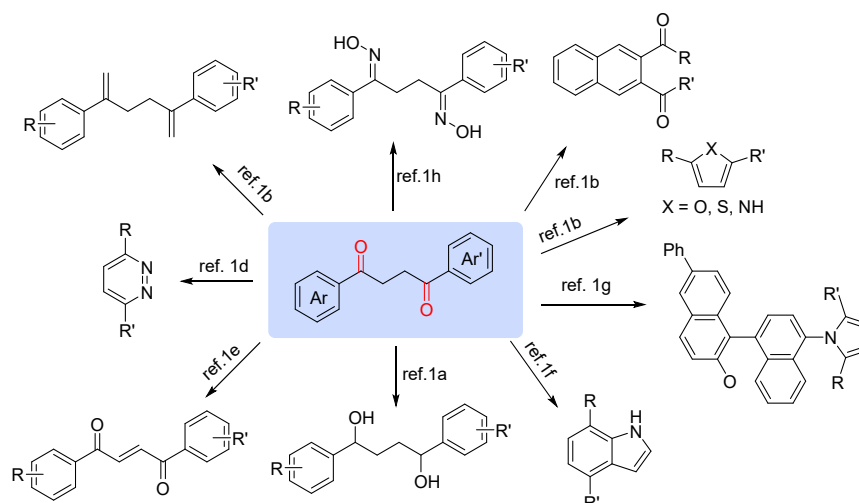

**Scheme S1.** Application of diaryl 1,4-diketone reported by literatures

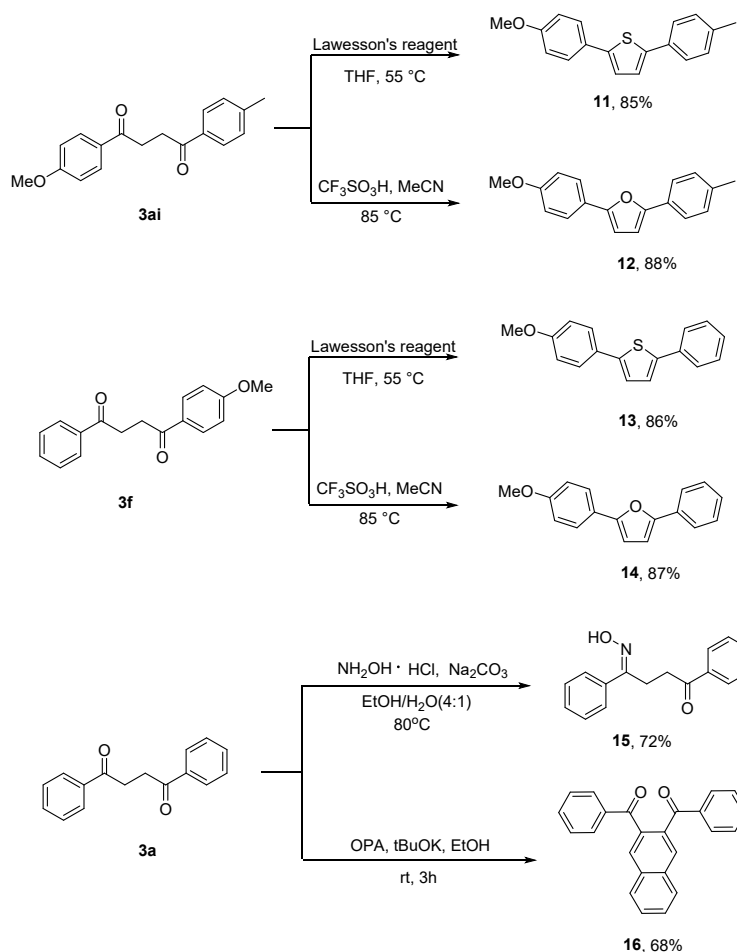

**Scheme 5.** The conversion of diaryl 1,4-diketone compounds by us

We explored the application of this method through corresponding studies, as demonstrated below in **Scheme 5**. The advantage of our method is that it can synthesize not only the symmetric 1,4-diketones, but also the asymmetric ones. So, We selected symmetric and asymmetric products

for conversion studies. First, we performed the corresponding transformation using an asymmetric substrate **3ai** under the action of Lawesson's reagent, the cyclization product **11** was obtained in high yield. Another cyclization product **12** was obtained in the presence of trifluoromethanesulfonic acid. Similarly, using **3f** as the starting material, products **13** and **14** were obtained respectively. Subsequently, we selected the symmetric substrate **3a** and added hydroxylamine hydrochloride to achieve the oxime etherification of one carbonyl group and get the compound **15**. Then, under the simultaneous action of *o*-phthalaldehyde and *t*-BuOK, we obtained compound **16**. The corresponding information has been included in the revised manuscript and Supporting Information.

#### 4. General procedure for C–C coupling

In a reaction bottle with a magnetic stirrer,  $\alpha$ -Bromophenone (0.25 mmol 50 mg), styrene (29.0  $\mu$  L) and cesium formate (1 mmol) was added into. Then add solvent DMSO (4 mL) and cap the bottle. Move the reaction bottle on a magnetic stirrer and irradiate it with 410 nm 30W LED at room temperature under an air atmosphere for 6 hours. Add pure water (5 mL) and EA (20 mL) for extraction, dry the combined organic phase with Na<sub>2</sub>SO<sub>4</sub>, filter and concentrate. The product 1,2-benzoyl ethane (**3a**) was isolated by flash chromatography on 300-400 mesh silica gel with PE/EA.

#### 5. Scale up experiment

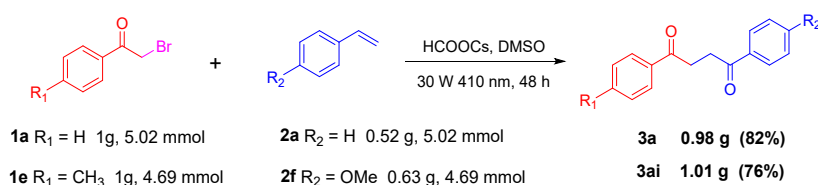

**Scheme S3.** Gram-scale synthesis

In a reaction bottle with a magnetic stirrer,  $\alpha$ -Bromophenone (5 mmol 1 g), styrene (0.58 mL) and cesium formate (3.56 g) was added into. Then add solvent DMSO (20 mL) and cap the bottle. Move the reaction bottle on a magnetic stirrer and irradiate it with 410 nm 30W LED at room temperature under an air atmosphere for 48 hours. Add pure water (10 mL) and EA (60 mL) for extraction, dry the combined organic phase with Na<sub>2</sub>SO<sub>4</sub>, filter and concentrate. The product 1,2-benzoyl ethane (**3a**) was isolated by flash chromatography on 300-400 mesh silica gel with PE/EA (12.5/1(v/v)). The same applies to the synthesis of 1-(4-methoxyphenyl)-4-(*p*-tolyl)butane-1,4-dione.

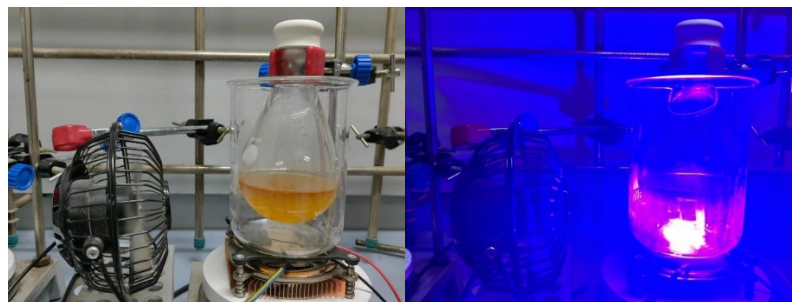

**Figure S1** Reaction apparatus

## 6. Mechanistic experiments

### 6.1 NMR experiment

NMR experiment : Solutions containing equal molar concentrations of the **4** (0.02 M in DMSO- $d_6$ ) and the HCOOCs(0.08 M in DMSO- $d_6$ ) were prepared and mixed to cover acceptor/donor ratio from 0.2:0.8, 0.5:0.5 to 0.8:0.2.

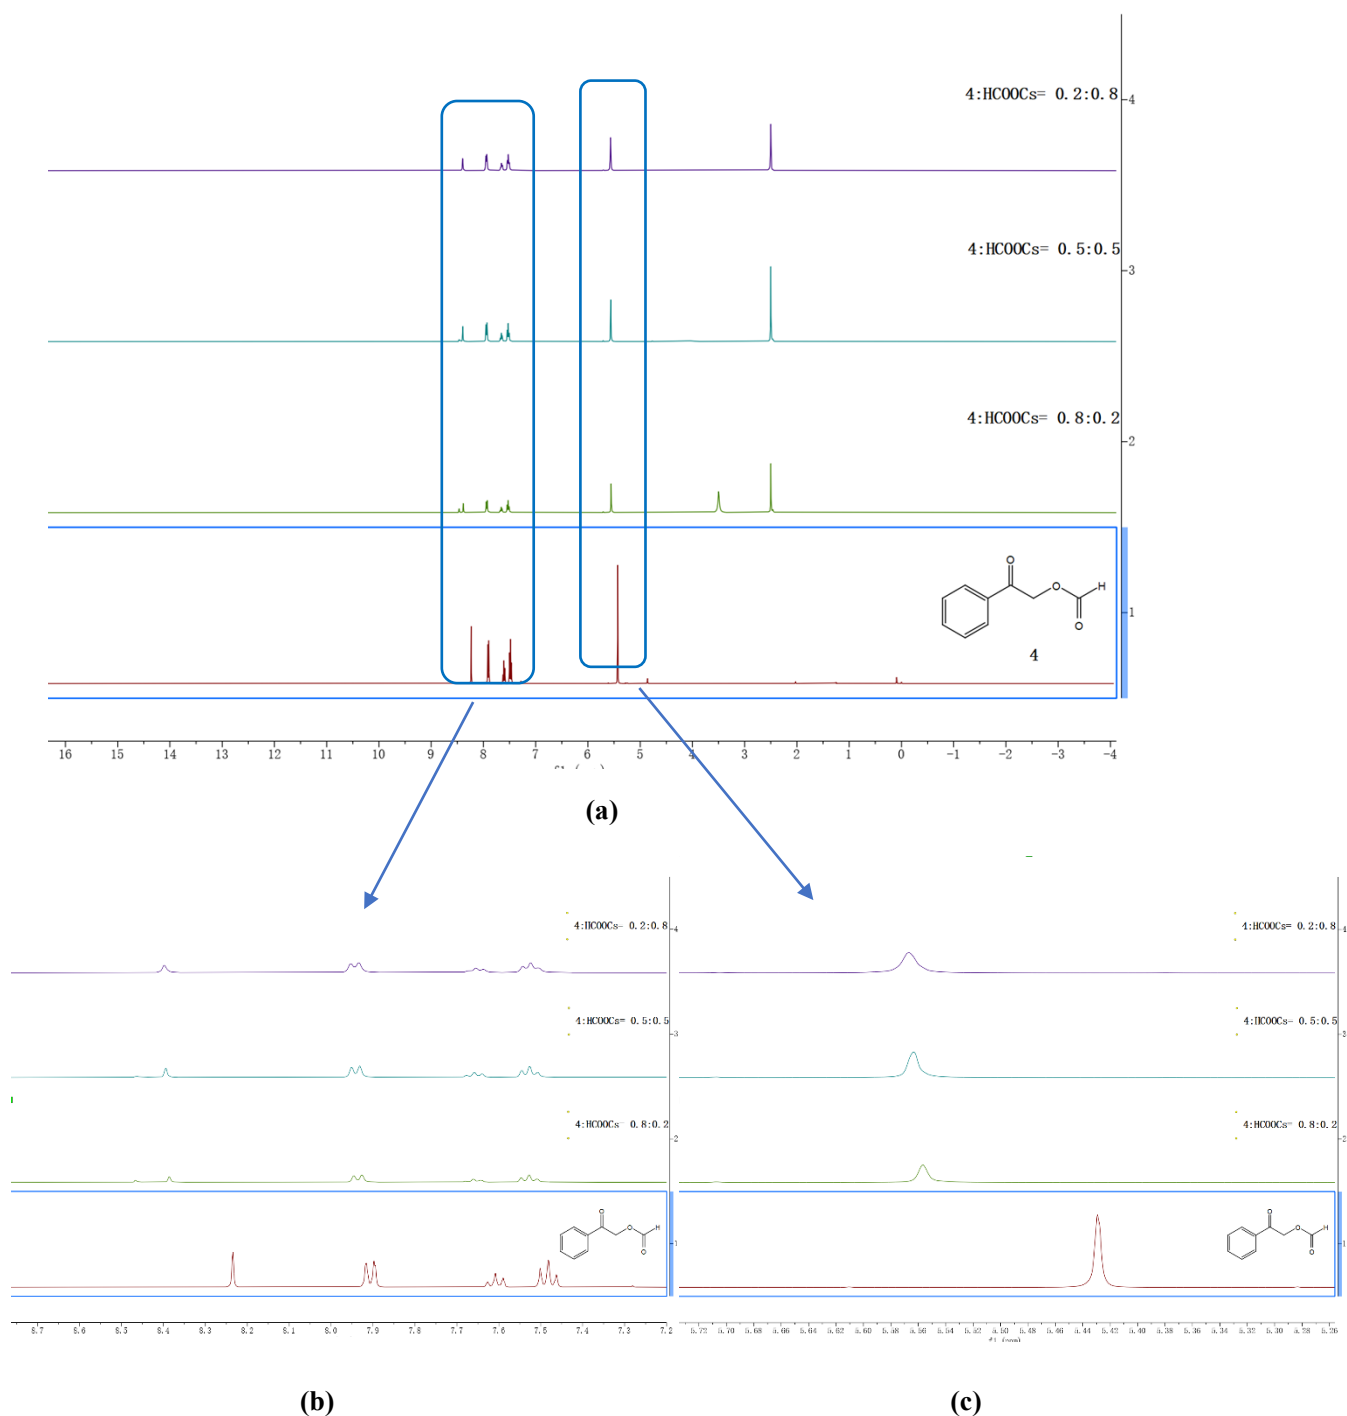

Figure S2 NMR study of mixture intermediate **4** and HCOOCs in DMSO- $d_6$

## 6.2 Radical trapping experiments

We conducted radical trapping experiments by adding TEMPO and BHT separately. HRMS tests confirmed the presence of the TEMPO radical adducts.

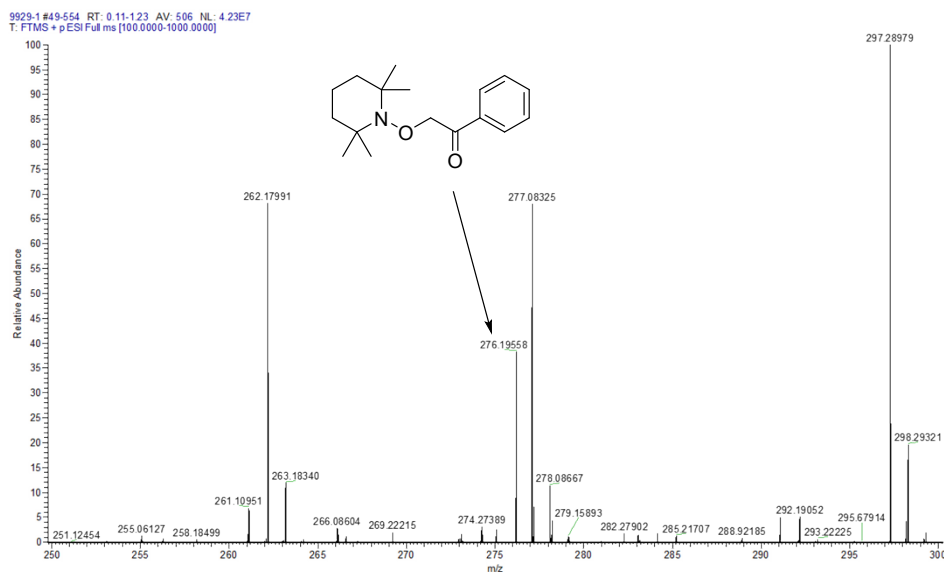

TEMPO-adduct: HRMS (ESI) calcd for  $[M + H]^+$ :  $C_{17}H_{15}NO_2$  276.1963, found 276.1956.

**Figure S3** High-resolution mass spectrometry of radical trapping experiment

### a) ESR tests

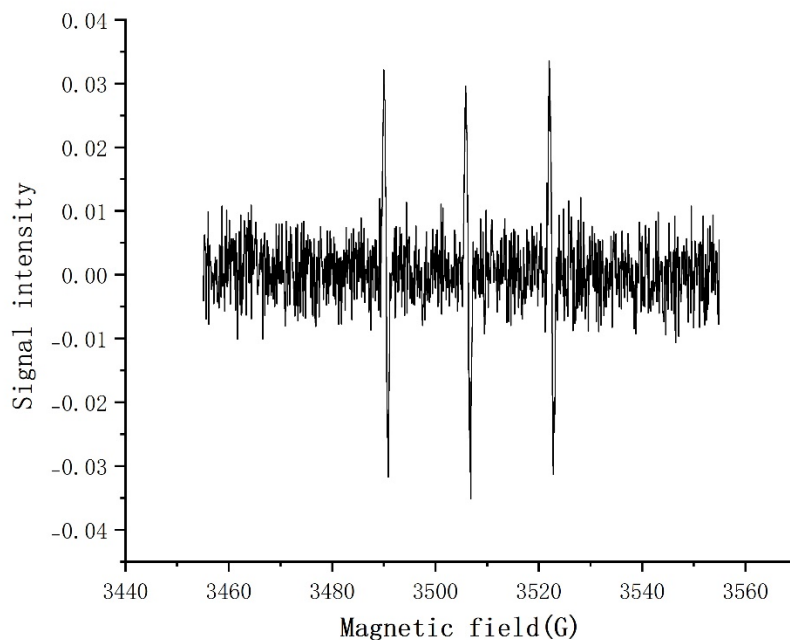

(a) In the presence of TEMP (singlet oxygen<sup>2</sup>)



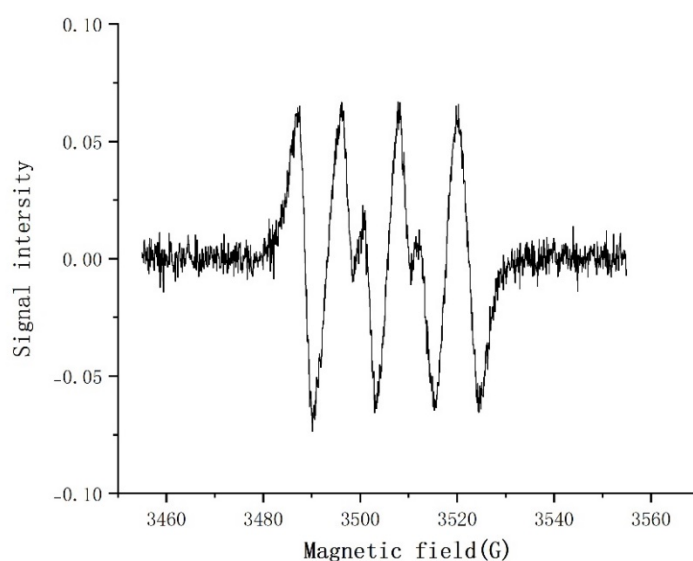

(b) In the presence of DMPO (superoxide anion<sup>3</sup>)

**Figure S4** ESR experiments

To understand the role of oxygen in this reaction, we conducted electron spin resonance (ESR) experiments. TEMP was added to a mixture of intermediate **4**, styrene, and HCOOCs, and the mixture was irradiated by Blue Led for 10 s for ESR testing. The results indicate the presence of  $^1\text{O}_2$ . In another experiment, DMPO was added as a radical scavenger to a mixture of intermediate **4**, styrene, and HCOOCs, and the  $\text{O}_2^{\cdot-}$  signal was observed. The possible mechanism for the generation of reactive oxygen species and carbon dioxide radical anions from DMSO-HCOOM- $\text{O}_2$  under illumination conditions has been reported by Li (Scheme S3).<sup>4</sup>

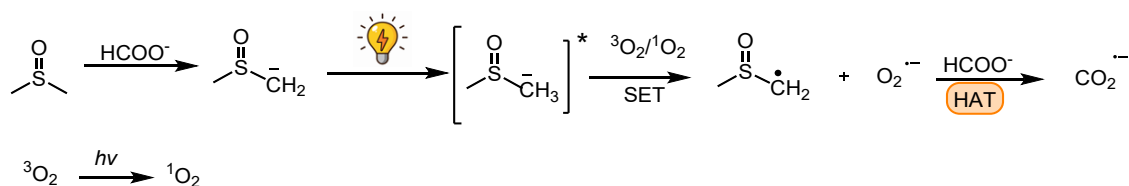

**Scheme S4** The possible mechanism for the generation of reactive oxygen species and carbon dioxide radical anions from DMSO-HCOOM- $\text{O}_2$  under illumination conditions.<sup>4</sup>

### 6.3 UV-visible wavelength scanning

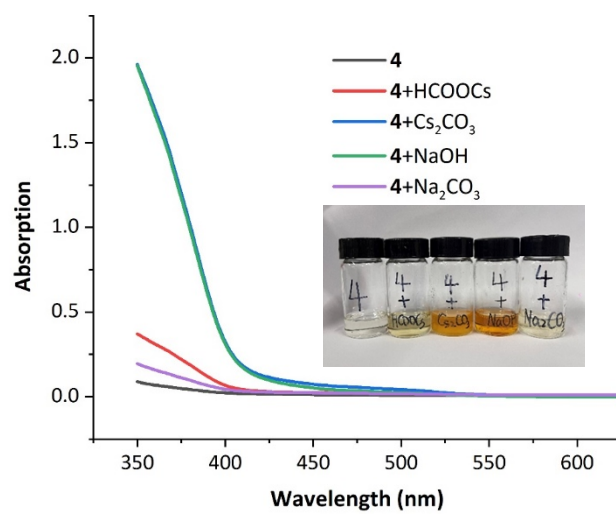

Figure S5 UV-visible wavelength scanning-different base

## 7. Unsuccessful substrates

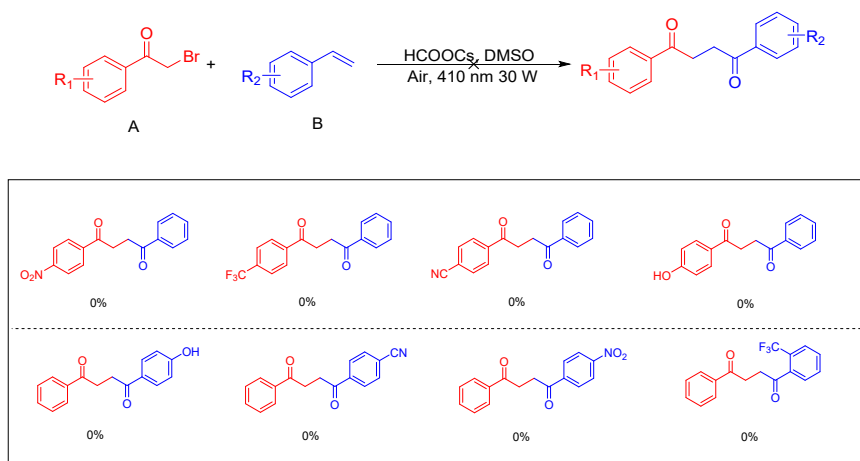

Unsuccessful examples

## 8. Characterization data

The known compounds are as follows **3a-3g**<sup>1f, 5</sup>, **3i-3j**, **3l-3q**<sup>5a, 6</sup>, **3r-3ab**<sup>1f, 5a</sup>, **3ad**<sup>7</sup>, **11-14**<sup>8</sup>, **16**<sup>9</sup> and the spectroscopic datas matched literature values.

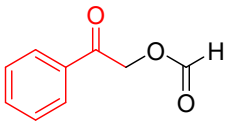**2-oxo-2-phenylethyl formate(4)** Yellow oil. <sup>1</sup>H NMR (400 MHz, Chloroform-*d*) δ 8.21 (s, 1H), 7.89 (d, *J* = 6.8 Hz, 2H), 7.59 (t, *J* = 7.4 Hz, 1H), 7.46 (t, *J* = 7.8 Hz, 2H), 5.41 (d, *J* = 0.9 Hz, 2H). <sup>13</sup>C NMR (100 MHz, Chloroform-*d*) δ 191.3, 160.2, 134.2, 129.1, 127.9, 127.8, 65.5.

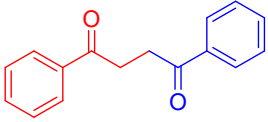**1,4-diphenylbutane-1,4-dione(3a)** 204 mg, 86% yield, white solid. M.p.: 140–142 °C. <sup>1</sup>H NMR (400 MHz, Chloroform-*d*) δ 8.04 (d, *J* = 7.2 Hz, 4H), 7.58 (t, *J* = 7.3 Hz, 2H), 7.48 (t, *J* = 7.5 Hz, 4H), 3.47 (s, 4H). <sup>13</sup>C NMR (100 MHz, Chloroform-*d*) δ 198.8, 136.9, 133.3, 128.7, 128.3, 32.7.

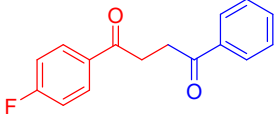**1-(4-fluorophenyl)-4-phenylbutane-1,4-dione (3b, 215 mg, 84% yield; 3v 198 mg, 79% yield)**, white solid. M.p.: 96–98 °C. <sup>1</sup>H NMR (400 MHz, Chloroform-*d*) δ 8.12 – 8.00 (m, 4H), 7.58 (t, *J* = 7.4 Hz, 1H), 7.48 (t, *J* = 7.7 Hz, 2H), 7.15 (t, *J* = 8.6 Hz, 2H), 3.50 – 3.41 (m, 4H). <sup>13</sup>C NMR (150 MHz, Chloroform-*d*) δ 198.7, 197.3, 166.0 (d, *J* = 253.0 Hz), 136.9, 133.4, 133.4 (d, *J* = 3.0 Hz), 130.9 (d, *J* = 9.3 Hz), 128.8, 128.3, 115.8 (d, *J* = 21.6 Hz), 32.7, 32.6.

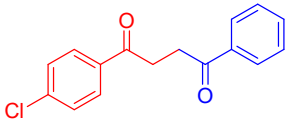**1-(4-chlorophenyl)-4-phenylbutane-1,4-dione (3c, 220 mg, 81% yield; 3w 210 mg, 80% yield)**, white solid. M.p.: 42–44 °C. <sup>1</sup>H NMR (400 MHz, Chloroform-*d*) δ 8.03 (d, *J* = 7.0 Hz, 2H), 7.98 (d, *J* = 8.6 Hz, 2H), 7.58 (t, *J* = 7.4 Hz, 1H), 7.48 (dd, *J* = 14.1, 8.3 Hz, 4H), 3.44 (dd, *J* = 12.7, 5.9 Hz, 4H). <sup>13</sup>C NMR (100 MHz, Chloroform-*d*) δ 198.7, 197.7, 139.8, 136.8, 135.3, 133.4, 129.7, 129.1, 128.8, 128.3, 32.7, 32.7.

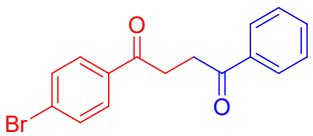**1-(4-bromophenyl)-4-phenylbutane-1,4-dione (3d, 273 mg, 86% yield; 3x 200 mg, 77% yield)**, white solid. M.p.: 113–115 °C. <sup>1</sup>H NMR (400 MHz, Chloroform-*d*) δ 8.03 (d, *J* = 7.1 Hz, 2H), 7.91 (d, *J* = 8.5 Hz, 2H), 7.63 (d, *J* = 8.6 Hz, 2H), 7.58 (d, *J* = 7.3 Hz, 1H), 7.48 (t, *J* = 7.5 Hz, 2H), 3.46 (d, *J* = 5.1 Hz, 2H), 3.42 (d, *J* = 5.1 Hz, 2H). <sup>13</sup>C NMR (100 MHz, Chloroform-*d*) δ 198.7, 197.9, 136.8, 135.7, 133.4, 132.1, 129.8, 128.8, 128.5, 128.3, 32.7, 32.7.

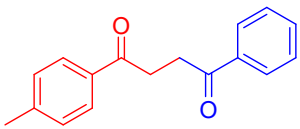**1-phenyl-4-(p-tolyl)butane-1,4-dione (3e, 224 mg, 89% yield; 3y 236 mg, 84% yield)**, white solid. M.p.: 113–115 °C. <sup>1</sup>H NMR (400 MHz, Chloroform-*d*) δ 8.04 (d, *J* = 7.0 Hz, 2H), 7.94 (d, *J* = 8.2 Hz, 2H), 7.58 (t, *J* = 7.4 Hz, 1H), 7.48 (t, *J* = 7.5 Hz, 2H), 7.28 (d, *J* = 7.9 Hz, 2H), 3.45 (d, *J* = 1.8 Hz, 4H), 2.42 (s, 3H). <sup>13</sup>C NMR (100 MHz, Chloroform-*d*) δ 199.0, 198.5, 144.1, 137.0, 134.5, 133.3, 129.4, 128.7, 128.4, 128.3, 32.8, 32.6, 21.8.

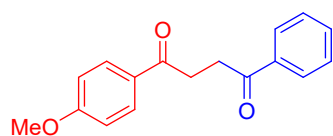

#### 1-(4-methoxyphenyl)-4-phenylbutane-1,4-dione

(**3f**, 246 mg, 92% yield; **3s** 227 mg, 81% yield), white solid. M.p.: 98–100 °C. <sup>1</sup>H NMR (400 MHz, Chloroform-*d*) δ 8.08 – 7.98 (m, 4H), 7.57 (t, *J* = 7.4 Hz, 1H), 7.48 (t, *J* = 7.6 Hz, 2H), 6.95 (d, *J* = 8.9 Hz, 2H), 3.88 (s, 3H), 3.49 – 3.37 (m, 4H). <sup>13</sup>C NMR (100 MHz, Chloroform-*d*) δ 199.0, 197.4, 163.7, 137.0, 133.2, 130.5, 130.0, 128.7, 128.3, 113.9, 55.6, 32.8, 32.4.

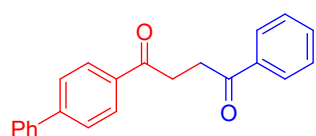

#### 1-([1,1'-biphenyl]-4-yl)-4-phenylbutane-1,4-dione

(**3g**, 251 mg, 80% yield; **3z** 200 mg, 79% yield), white solid. M.p.: 99-101 °C. <sup>1</sup>H NMR (400 MHz, Chloroform-*d*) δ 8.12 (d, *J* = 8.4 Hz, 2H), 8.06 (d, *J* = 7.1 Hz, 2H), 7.71 (d, *J* = 8.4 Hz, 2H), 7.66 – 7.62 (m, 2H), 7.58 (t, *J* = 7.1 Hz, 1H), 7.51 – 7.45 (m, 4H), 7.42 – 7.40 (m, 1H), 3.50 (s, 4H). <sup>13</sup>C NMR (100 MHz, Chloroform-*d*) δ 198.9, 146.0, 140.1, 135.7, 133.3, 129.1, 128.9, 128.8, 128.4, 128.3, 127.5, 127.4, 32.8, 32.8.

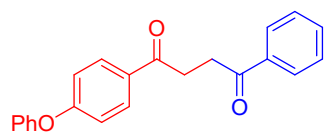

#### 1-(4-phenoxyphenyl)-4-phenylbutane-1,4-dione(**3h**)

(**3h**, 270 mg, 82% yield; **3aa** 160 mg, 80% yield), white solid. M.p.: 113-115 °C. <sup>1</sup>H NMR (400 MHz, Chloroform-*d*) δ 8.07 – 7.98 (m, 4H), 7.52 – 7.35 (m, 4H), 7.11 – 6.98 (m, 4H), 3.44 (tt, *J* = 10.3, 5.0 Hz, 4H). <sup>13</sup>C NMR (100 MHz, Chloroform-*d*) δ 198.9, 197.4, 162.2, 155.7, 136.9, 133.3, 131.6, 130.5, 130.2, 128.7, 128.3, 124.7, 120.3, 117.5, 32.8, 32.5. HRMS (ESI) calcd for [M + H<sup>+</sup>]: C<sub>22</sub>H<sub>19</sub>O<sub>3</sub> 331.1328, found 331.1330

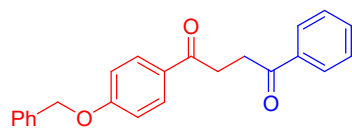

#### 1-(4-iodine)- 4-(phenylmethoxy)phenyl-1,4-dione(**3i**)

230 mg, 82% yield, white solid. M.p.: 80-82 °C. <sup>1</sup>H NMR (400 MHz, Chloroform-*d*) δ 8.03 (t, *J* = 7.7 Hz, 4H), 7.57 (t, *J* = 7.4 Hz, 1H), 7.51 – 7.34 (m, 7H), 7.03 (d, *J* = 8.9 Hz, 2H), 5.15 (s, 2H), 3.48 – 3.38 (m, 4H). <sup>13</sup>C NMR (100 MHz, Chloroform-*d*) δ 199.2, 197.5, 160.1, 133.3, 130.6, 130.1, 128.9, 128.7, 128.4, 128.3, 127.6, 114.8, 70.3, 32.9, 32.4.

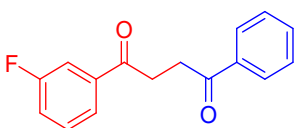

#### 1-(3-fluorophenyl)-4-phenylbutane-1,4-dione

(**3j**, 220 mg, 86% yield; **3ae** 208 mg, 83% yield), white solid. M.p.: 100-102 °C. <sup>1</sup>H NMR (400 MHz, Chloroform-*d*) δ 7.69 (d, *J* = 7.8 Hz, 2H), 7.63 (dt, *J* = 9.0, 2.1 Hz, 2H), 7.50 (td, *J* = 8.0, 5.4 Hz, 2H), 7.38 – 7.33 (m, 3H), 4.86 (s, 4H). <sup>13</sup>C NMR (100 MHz, Chloroform-*d*) δ 198.6, 197.6, 163.0 (d, *J* = 246.4 Hz), 139.0 (d, *J* = 6.1 Hz), 136.8, 133.4, 130.4 (d, *J* = 7.6 Hz), 128.8, 128.3, 124.0 (d, *J* = 3.0 Hz), 120.3 (d, *J* = 21.4 Hz), 115.0 (d, *J* = 22.1 Hz), 32.9, 32.7.

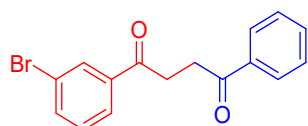

#### 1-(3- bromophenyl)-4-phenylbutane-1,4-dione(**3k**)

225 mg, 68% yield, white solid. M.p.: 82-84 °C. <sup>1</sup>H NMR (400 MHz, Chloroform-

d)  $\delta$  8.16 (t,  $J$  = 1.9 Hz, 1H), 8.03 (d,  $J$  = 7.1 Hz, 2H), 7.96 (dt,  $J$  = 7.8, 1.4 Hz, 1H), 7.70 (ddd,  $J$  = 8.0, 2.1, 1.0 Hz, 1H), 7.58 (t,  $J$  = 7.4 Hz, 1H), 7.48 (t,  $J$  = 7.6 Hz, 2H), 7.36 (t,  $J$  = 7.9 Hz, 1H), 3.44 (ddd,  $J$  = 15.6, 5.1, 1.0 Hz, 4H).  $^{13}\text{C}$  NMR (100 MHz, Chloroform-*d*)  $\delta$  198.5, 197.5, 138.7, 136.8, 136.1, 133.4, 131.4, 130.4, 128.8, 128.3, 126.8, 123.1, 32.8, 32.7. HRMS (ESI) calcd for  $[\text{M} + \text{H}^+]$ :  $\text{C}_{16}\text{H}_{14}\text{BrO}_2$  317.0172, found 317.0169

**1-(3-methyl)-4-phenylbutane-1,4-dione**

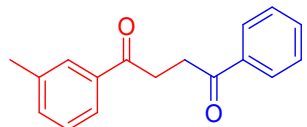

(**3l**, 230 mg, 83% yield; **3af** 190 mg, 76% yield), white solid.

M.p.: 76-78 °C.  $^1\text{H}$  NMR (400 MHz, Chloroform-*d*)  $\delta$  8.07 – 8.01 (m, 2H), 7.84 (d,  $J$  = 6.4 Hz, 2H), 7.58 (t,  $J$  = 7.4 Hz, 1H), 7.48 (t,  $J$  = 7.7 Hz, 2H), 7.37 (d,  $J$  = 7.9 Hz, 2H), 3.46 (d,  $J$  = 1.4 Hz, 4H), 2.42 (s, 3H).  $^{13}\text{C}$  NMR (100 MHz, Chloroform-*d*)  $\delta$  199.1, 198.9, 138.5, 137.0, 134.1, 133.3, 128.8, 128.7, 128.6, 128.3, 125.5, 32.8, 21.5.

**1-(3-methoxyphenyl)-4-phenylbutane-1,4-dione(3m)** 246 mg, 92%

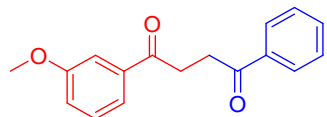

yield, white solid. M.p.: 76-78 °C.  $^1\text{H}$  NMR (400 MHz, Chloroform-*d*)  $\delta$  8.04 (d,  $J$  = 7.0 Hz, 2H), 7.64 (d,  $J$  = 7.7 Hz, 1H), 7.59 (d,  $J$  =

7.4 Hz, 1H), 7.57 – 7.53 (m, 1H), 7.48 (t,  $J$  = 7.6 Hz, 2H), 7.39 (t,  $J$  = 7.9 Hz, 1H), 7.13 (ddd,  $J$  = 8.2, 2.7, 1.0 Hz, 1H), 3.86 (s, 3H), 3.46 (s, 4H).  $^{13}\text{C}$  NMR (100 MHz, Chloroform-*d*)  $\delta$  198.8, 198.7, 160.0, 138.3, 136.9, 133.3, 129.8, 128.8, 128.3, 121.0, 119.9, 112.4, 55.6, 32.9, 32.8.

**1-(2-methoxyphenyl)-4-phenylbutane-1,4-dione**

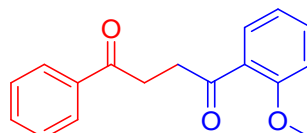

(**3n**, 200 mg, 69% yield; **3ab** 216 mg, 77% yield), colorless

liquid.  $^1\text{H}$  NMR (400 MHz, Chloroform-*d*)  $\delta$  8.03 (d,  $J$  = 7.2 Hz, 2H), 7.77 (dd,  $J$  = 7.7, 1.9 Hz, 1H), 7.57 (t,  $J$  = 7.3 Hz, 1H), 7.47 (t,  $J$  = 7.6 Hz, 3H), 7.08 – 6.94 (m, 2H), 3.93 (s, 3H), 3.44 (dd,  $J$  = 16.3, 5.4 Hz, 4H).  $^{13}\text{C}$  NMR (100 MHz, Chloroform-*d*)  $\delta$  200.8, 199.2, 159.0, 137.2, 133.7, 133.1, 130.7, 128.7, 128.3, 128.1, 120.8, 111.8, 55.7, 38.1, 33.2.

**1-(naphthalen-2-yl)-4-phenylbutane-1,4-dione**

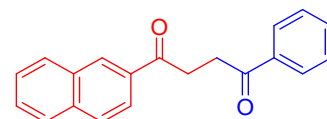

(**3o**, 216 mg, 75% yield; **3ai** 218 mg, 84% yield), white solid. M.p.:

146-148 °C.  $^1\text{H}$  NMR (400 MHz, Chloroform-*d*)  $\delta$  8.59 (d,  $J$  = 1.7 Hz, 1H), 8.16 – 8.03 (m, 3H), 8.02 – 7.95 (m, 1H), 7.90 (dd,  $J$  = 9.9, 7.8 Hz, 2H), 7.66 – 7.53 (m, 3H), 7.49 (t,  $J$  = 7.6 Hz, 2H), 3.61 (dd,  $J$  = 7.4, 6.0 Hz, 2H), 3.53 (dd,  $J$  = 6.8, 5.3 Hz, 2H).  $^{13}\text{C}$  NMR (100 MHz, Chloroform-*d*)  $\delta$  198.9, 198.8, 137.0, 135.8, 134.3, 133.3, 132.7, 130.0, 129.8, 128.8, 128.6, 128.3, 127.9, 126.9, 124.0, 32.9, 32.8.

**1-(benzo[d][1,3]dioxol-5-yl)-4-phenylbutane-1,4-dione(3p)** 231

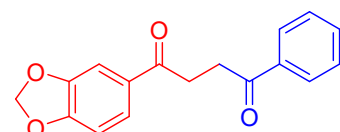

mg, 82% yield, white solid. M.p.: 132-134 °C.  $^1\text{H}$  NMR (400 MHz,

Chloroform-*d*)  $\delta$  8.04 (d,  $J$  = 6.9 Hz, 2H), 7.67 (dd,  $J$  = 8.2, 1.7 Hz, 1H), 7.58 (t,  $J$  = 7.4 Hz, 1H), 7.52 – 7.38 (m, 3H), 6.87 (d,  $J$  = 8.2

Hz, 1H), 6.05 (s, 2H), 3.49 – 3.35 (m, 4H). <sup>13</sup>C NMR (100 MHz, Chloroform-*d*) δ 198.9, 196.9, 152.0, 148.3, 137.0, 133.3, 131.8, 128.7, 128.3, 124.5, 108.1, 108.1, 102.0, 32.9, 32.5.

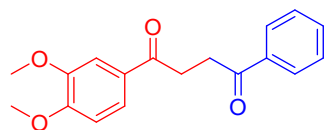

**1-(3,4-dimethoxyphenyl)-4-phenylbutane-1,4-dione(3q)** 247

mg, 83% yield, white solid. M.p.: 79-81 °C. <sup>1</sup>H NMR (400 MHz, Chloroform-*d*) δ 8.04 (d, *J* = 7.0 Hz, 2H), 7.70 (dd, *J* = 8.4, 2.0 Hz, 1H), 7.56 (d, *J* = 2.1 Hz, 2H), 7.47 (t, *J* = 7.7 Hz, 2H), 6.91 (d, *J* =

8.4 Hz, 1H), 3.94 (d, *J* = 8.5 Hz, 6H), 3.43 (s, 4H). <sup>13</sup>C NMR (100 MHz, Chloroform-*d*) δ 199.1, 197.4, 153.5, 149.1, 137.0, 133.3, 130.2, 128.7, 128.3, 122.9, 110.3, 110.2, 56.2, 56.1, 32.9, 32.3.

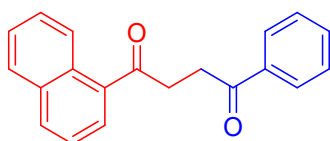

**1-(naphthalen-1-yl)-4-phenylbutane-1,4-dione(3r)** 227 mg, 79%

yield, white solid. M.p.: 77-78 °C. <sup>1</sup>H NMR (400 MHz, Chloroform-*d*) δ 8.60 (dd, *J* = 8.5, 1.2 Hz, 1H), 8.07 (ddd, *J* = 7.2, 3.0, 1.2 Hz, 3H), 8.00 (d, *J* = 8.2 Hz, 1H), 7.88 (dd, *J* = 8.1, 1.6 Hz,

1H), 7.62 – 7.46 (m, 6H), 3.60 – 3.48 (m, 4H). <sup>13</sup>C NMR (100 MHz, Chloroform-*d*) δ 203.0, 198.8, 137.0, 136.2, 134.1, 133.3, 132.7, 130.3, 128.8, 128.5, 128.3, 128.0, 127.8, 126.6, 126.0, 124.6, 36.1, 33.2.

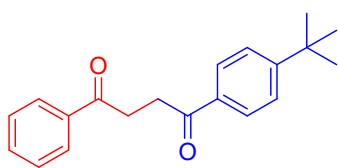

**1-(4-(tert-butyl)phenyl)-4-phenylbutane-1,4-dione(3t)** 223 mg,

76% yield, white solid. M.p.: 60-62 °C. <sup>1</sup>H NMR (400 MHz, Chloroform-*d*) δ 8.04 (d, *J* = 7.0 Hz, 2H), 7.98 (d, *J* = 8.6 Hz, 2H), 7.57 (t, *J* = 7.4 Hz, 1H), 7.51 – 7.45 (m, 4H), 3.45 (s, 4H), 1.35 (s,

9H). <sup>13</sup>C NMR (100 MHz, Chloroform-*d*) δ 199.0, 198.5, 157.0, 137.0, 134.4, 133.3, 128.7, 128.3, 128.3, 125.7, 35.3, 32.8, 32.7, 31.3.

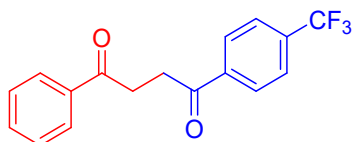

**1-phenyl-4-(4-(trifluoromethyl)phenyl)butane-1,4-dione(3u)**

254 mg, 83% yield, white solid. M.p.: 72-74 °C. <sup>1</sup>H NMR (400 MHz, Chloroform-*d*) δ 8.15 (d, *J* = 8.1 Hz, 2H), 8.04 (d, *J* = 7.1 Hz, 2H), 7.76 (d, *J* = 8.2 Hz, 2H), 7.59 (t, *J* = 7.4 Hz, 1H), 7.49

(dd, *J* = 8.4, 7.0 Hz, 2H), 3.55 – 3.42 (m, 4H). <sup>13</sup>C NMR (100 MHz, Chloroform-*d*) δ 200.1, 197.8, 138.8, 136.7, 133.5, 128.8, 128.6, 128.3, 126.8, 125.9, 125.9, 77.5, 77.2, 76.8, 33.0, 32.7.

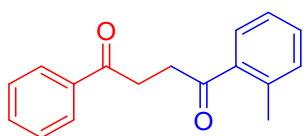

**1-(2-methyl)-4-phenylbutane-1,4-dione (3ac)** 220 mg, 76% yield,

white solid. M.p.: 60-62 °C. <sup>1</sup>H NMR (400 MHz, Chloroform-*d*) δ 8.03 (d, *J* = 7.2 Hz, 2H), 7.81 (d, *J* = 7.8 Hz, 1H), 7.58 (d, *J* = 7.7 Hz,

1H), 7.48 (t, *J* = 7.7 Hz, 2H), 7.41 – 7.35 (m, 1H), 7.31 – 7.25 (m, 2H), 3.48 – 3.33 (m, 4H), 2.50 (s, 3H). <sup>13</sup>C NMR (100 MHz, Chloroform-*d*) δ 202.8, 198.8, 138.2, 138.1, 137.0, 133.3, 132.0, 131.4, 128.7, 128.7, 128.3, 125.9, 35.5, 33.0, 21.4. HRMS (ESI) calcd for [M + H<sup>+</sup>]: C<sub>17</sub>H<sub>17</sub>O<sub>2</sub> 253.1223, found 253.1229.

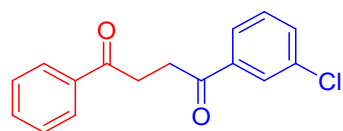

**1-(3-bromophenyl)-4-phenylbutane-1,4-dione (3ad)** 192 mg, 71% yield, white solid. M.p.: 75-77 °C. <sup>1</sup>H NMR (400 MHz, Chloroform-*d*) δ 8.10 – 7.99 (m, 3H), 7.92 (d, *J* = 7.8 Hz, 1H), 7.61 – 7.53 (m, 2H), 7.46 (dt, *J* = 22.8, 7.9 Hz, 3H), 3.52 – 3.38 (m, 4H). <sup>13</sup>C NMR (100MHz, Chloroform-*d*) δ 198.6, 197.6, 138.5, 136.8, 135.1, 133.4, 133.2, 130.1, 128.8, 128.4, 128.3, 126.4, 32.8, 32.7.

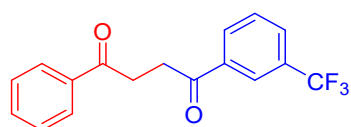

**1-(3-trifluoromethyl)-4-phenylbutane-1,4-dione (3ag)** 235 mg, 85% yield, white solid. M.p.: 71-73 °C. <sup>1</sup>H NMR (400 MHz, Chloroform-*d*) δ 8.29 (s, 1H), 8.23 (d, *J* = 7.9 Hz, 1H), 8.04 (dd, *J* = 8.2, 1.4 Hz, 2H), 7.84 (d, *J* = 7.7 Hz, 1H), 7.72 – 7.55 (m, 2H), 7.49 (t, *J* = 7.6 Hz, 2H), 3.49 (h, *J* = 5.4 Hz, 4H). <sup>13</sup>C NMR (100 MHz, Chloroform-*d*) δ 199.1, 198.9, 138.5, 137.0, 134.1, 133.3, 128.8, 128.8, 128.6, 128.3, 125.5, 32.7 (d, *J* = 11.6 Hz). HRMS (ESI) calcd for [M + H<sup>+</sup>]: C<sub>17</sub>H<sub>14</sub>F<sub>3</sub>O<sub>2</sub> 307.0940, found 307.0942.

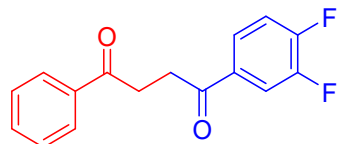

**1-(3,4-difluorine)-4-phenylbutane-1,4-dione(3ah)** 220 mg, 82% yield, white solid. M.p.: 89-91 °C. <sup>1</sup>H NMR (400 MHz, Chloroform-*d*) δ 8.12 – 7.99 (m, 2H), 7.91 – 7.79 (m, 2H), 7.64 – 7.55 (m, 1H), 7.49 (t, *J* = 7.6 Hz, 2H), 7.35 – 7.28 (m, 1H), 3.47 (t, *J* = 5.8 Hz, 2H), 3.40 (dd, *J* = 6.5, 5.0 Hz, 2H). <sup>13</sup>C NMR (100 MHz, Chloroform-*d*) δ 198.5, 196.4, 136.8, 133.5, 128.5 (d, *J* = 53.6 Hz), 125.4, 117.7 (d, *J* = 18 Hz), 32.7, 32.6. HRMS (ESI) calcd for [M + H<sup>+</sup>]: C<sub>16</sub>H<sub>13</sub>F<sub>2</sub>O<sub>2</sub> 275.0878, found 275.0879.

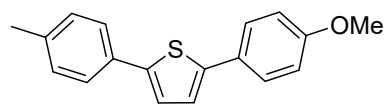

**2-(4-methoxyphenyl)-5-(p-tolyl)thiophene(11)** 103 mg, 85% yield, white solid. M.p.: 158-160 °C. <sup>1</sup>H NMR (400 MHz, Chloroform-*d*) δ 7.55 (dd, *J* = 14.1, 8.3 Hz, 4H), 7.25 – 7.14 (m, 4H), 6.94 (d, *J* = 8.7 Hz, 2H), 3.85 (s, 3H), 2.39 (s, 3H). <sup>13</sup>C NMR (150 MHz, Chloroform-*d*) δ 159.3, 143.2, 142.9, 137.3, 131.8, 129.7, 127.5, 127.0, 125.6, 123.6, 123.0, 114.5, 55.5, 21.3.

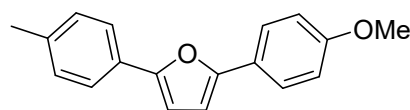

**2-(4-methoxyphenyl)-5-(p-tolyl)furan(12)** 159 mg, 88% yield, white solid. M.p.: 166-168 °C. <sup>1</sup>H NMR (400 MHz, Chloroform-*d*) δ 7.72 – 7.67 (m, 2H), 7.64 (d, *J* = 8.0 Hz, 2H), 7.25 – 7.19 (m, 2H), 6.96 (d, *J* = 8.9 Hz, 2H), 6.67 (d, *J* = 3.4 Hz, 1H), 6.60 (d, *J* = 3.4 Hz, 1H), 3.85 (s, 3H), 2.39 (s, 3H). <sup>13</sup>C NMR (100 MHz, Chloroform-*d*) δ 159.2, 153.2, 153.1, 137.1, 129.5, 128.4, 125.3, 124.2, 123.7, 114.3, 106.6, 105.7, 55.5, 21.4.

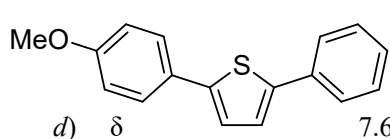

**2-(4-methoxyphenyl)-5-phenylthiophene(13)** 172 mg, 86% yield, yellow solid. M.p.: 146-148 °C. <sup>1</sup>H NMR (400 MHz, Chloroform-*d*) δ 7.61 (d, *J* = 8.0 Hz, 2H), 7.55 (d, *J* = 8.8 Hz, 2H), 7.37 (t, *J* = 7.7 Hz, 2H), 7.27 – 7.23 (m, 2H), 7.17 (d, *J* = 3.8 Hz, 1H), 6.92 (d, *J* = 8.8 Hz, 2H), 3.83 (s, 3H). <sup>13</sup>C NMR

(100 MHz, Chloroform-*d*)  $\delta$  159.5, 143.8, 142.8, 134.6, 129.0, 127.5, 127.1, 125.7, 124.1, 123.1, 114.5, 55.5.

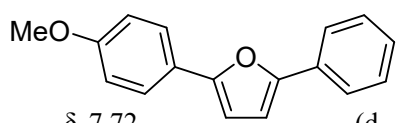 **2-(4-methoxyphenyl)-5-phenylfuran(14)** 191 mg, 87% yield, white solid. M.p.: 148-150 °C. <sup>1</sup>H NMR (400 MHz, Chloroform-*d*)  $\delta$  7.72 (d, *J* = 7.0 Hz, 2H), 7.67 (d, *J* = 8.9 Hz, 2H), 7.39 (dd, *J* = 8.4, 7.1 Hz, 2H), 7.24 (d, *J* = 8.0 Hz, 1H), 6.94 (d, *J* = 8.9 Hz, 2H), 6.71 (d, *J* = 3.4 Hz, 1H), 6.59 (d, *J* = 3.4 Hz, 1H), 3.84 (s, 3H). <sup>13</sup>C NMR (100 MHz, Chloroform-*d*)  $\delta$  159.3, 153.7, 152.9, 131.1, 128.8, 127.2, 125.4, 124.1, 123.7, 114.4, 107.3, 105.8, 55.5.

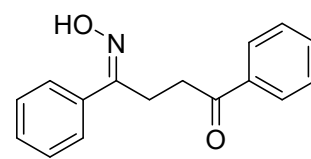 **(Z)-4-(hydroxyimino)-1,4-diphenylbutan-1-one(15)** 166 mg, 72% yield, white solid. M.p.: 90-92 °C. <sup>1</sup>H NMR (600 MHz, Chloroform-*d*)  $\delta$  7.96 (d, *J* = 8.3 Hz, 2H), 7.69 – 7.63 (m, 2H), 7.55 (td, *J* = 7.5, 1.3 Hz, 1H), 7.47 – 7.42 (m, 2H), 7.42 – 7.37 (m, 3H), 3.33 – 3.20 (m, 4H). <sup>13</sup>C NMR (100 MHz, Chloroform-*d*)  $\delta$  199.0, 159.1, 136.7, 135.4, 133.3, 129.6, 128.8, 128.7, 128.3, 126.4, 35.1, 21.5. HRMS (ESI) calcd for [M + H<sup>+</sup>]: C<sub>16</sub>H<sub>15</sub>NO<sub>2</sub> 254.1183, found 254.1189.

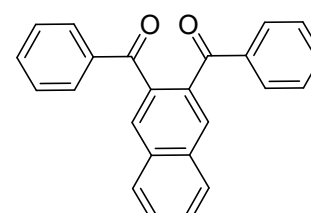 **naphthalene-2,3-diylbis(phenylmethanone)(16)** 133 mg, 68% yield, white solid. M.p.: 144-146 °C. <sup>1</sup>H NMR (400 MHz, Chloroform-*d*)  $\delta$  8.10 (s, 2H), 7.94 (dd, *J* = 6.2, 3.3 Hz, 2H), 7.87 – 7.79 (m, 4H), 7.66 (dd, *J* = 6.2, 3.2 Hz, 2H), 7.53 (d, *J* = 7.4 Hz, 2H), 7.41 (t, *J* = 7.7 Hz, 4H). <sup>13</sup>C NMR (100 MHz, Chloroform-*d*)  $\delta$  196.4, 137.6, 137.1, 133.1, 133.0, 130.9, 130.0, 128.9, 128.8, 128.5.

## 9. Copies of <sup>1</sup>H NMR and <sup>13</sup>C NMR

<sup>1</sup>H NMR spectra (400 MHz) in CDCl<sub>3</sub> of compound 4



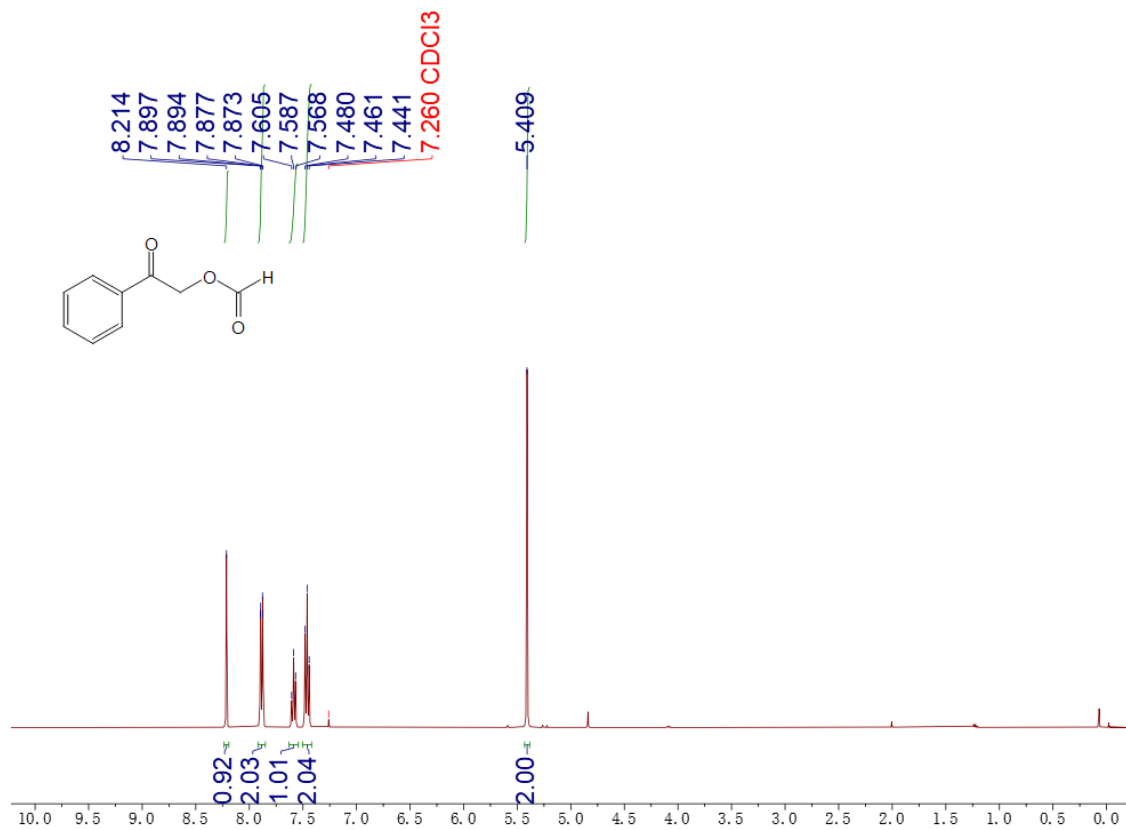

<sup>13</sup>C NMR spectra (400 MHz) in CDCl<sub>3</sub> of compound **4**

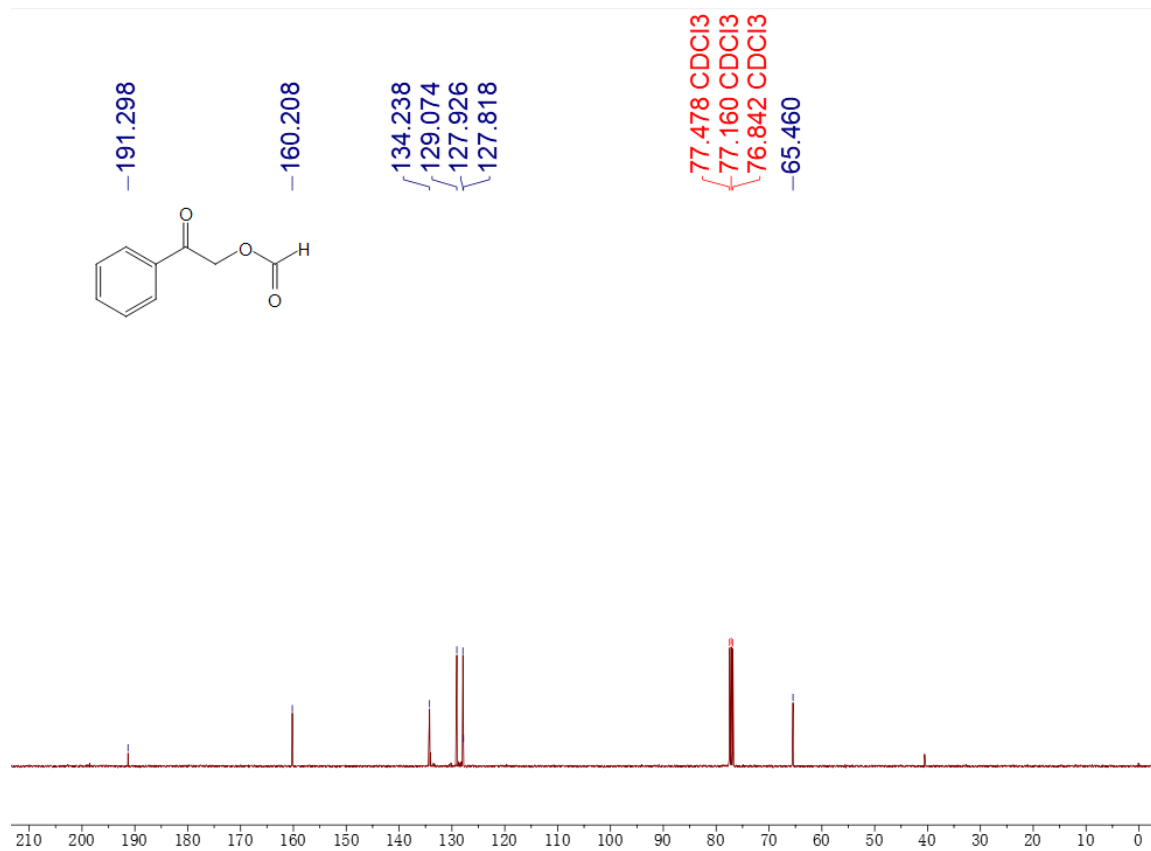

<sup>1</sup>H NMR spectra (400 MHz) in CDCl<sub>3</sub> of compound **3a**

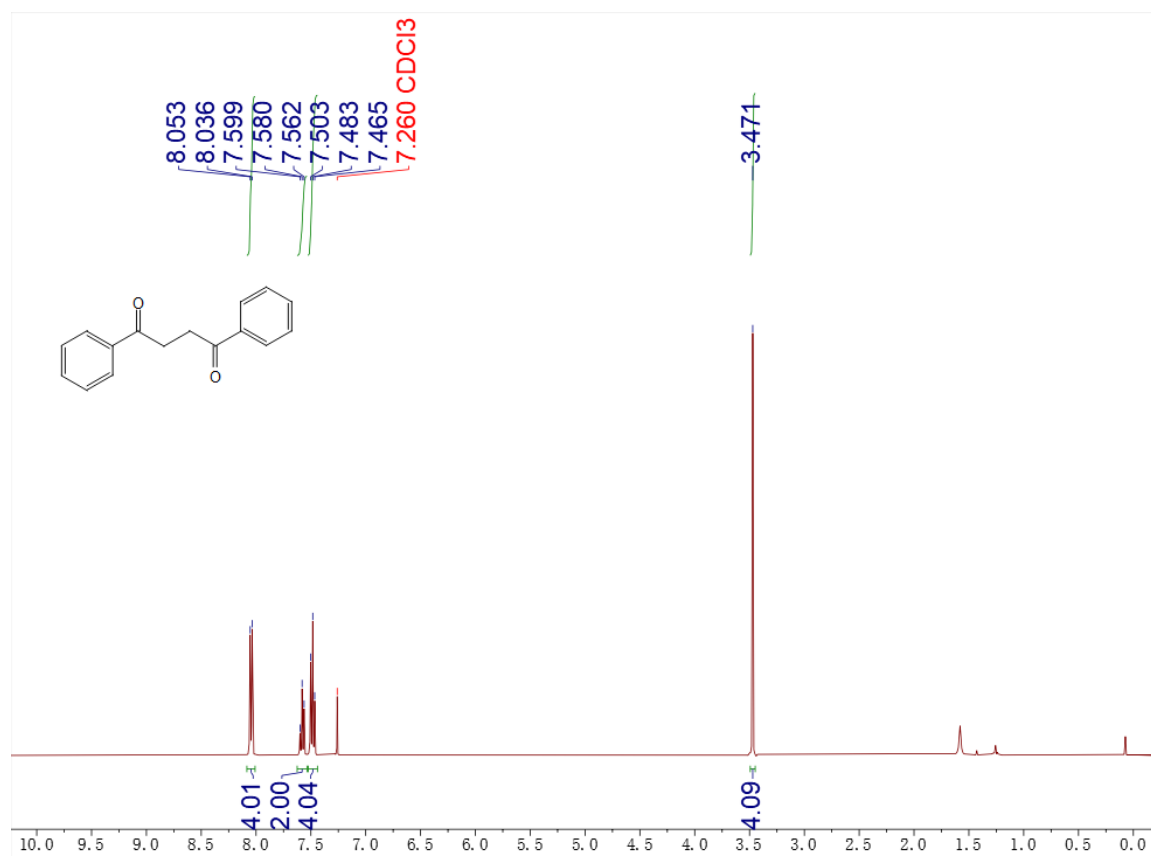

<sup>13</sup>C NMR spectra (400 MHz) in CDCl<sub>3</sub> of compound **3a**

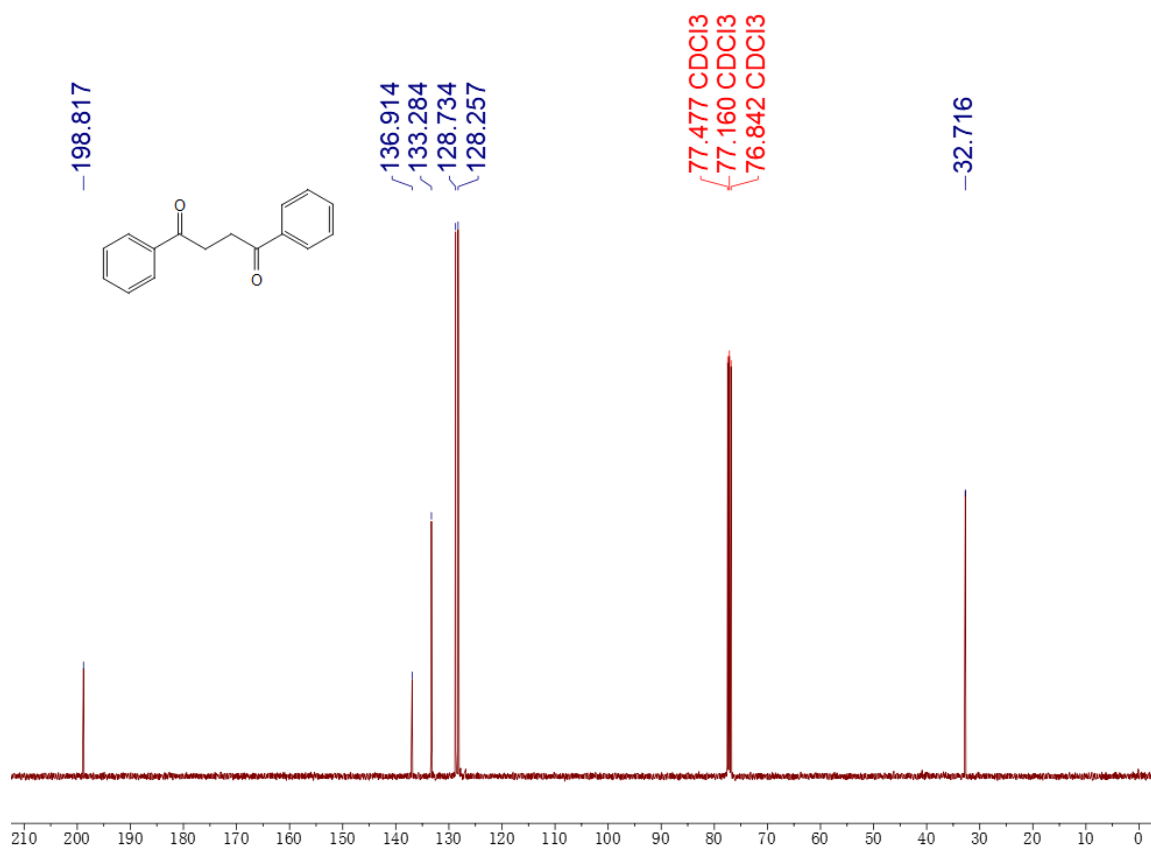

<sup>1</sup>H NMR spectra (400 MHz) in CDCl<sub>3</sub> of compound **3b (3v)**

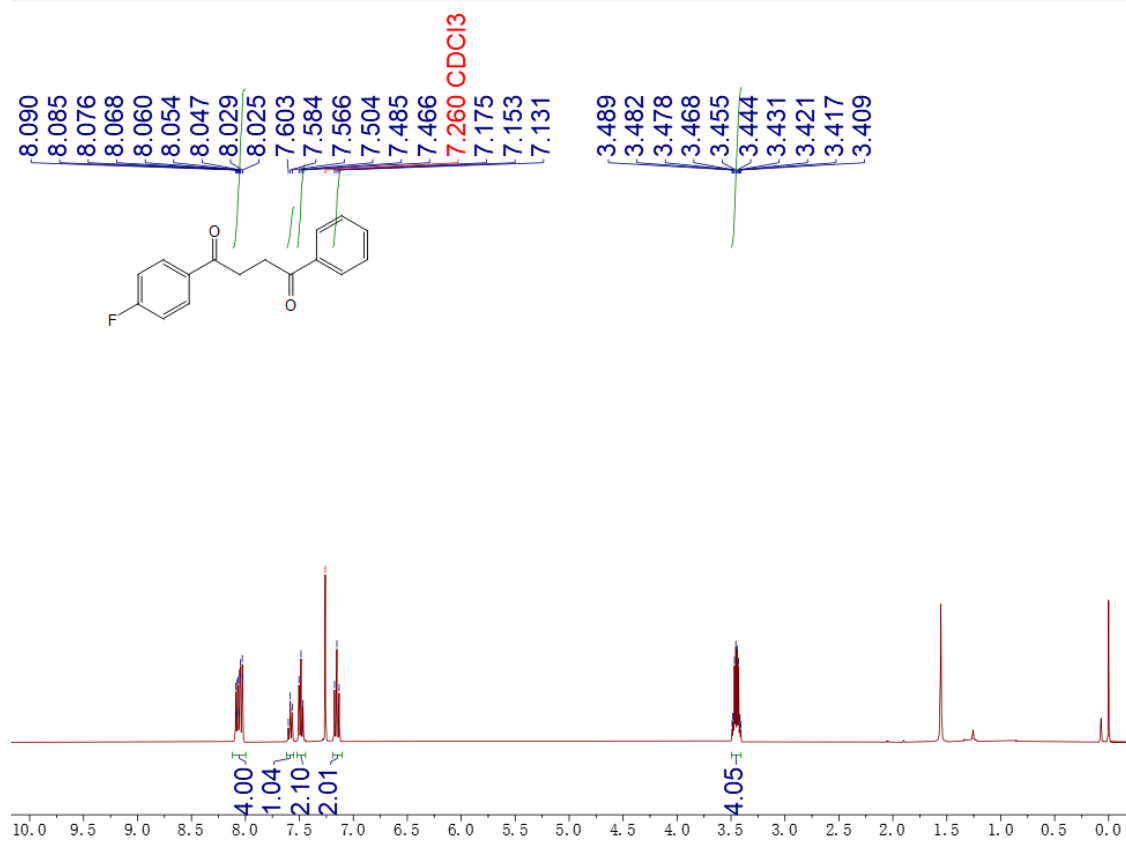

<sup>13</sup>C NMR spectra (600 MHz) in CDCl<sub>3</sub> of compound **3b (3v)**

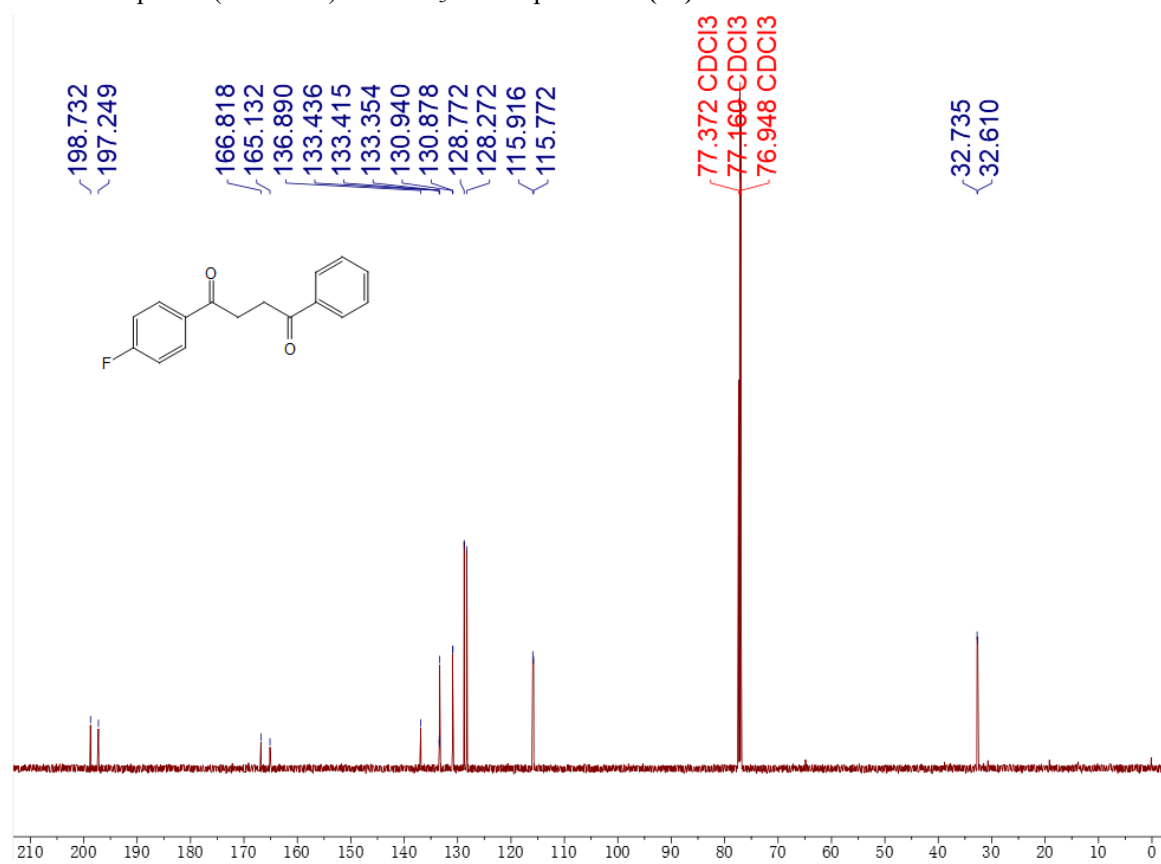

<sup>1</sup>H NMR spectra (400 MHz) in CDCl<sub>3</sub> of compound **3c (3w)**

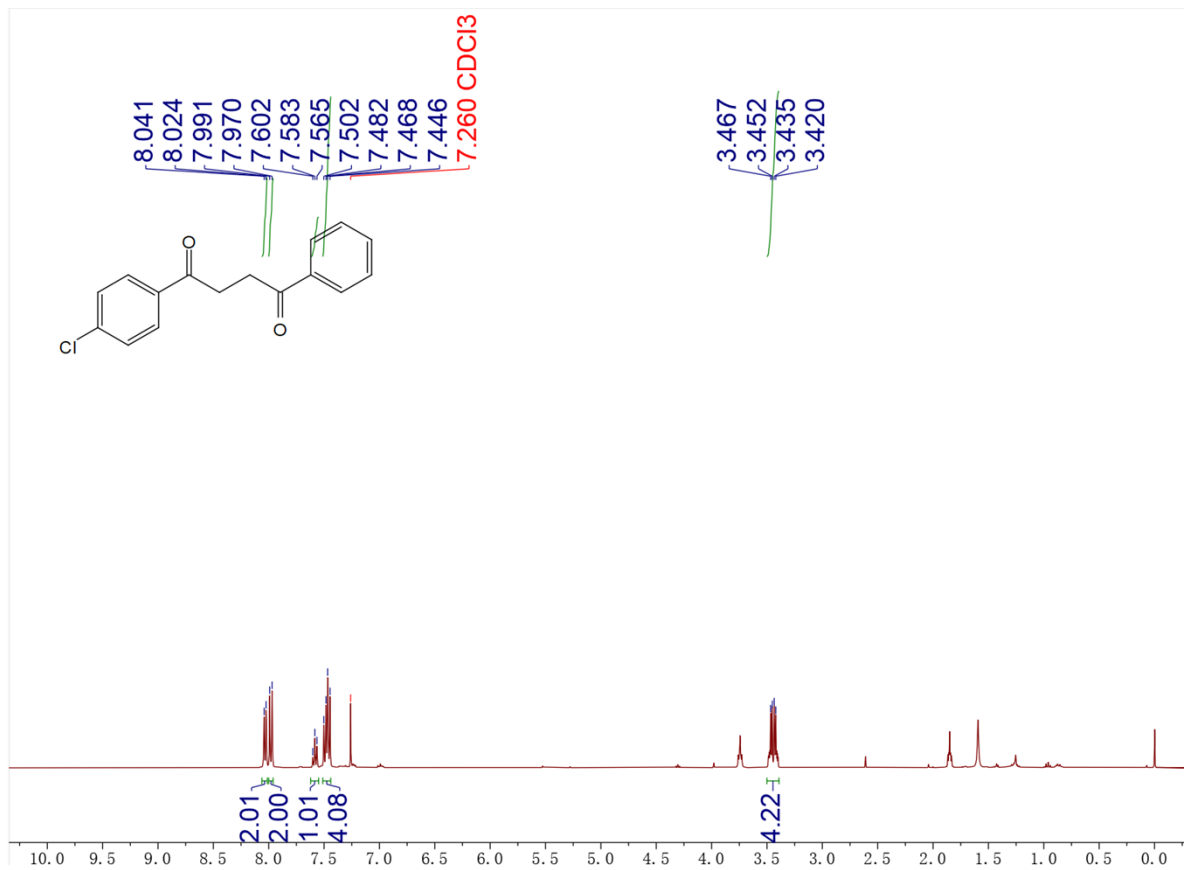

<sup>13</sup>C NMR spectra (400 MHz) in CDCl<sub>3</sub> of compound **3c (3w)**

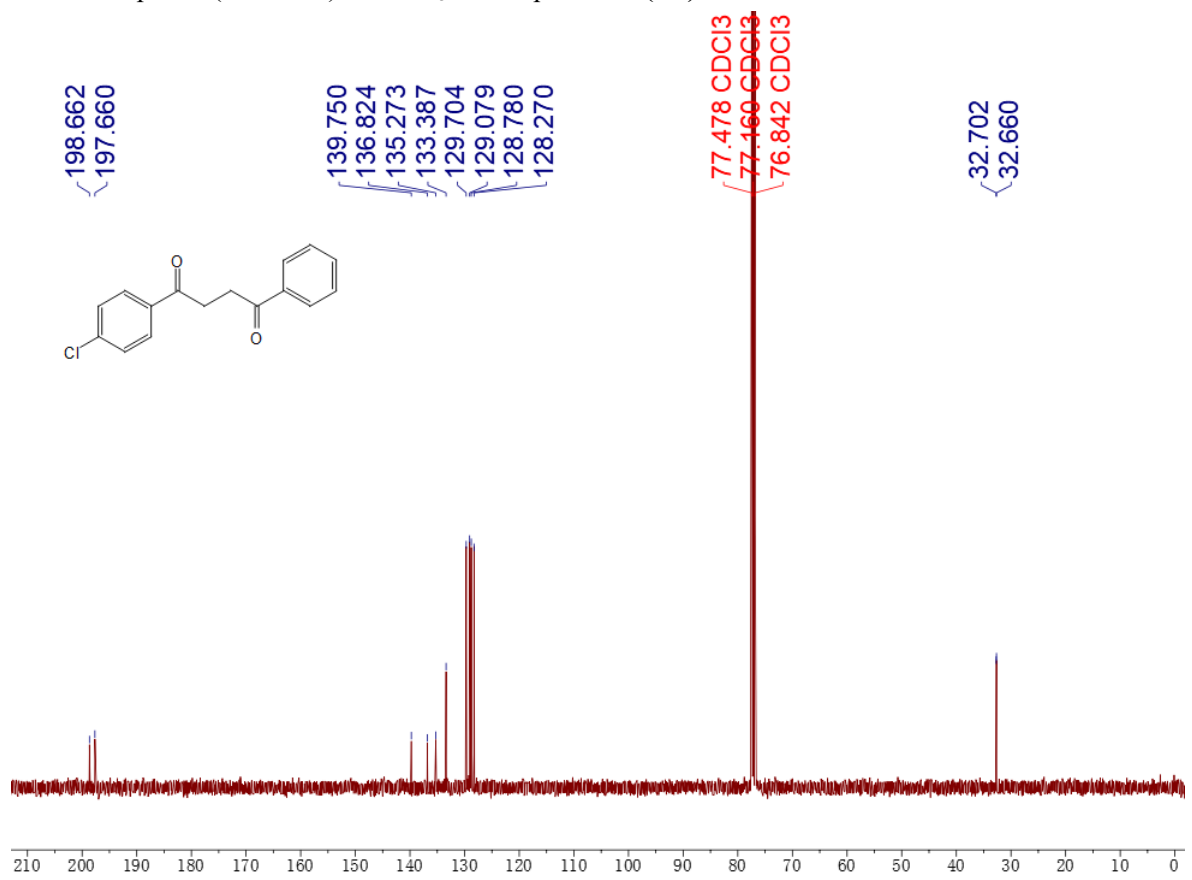

<sup>13</sup>C NMR spectra (400 MHz) in CDCl<sub>3</sub> of compound **3d (3x)**

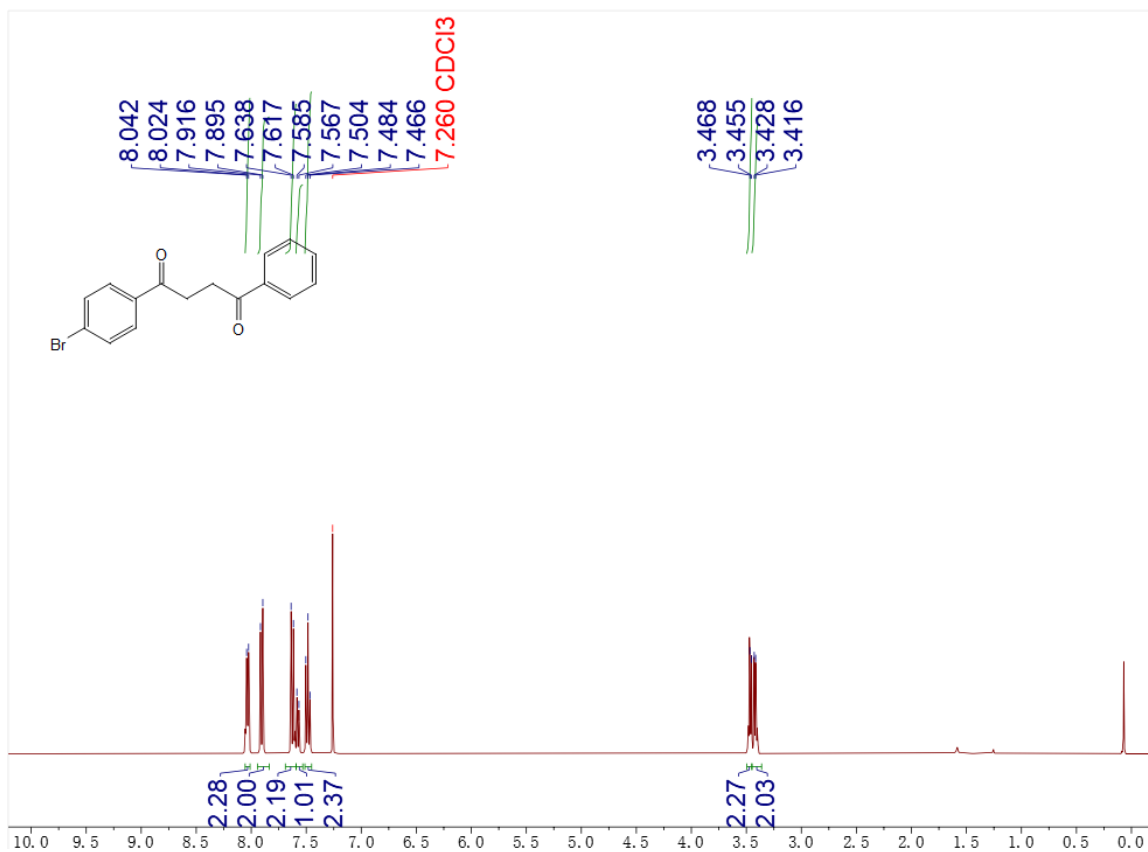

<sup>13</sup>C NMR spectra (400 MHz) in CDCl<sub>3</sub> of compound **3d (3x)**

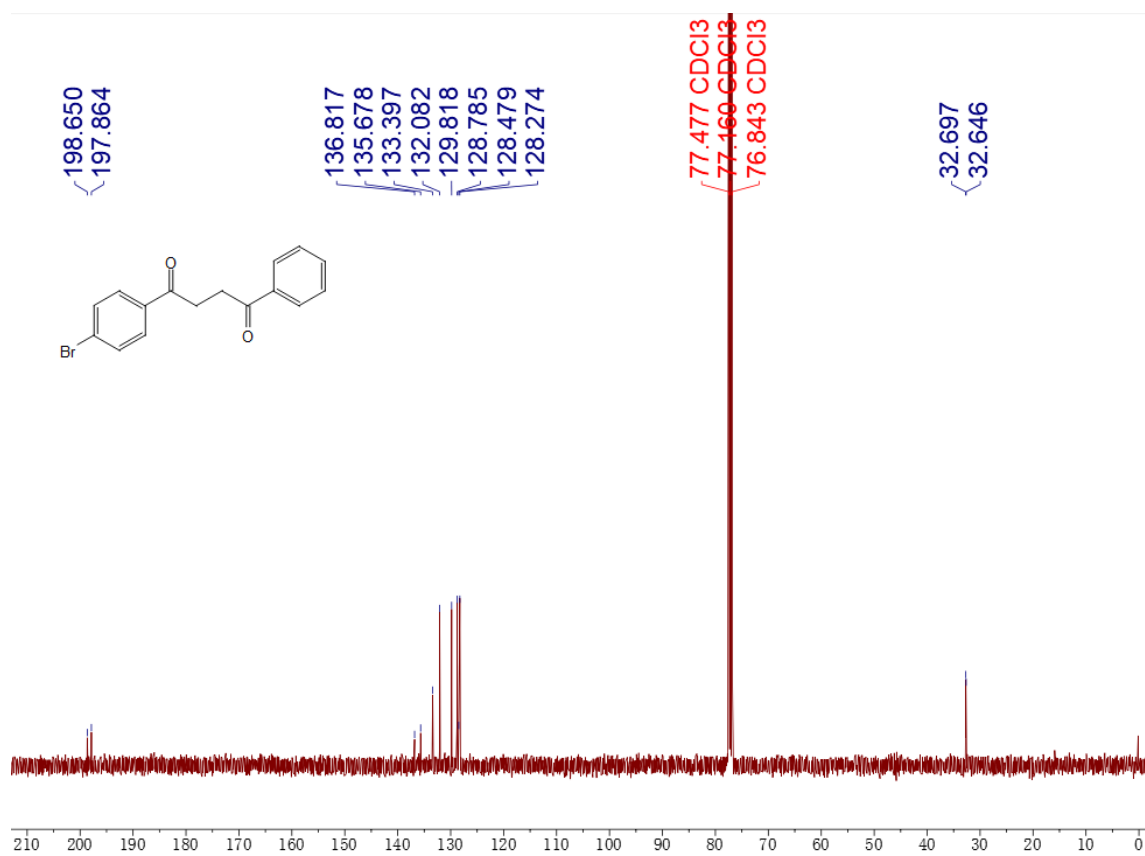

<sup>13</sup>C NMR spectra (400 MHz) in CDCl<sub>3</sub> of compound **3e (3y)**

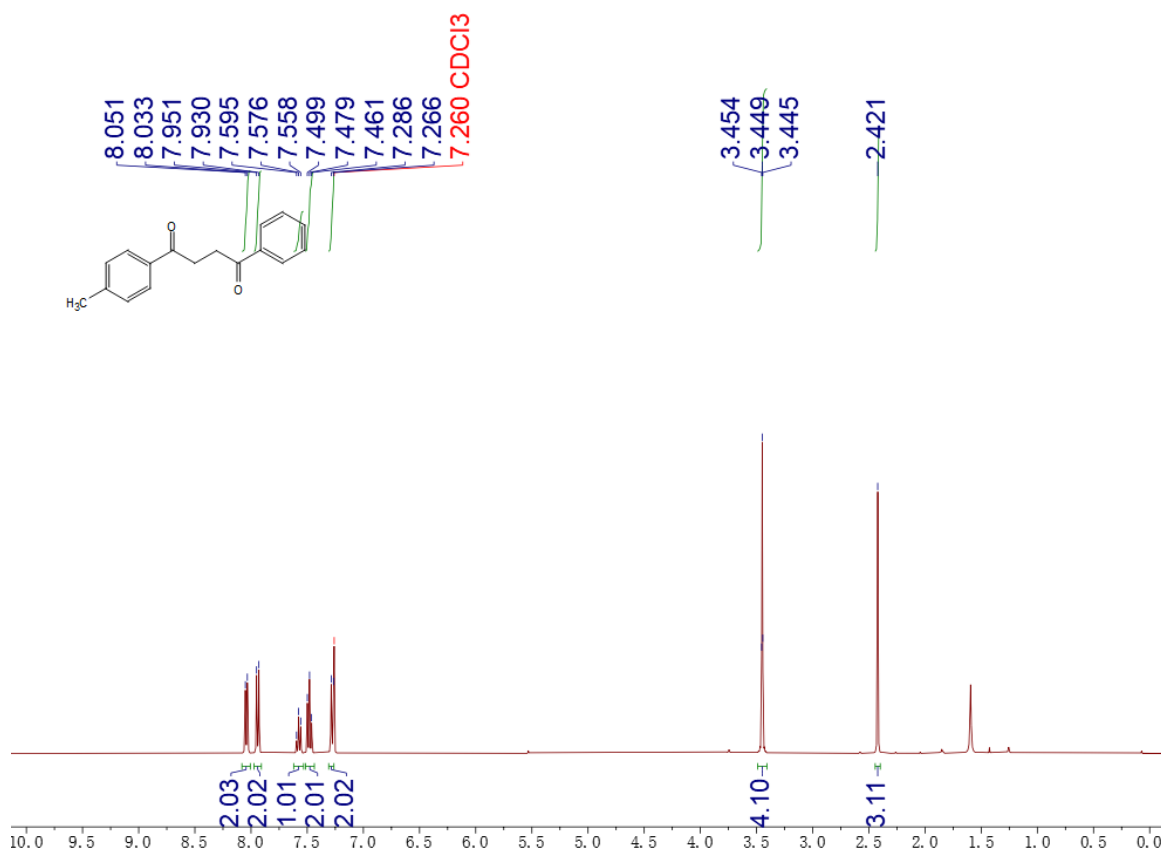

<sup>13</sup>C NMR spectra (400 MHz) in CDCl<sub>3</sub> of compound **3e (3y)**

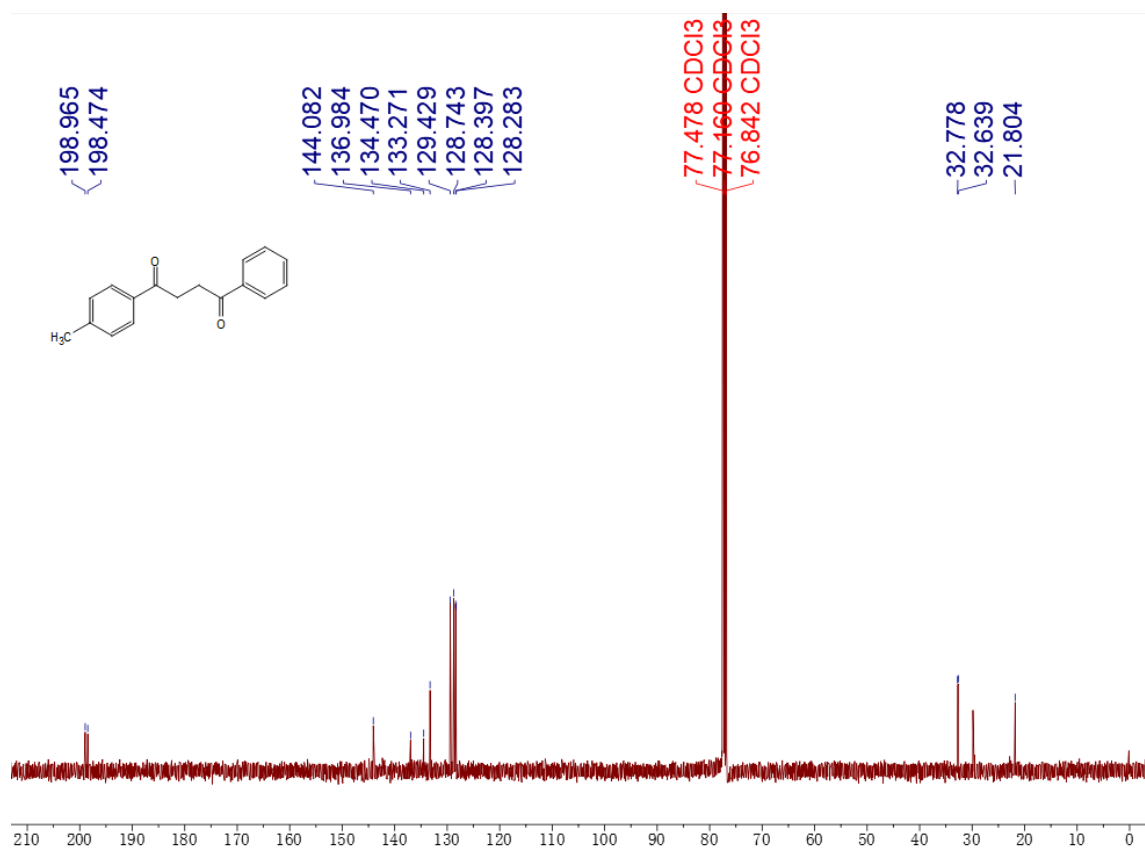

<sup>1</sup>H NMR spectra (400 MHz) in CDCl<sub>3</sub> of compound **3f** (**3s**)

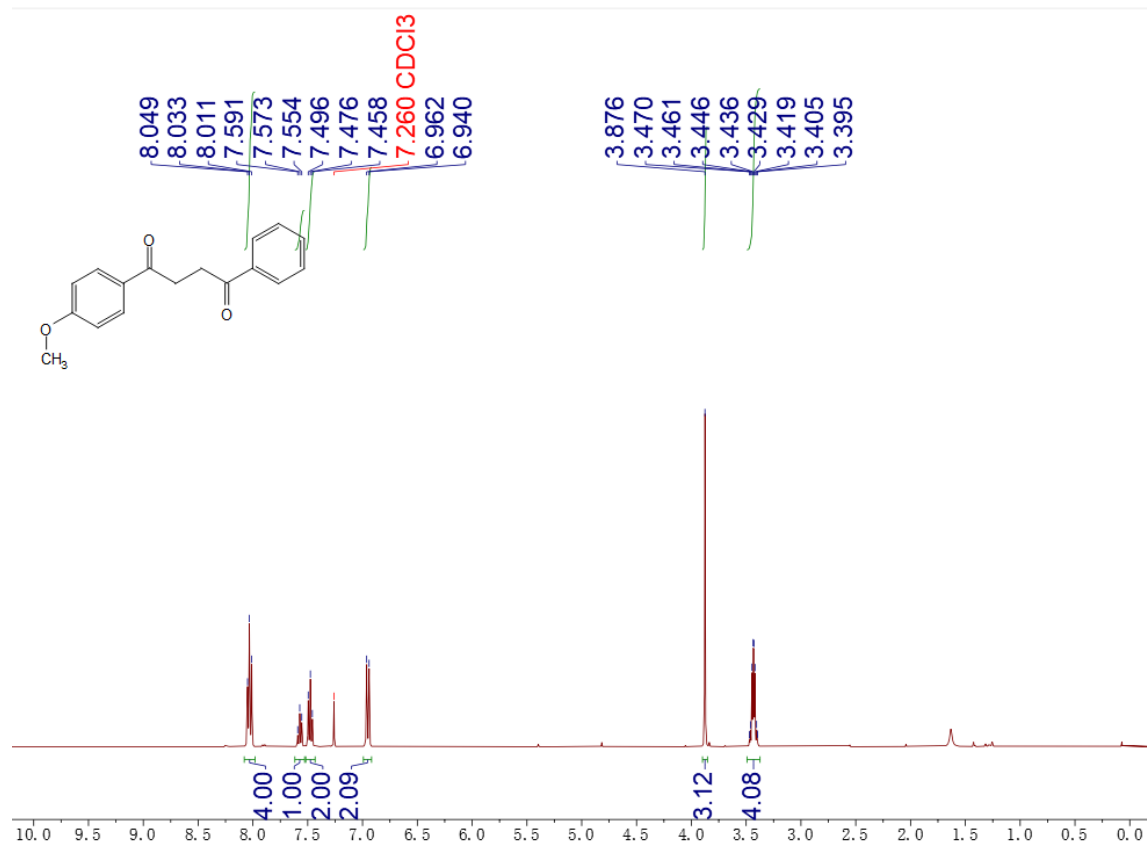

<sup>13</sup>C NMR spectra (400 MHz) in CDCl<sub>3</sub> of compound **3f** (**3s**)

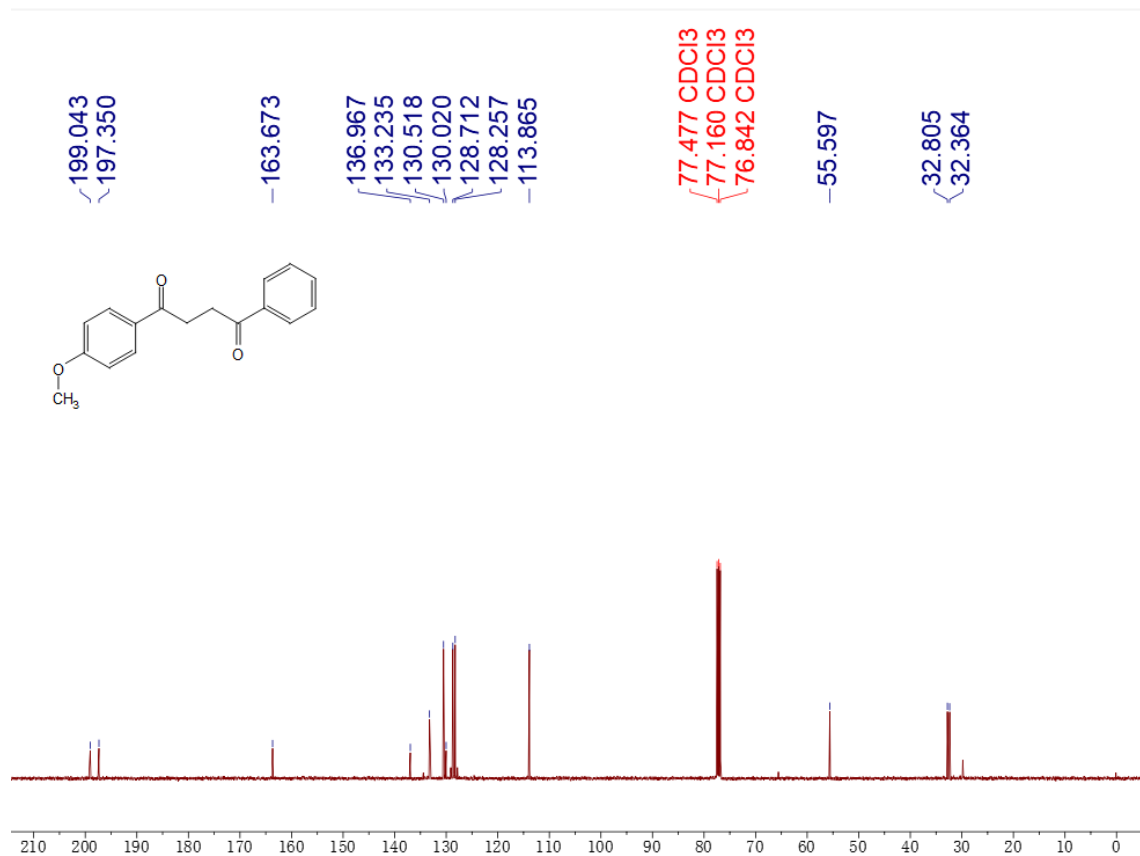

<sup>1</sup>H NMR spectra (400 MHz) in CDCl<sub>3</sub> of compound **3g (3z)**

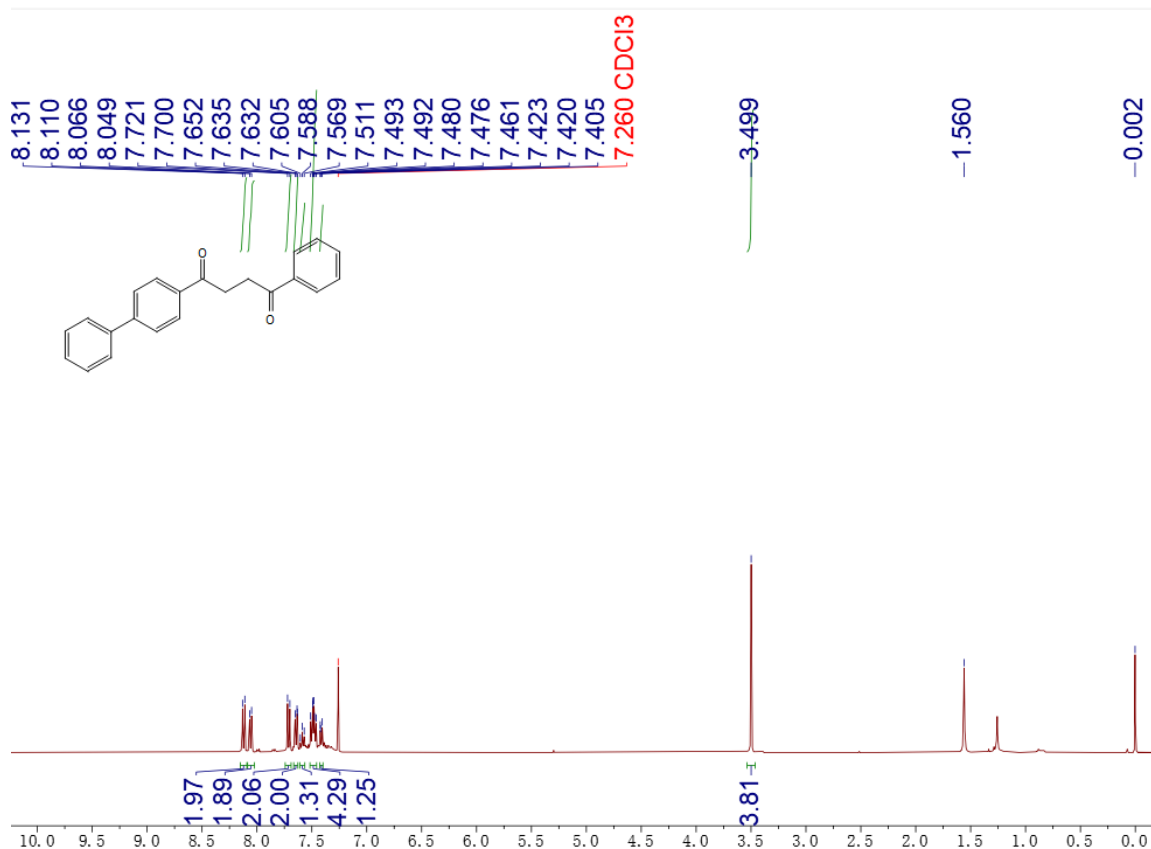

<sup>13</sup>C NMR spectra (400 MHz) in CDCl<sub>3</sub> of compound **3g (3z)**

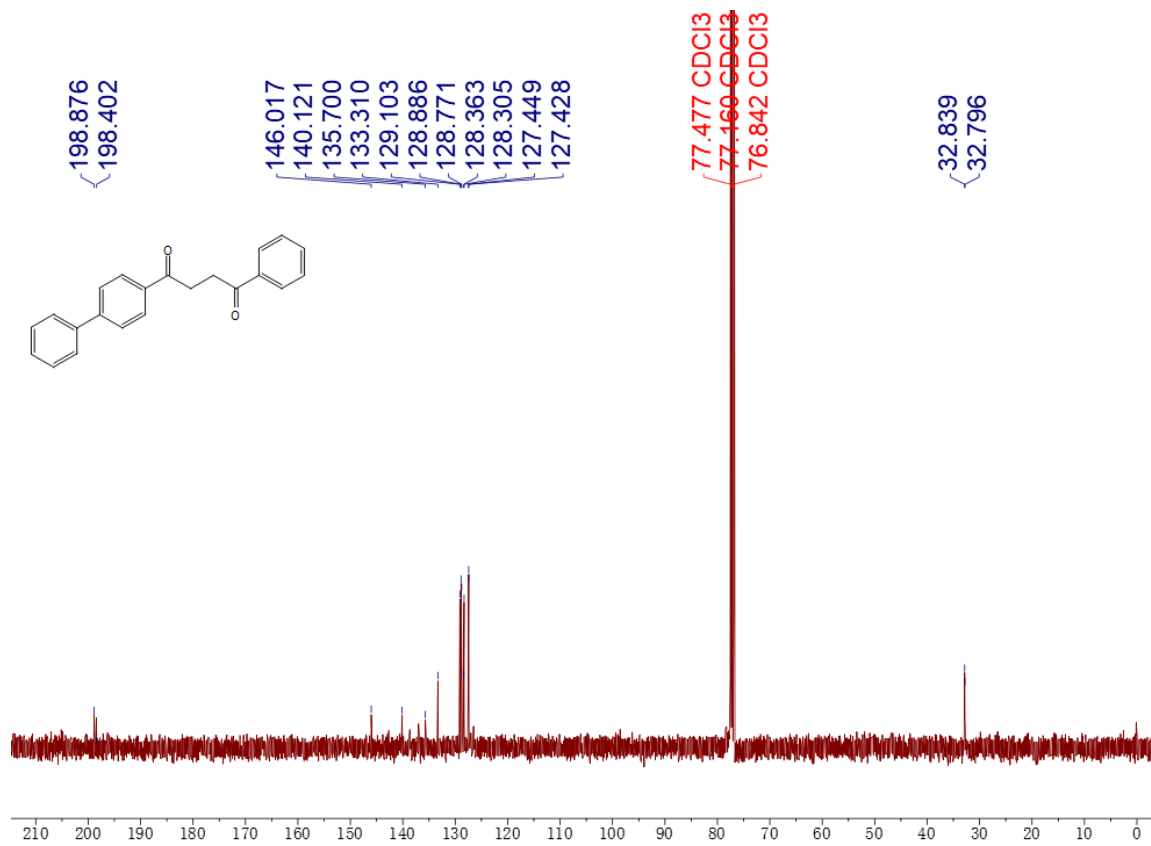



<sup>1</sup>H NMR spectra (400 MHz) in CDCl<sub>3</sub> of compound **3h (3aa)**

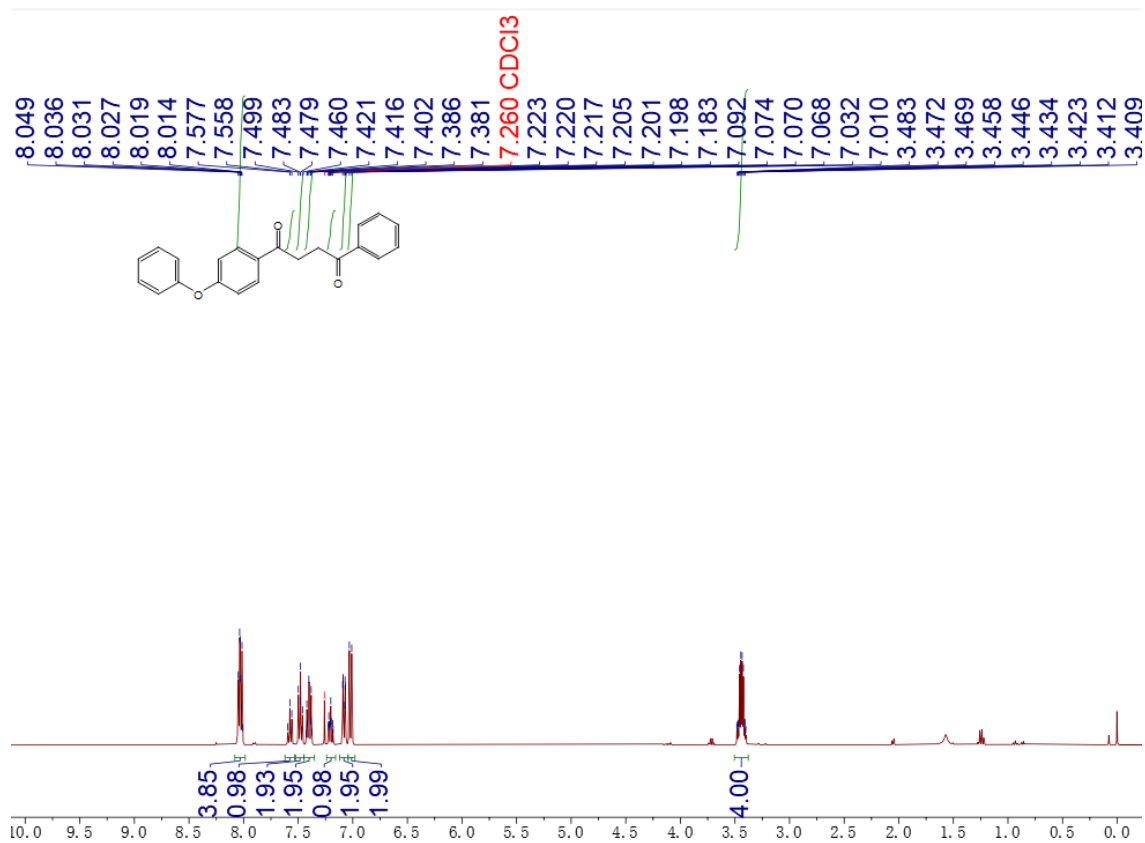

<sup>13</sup>C NMR spectra (400 MHz) in CDCl<sub>3</sub> of compound **3h (3aa)**

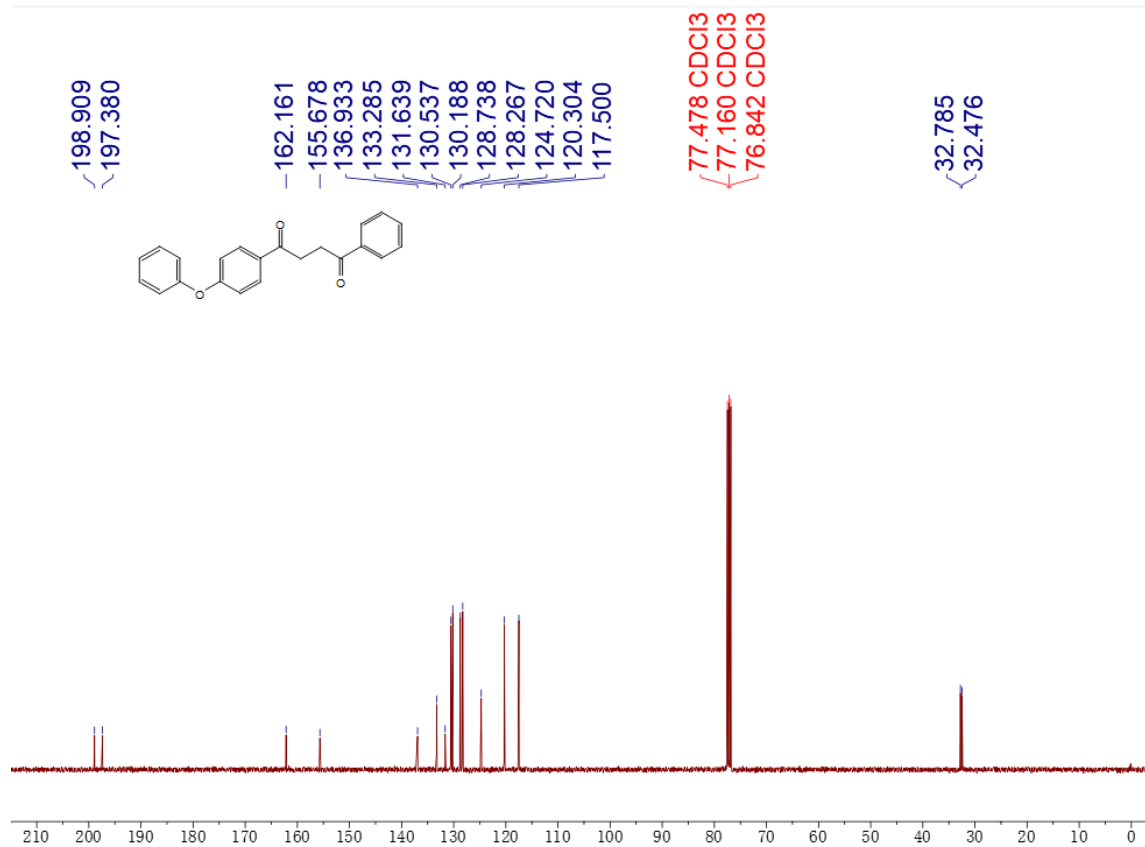

<sup>1</sup>H NMR spectra (400 MHz) in CDCl<sub>3</sub> of compound **3i**

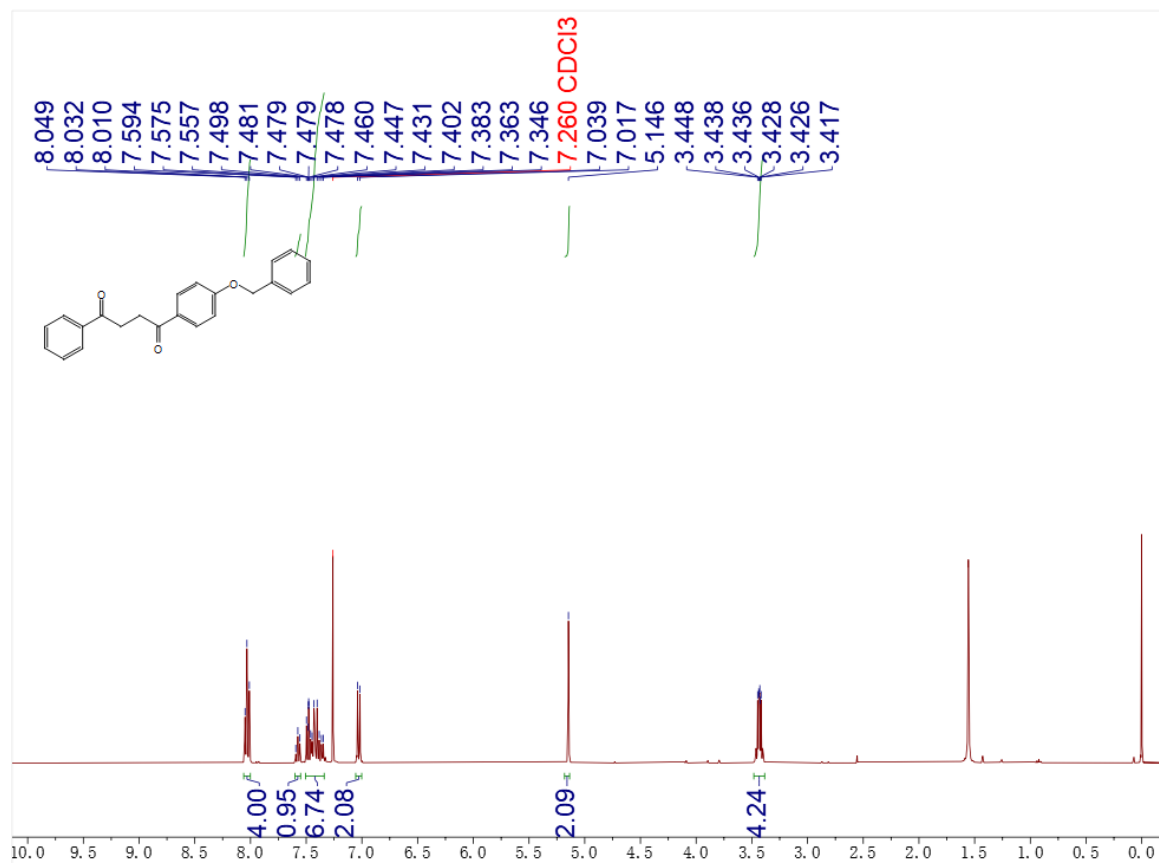

<sup>13</sup>C NMR spectra (400 MHz) in CDCl<sub>3</sub> of compound **3i**

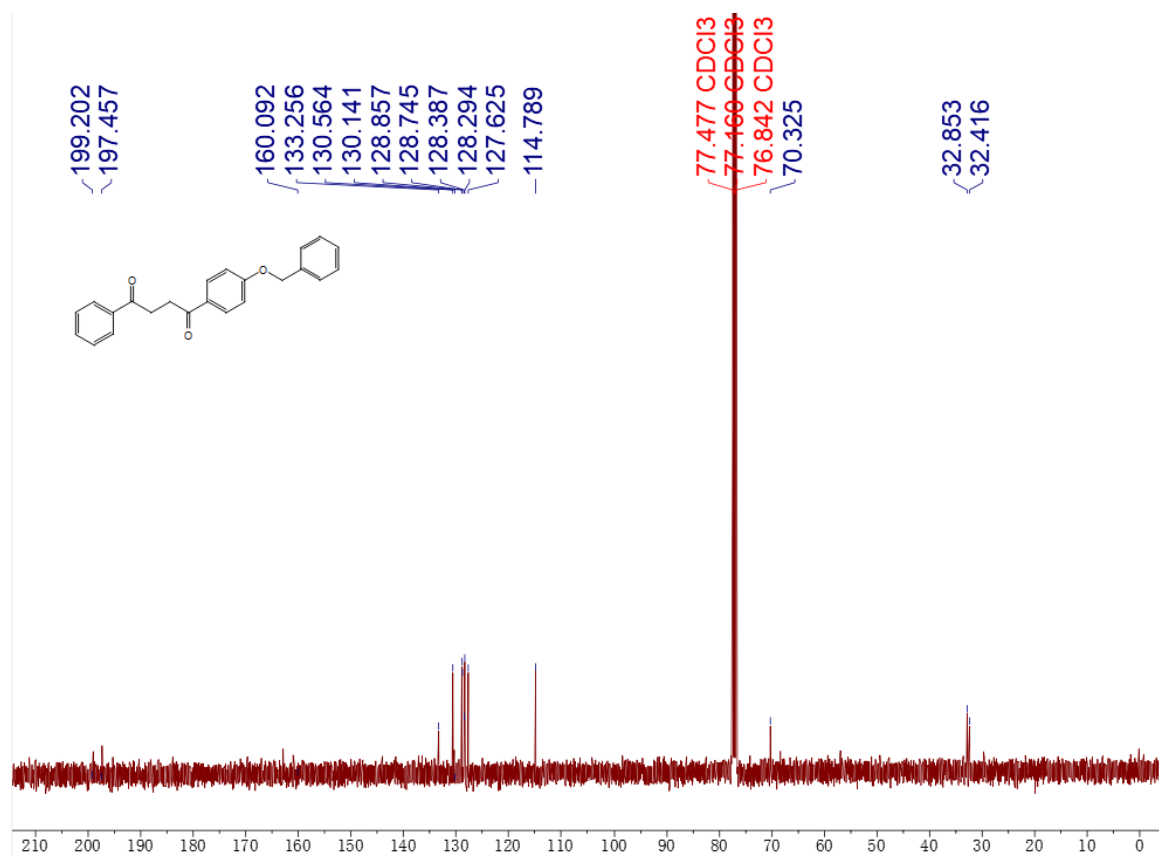

<sup>1</sup>H NMR spectra (400 MHz) in CDCl<sub>3</sub> of compound **3j** (**3ae**)

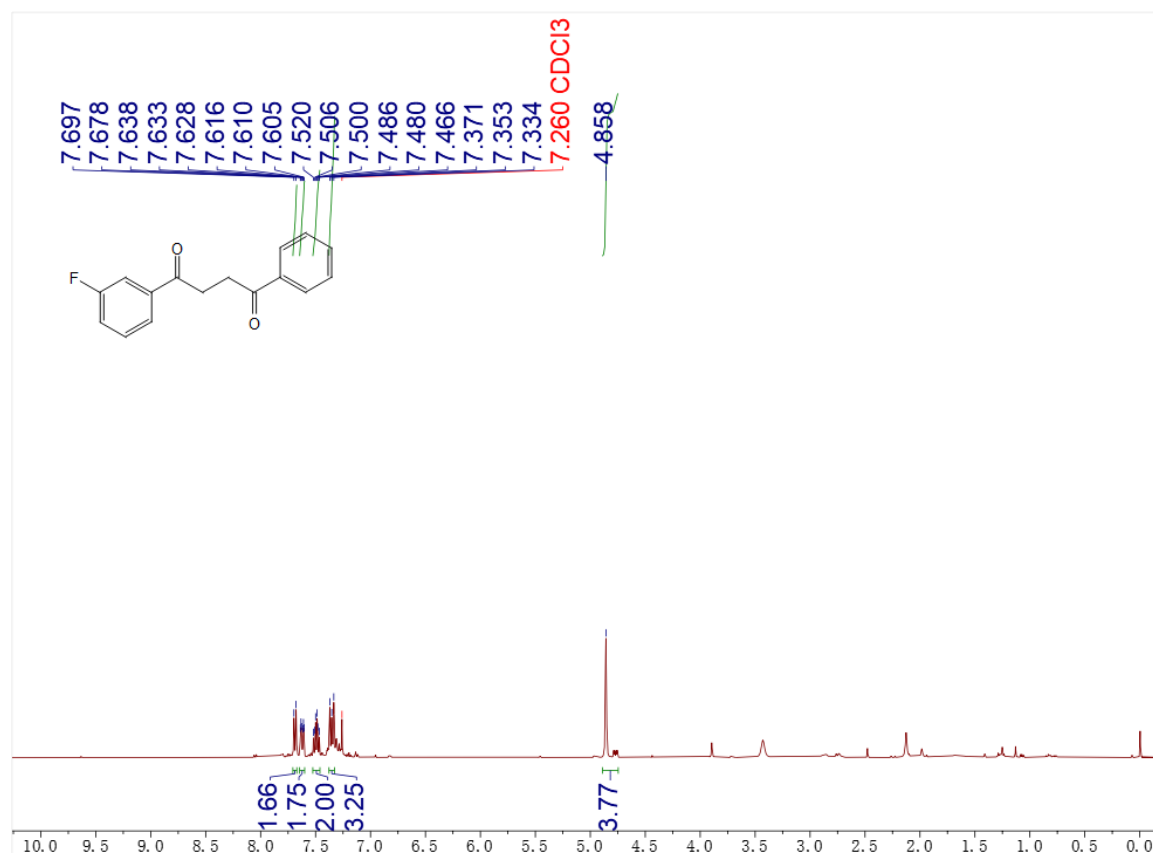

<sup>13</sup>C NMR spectra (400 MHz) in CDCl<sub>3</sub> of compound **3j** (**3ae**)

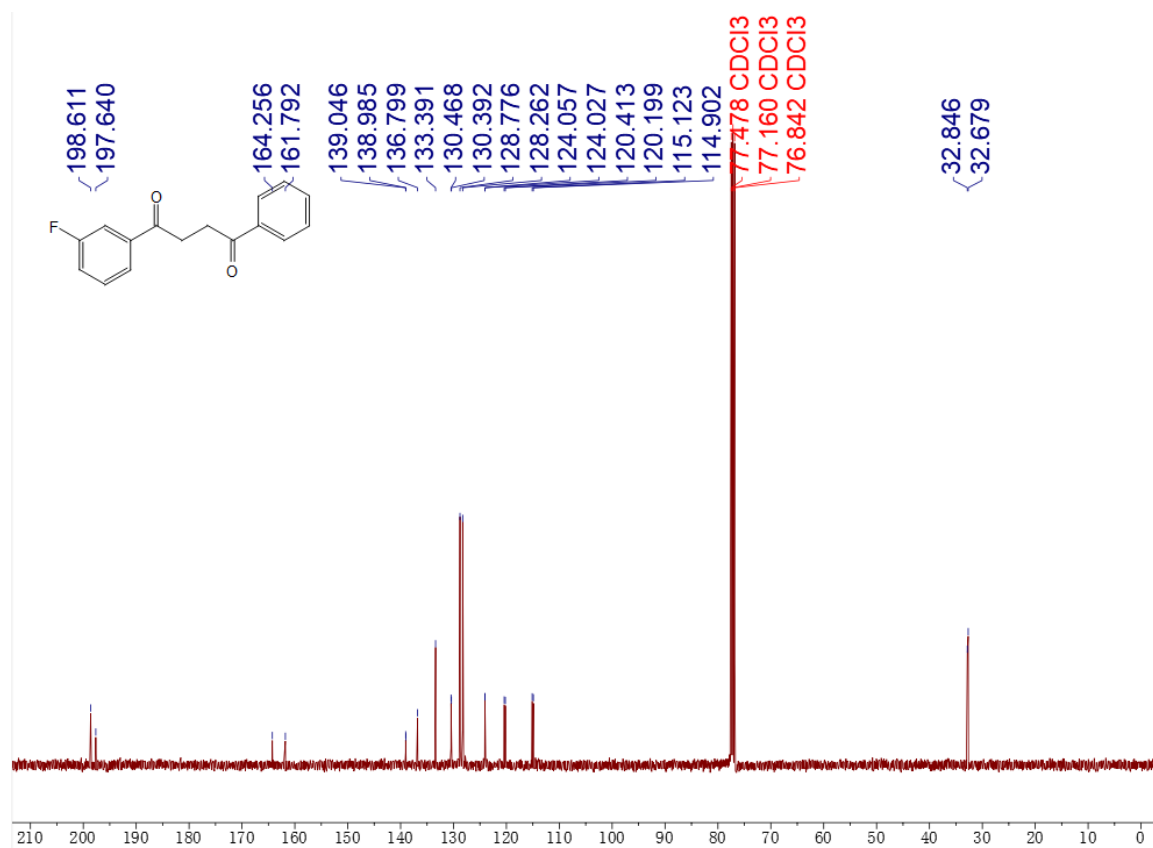

<sup>1</sup>H NMR spectra (400 MHz) in CDCl<sub>3</sub> of compound **3k**

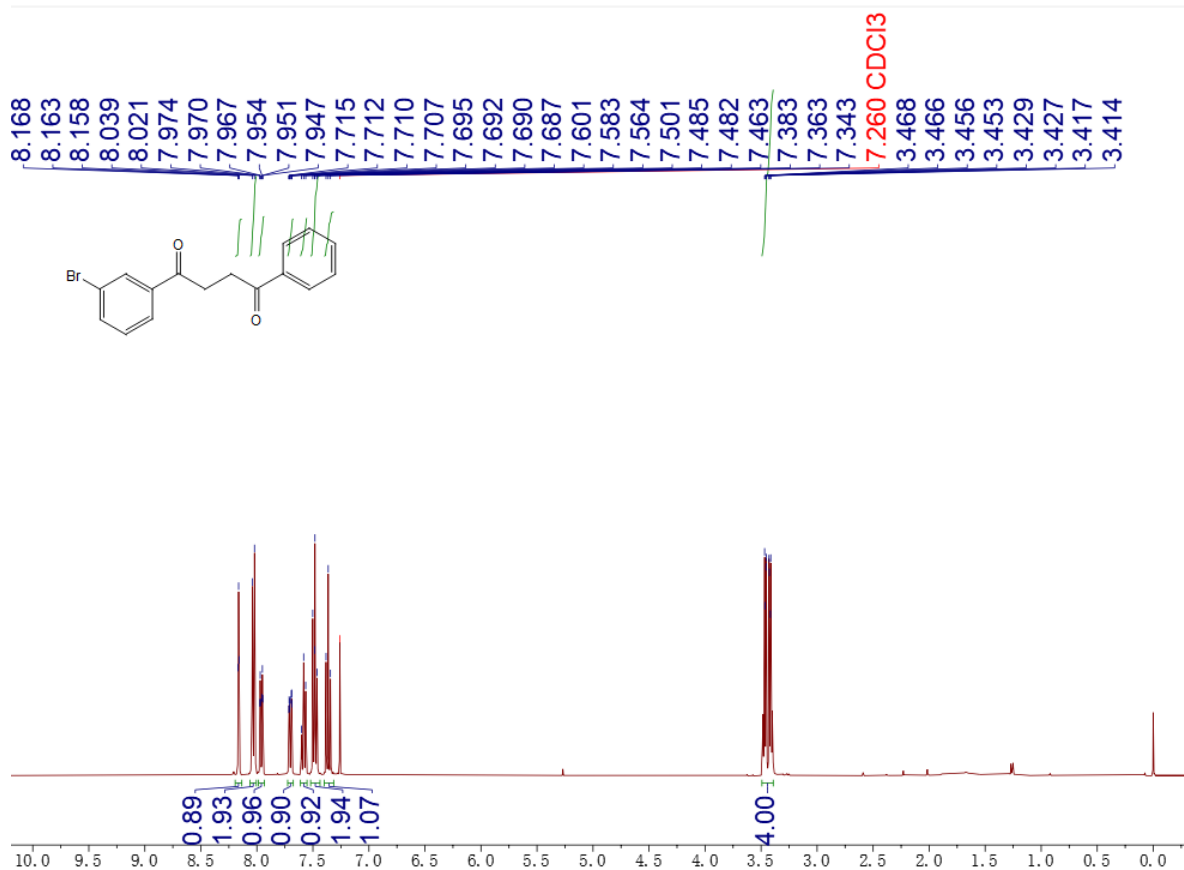

<sup>13</sup>C NMR spectra (400 MHz) in CDCl<sub>3</sub> of compound **3k**

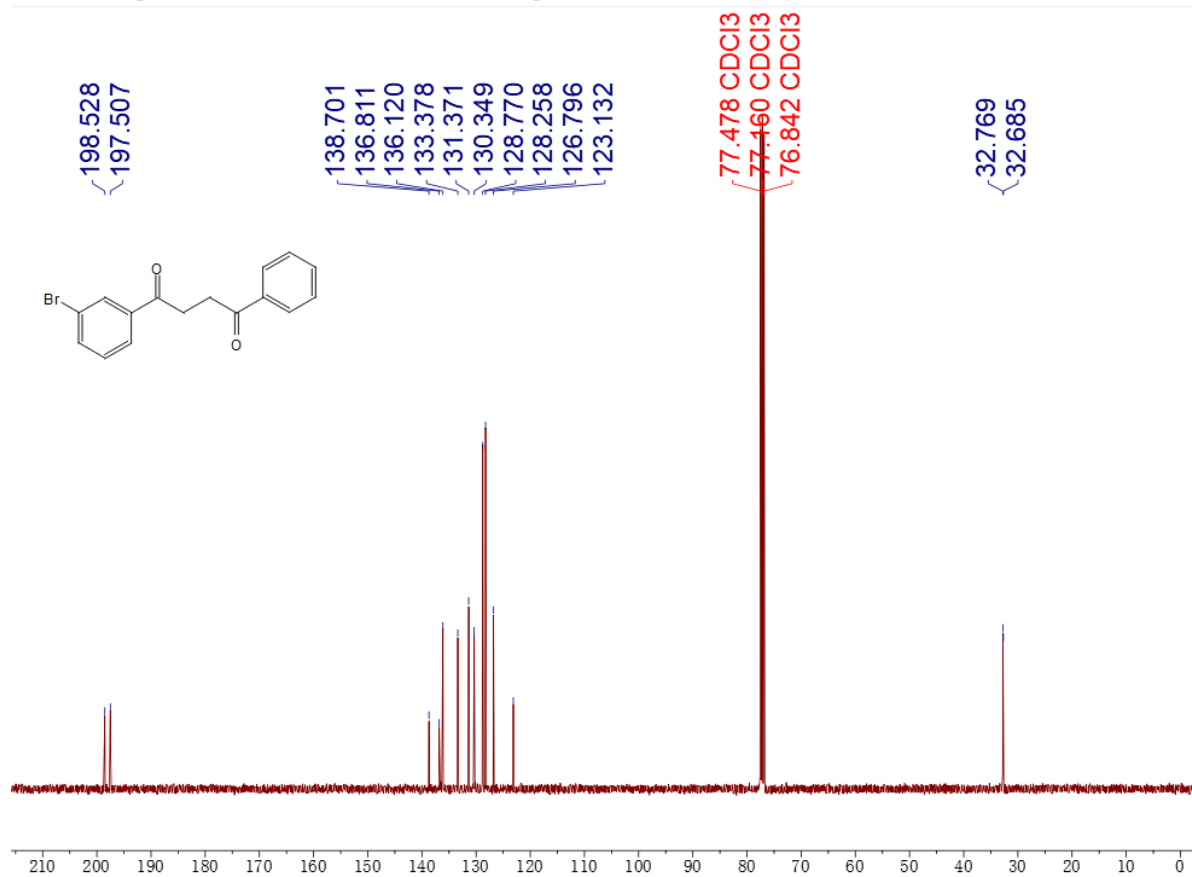

<sup>1</sup>H NMR spectra (400 MHz) in CDCl<sub>3</sub> of compound **3l (3af)**

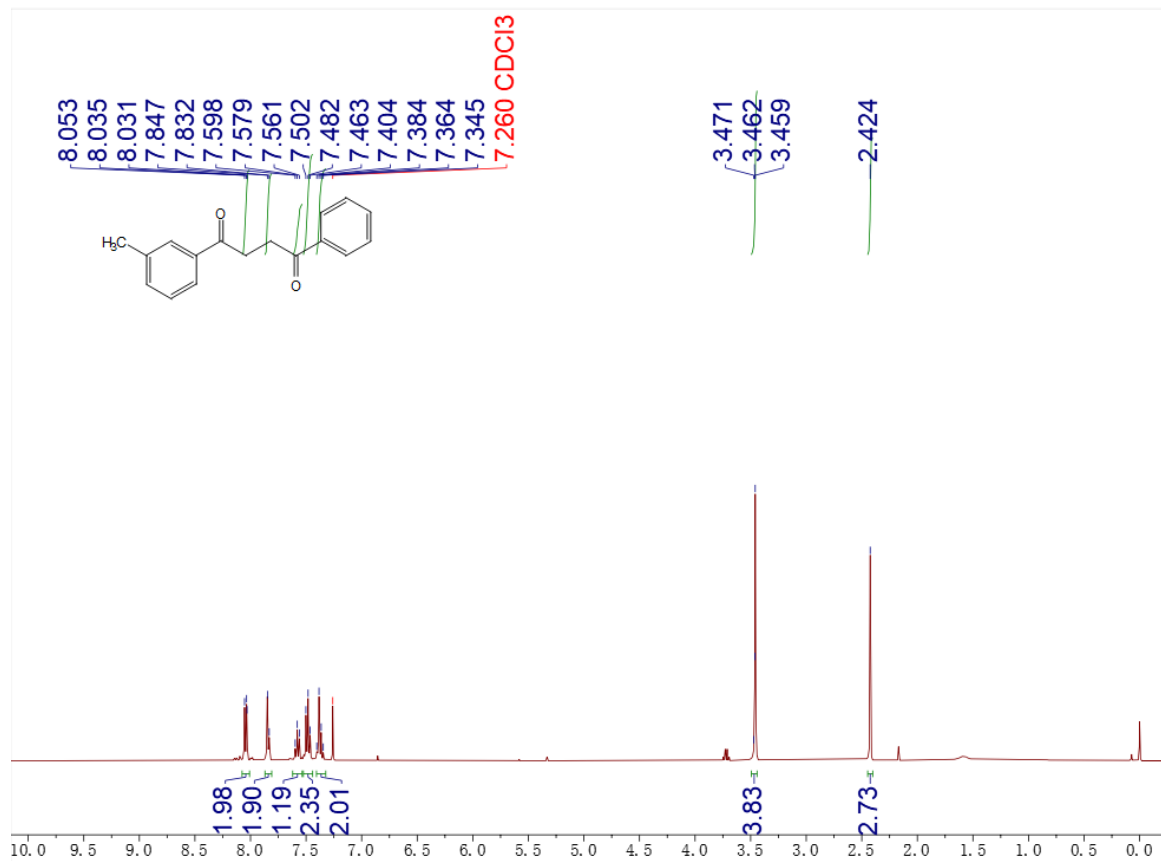

<sup>13</sup>C NMR spectra (400 MHz) in CDCl<sub>3</sub> of compound **3l (3af)**

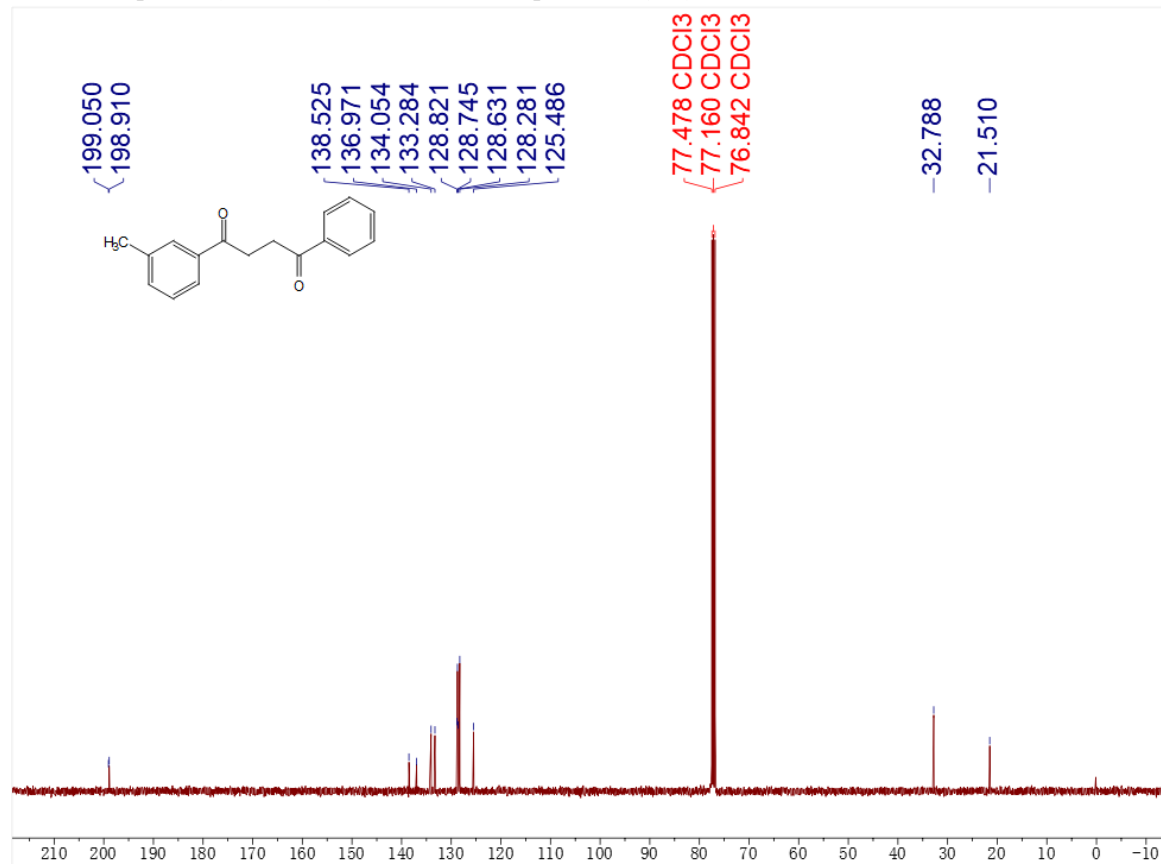

<sup>1</sup>H NMR spectra (400 MHz) in CDCl<sub>3</sub> of compound **3m**

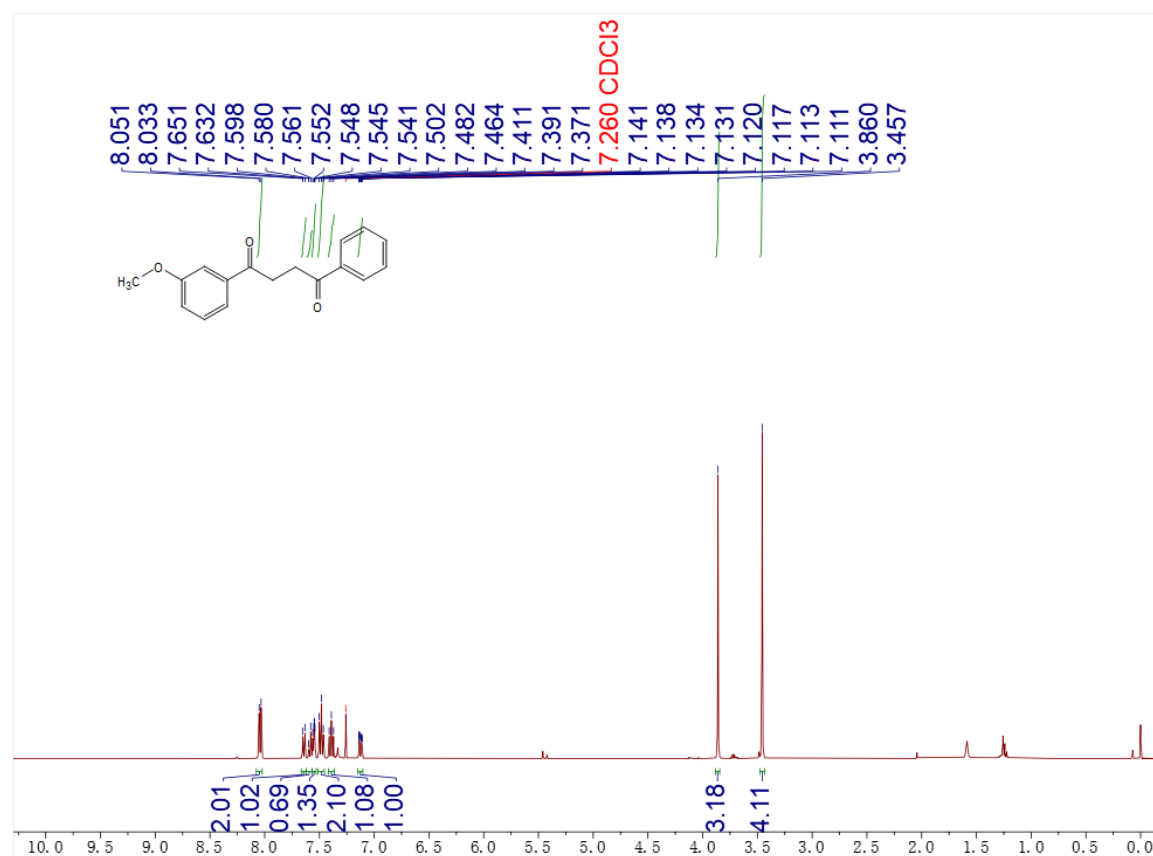

<sup>13</sup>C NMR spectra (400 MHz) in CDCl<sub>3</sub> of compound **3m**

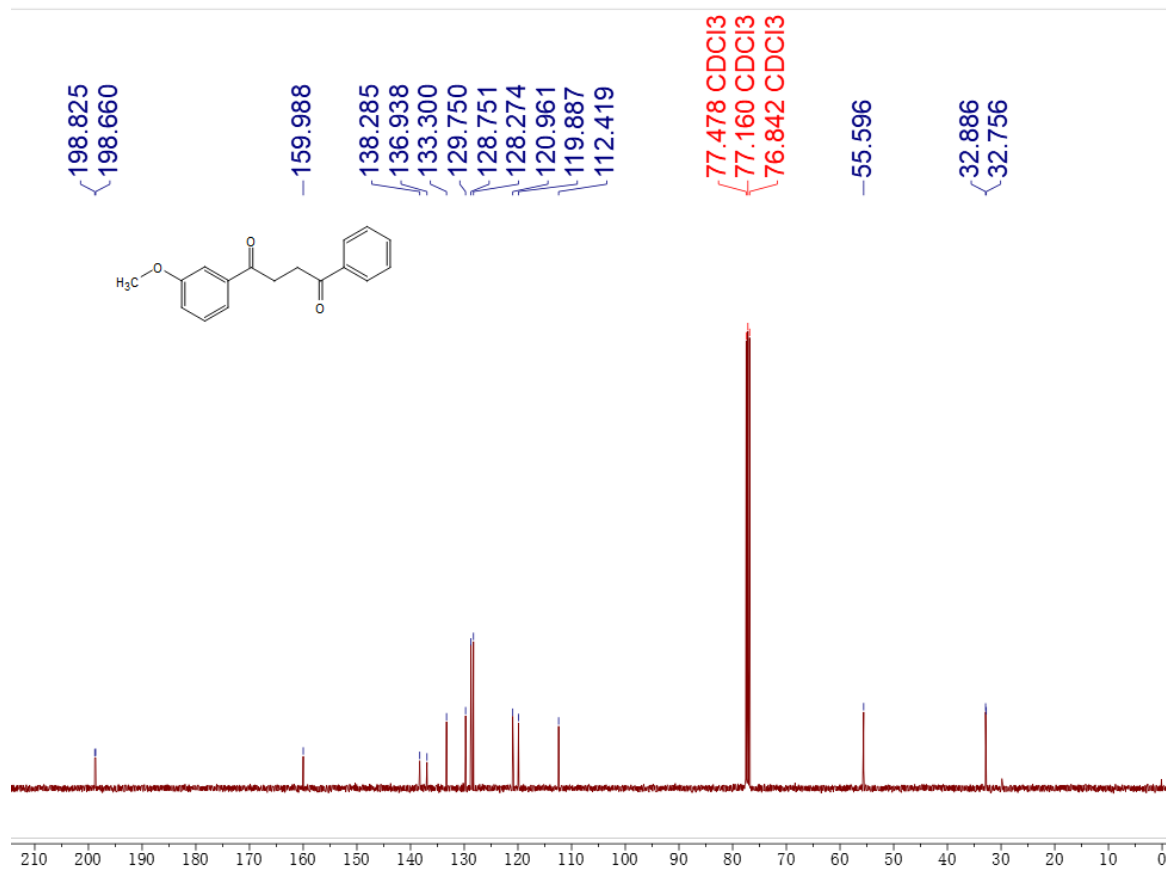

<sup>1</sup>H NMR spectra (400 MHz) in CDCl<sub>3</sub> of compound **3n (3ab)**

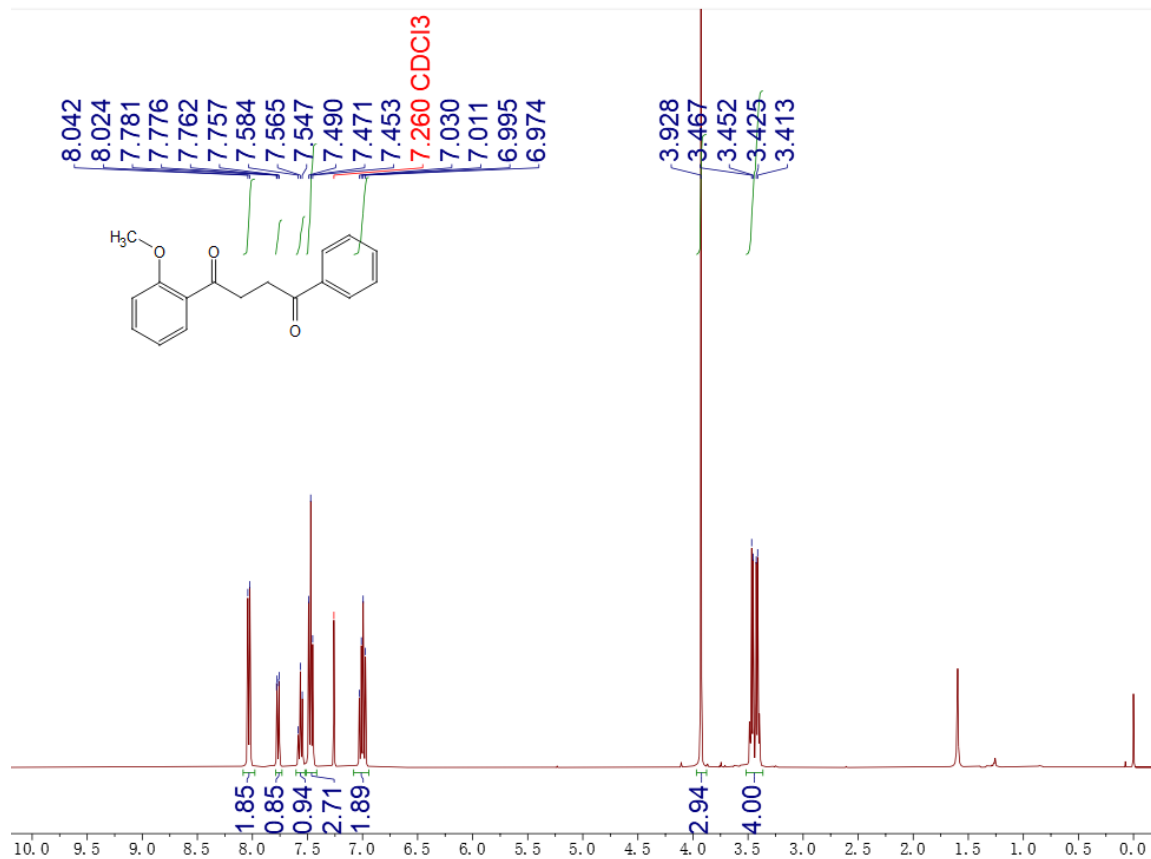

<sup>13</sup>C NMR spectra (400 MHz) in CDCl<sub>3</sub> of compound **3n (3ab)**

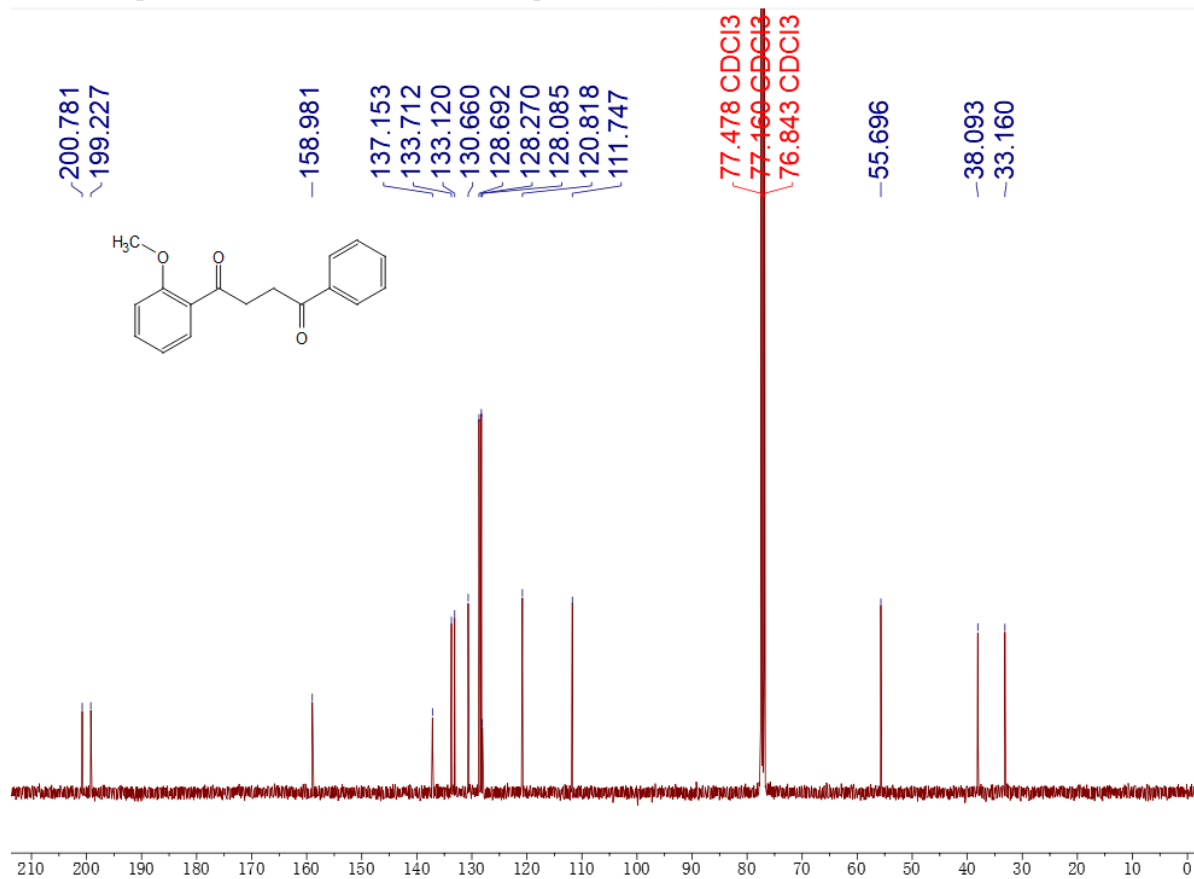

<sup>1</sup>H NMR spectra (400 MHz) in CDCl<sub>3</sub> of compound **3o** (**3ai**)

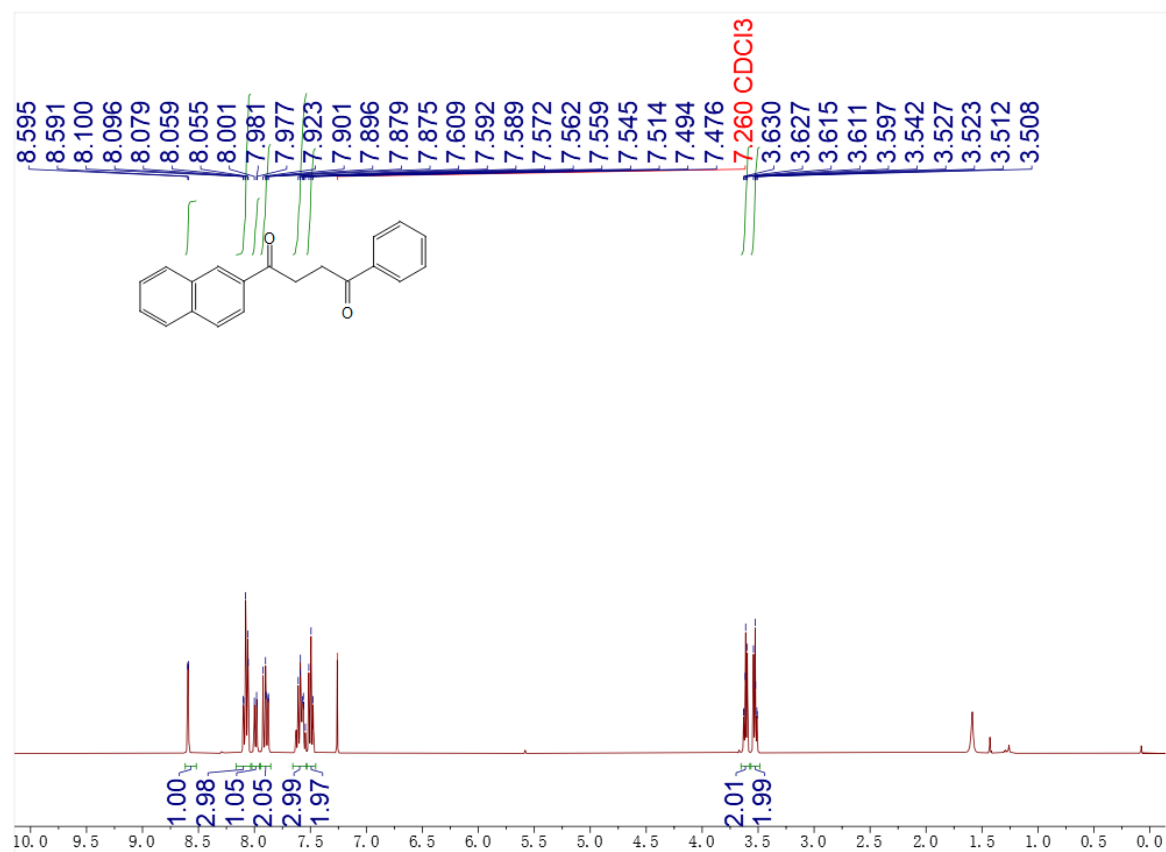

<sup>13</sup>C NMR spectra (400 MHz) in CDCl<sub>3</sub> of compound **3o** (**3ai**)

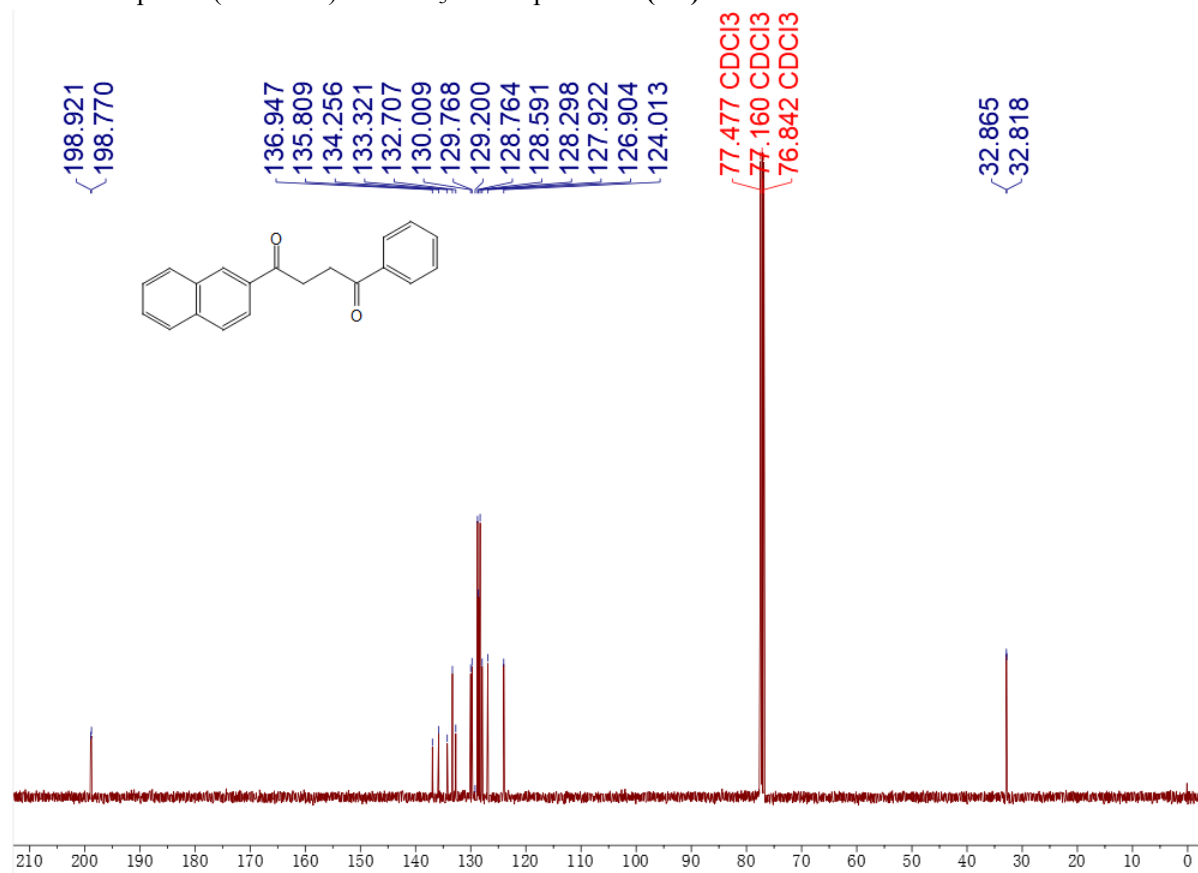



<sup>1</sup>H NMR spectra (400 MHz) in CDCl<sub>3</sub> of compound **3p**

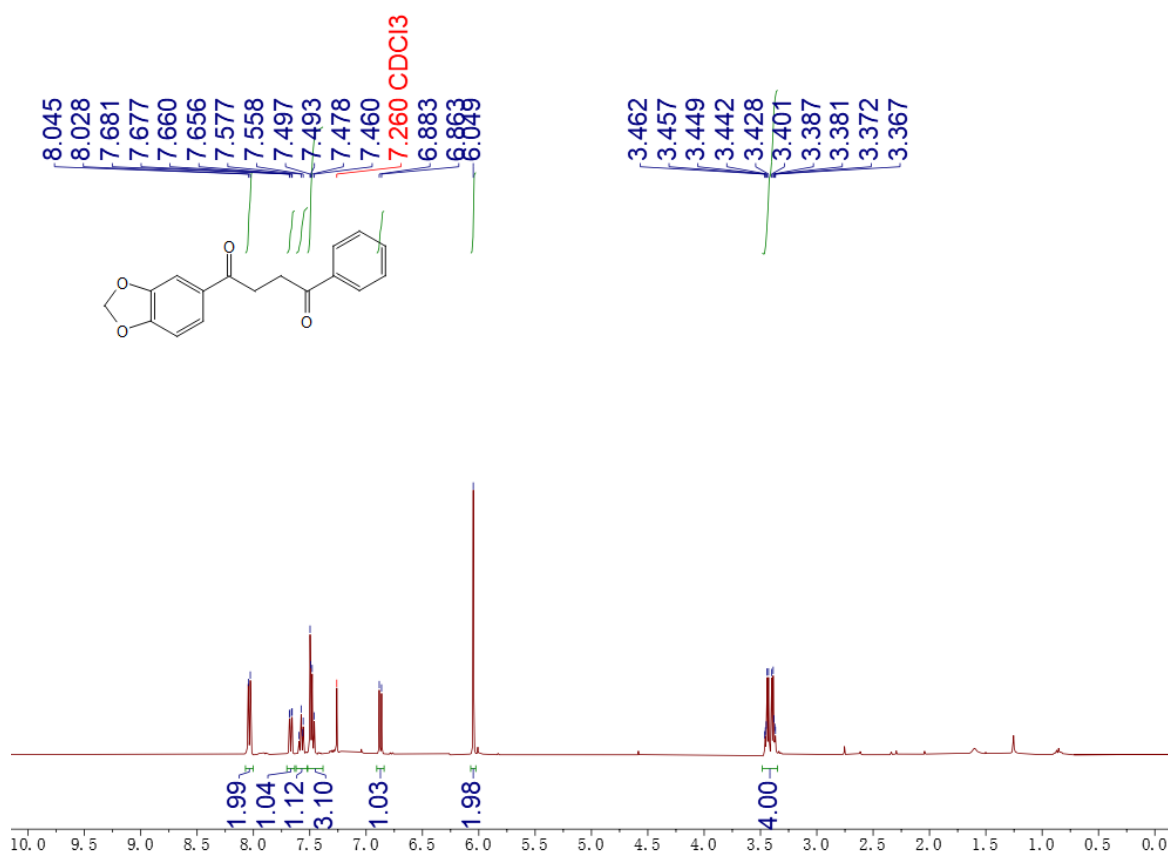

<sup>13</sup>C NMR spectra (400 MHz) in CDCl<sub>3</sub> of compound **3p**

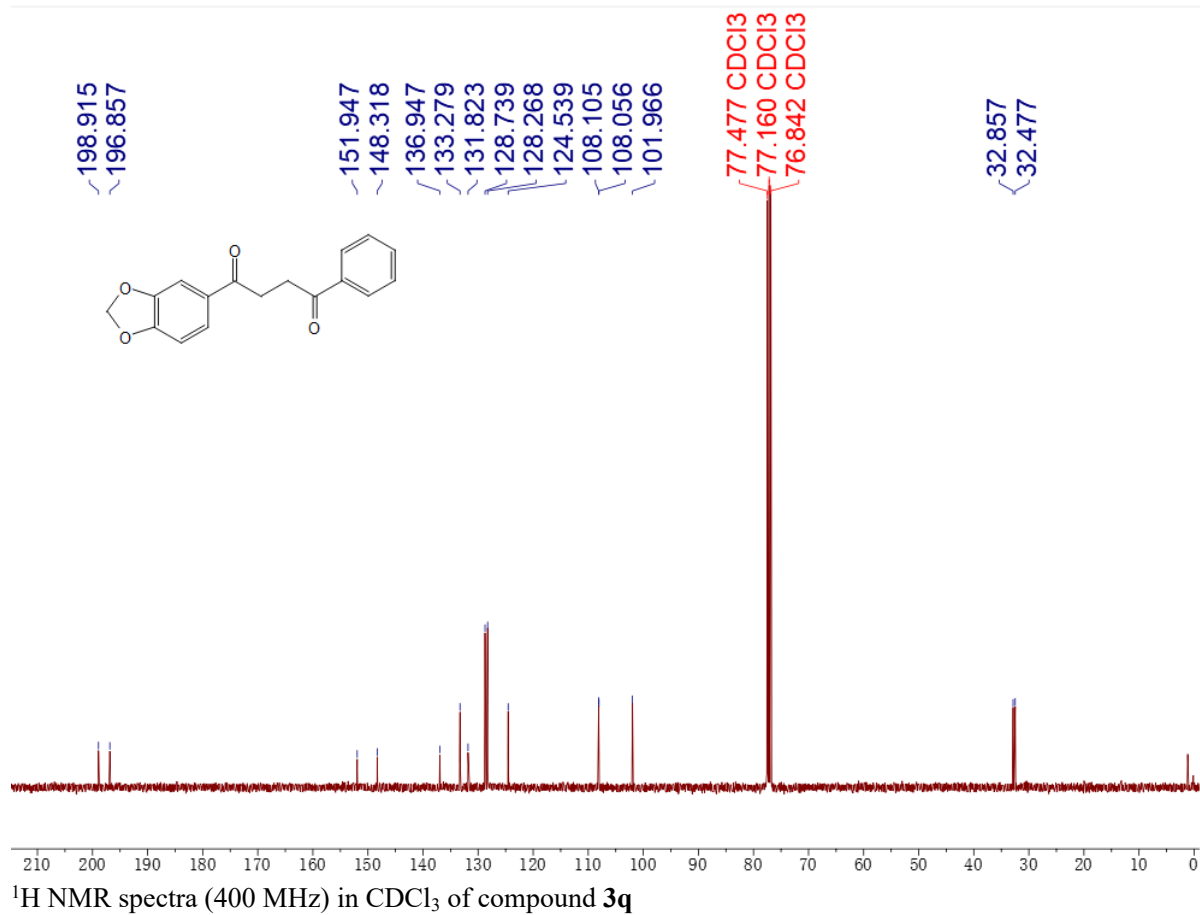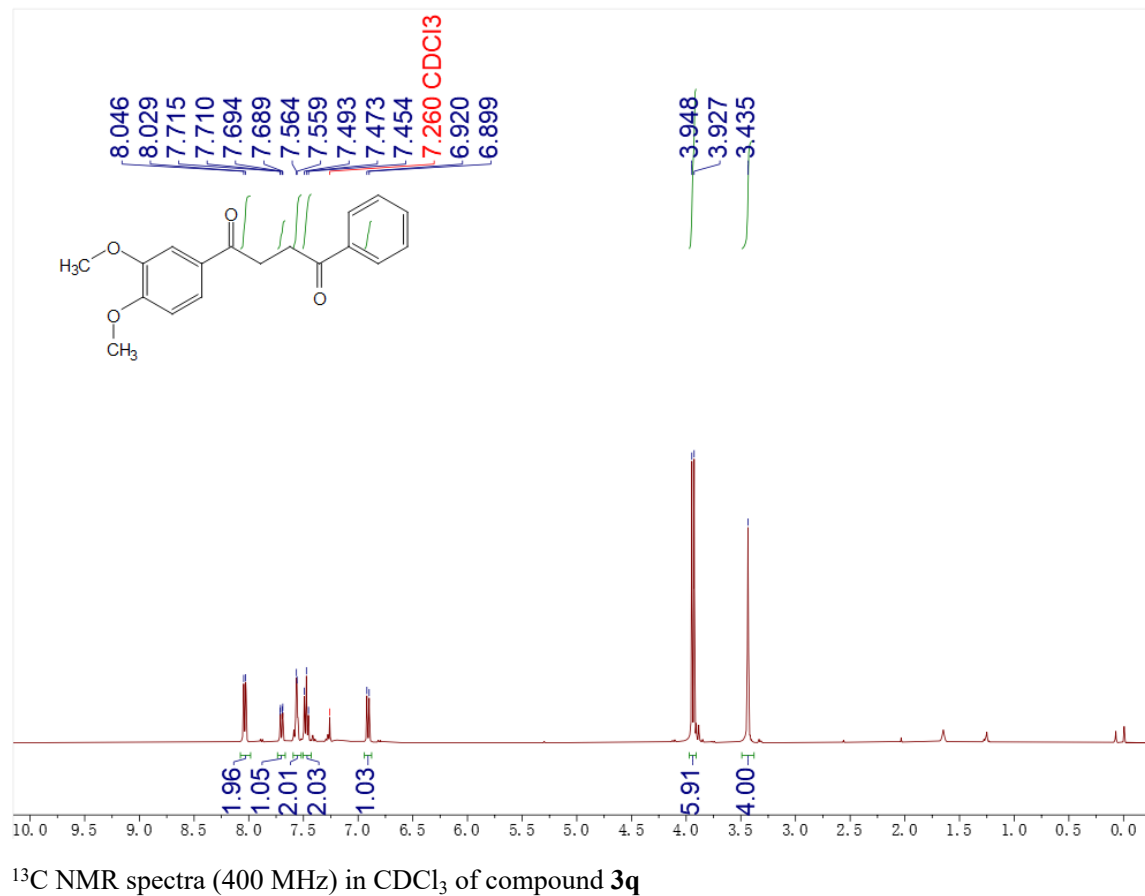

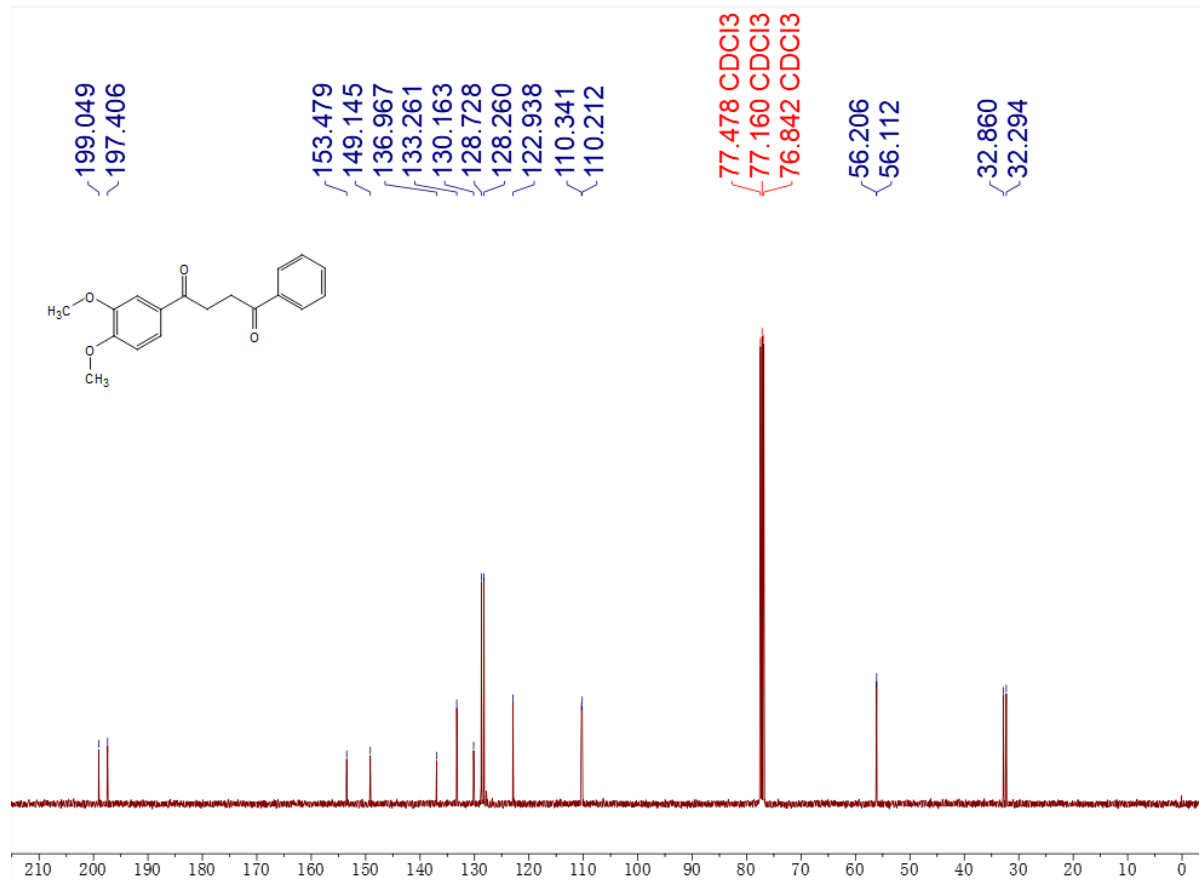

<sup>1</sup>H NMR spectra (400 MHz) in CDCl<sub>3</sub> of compound **3r**

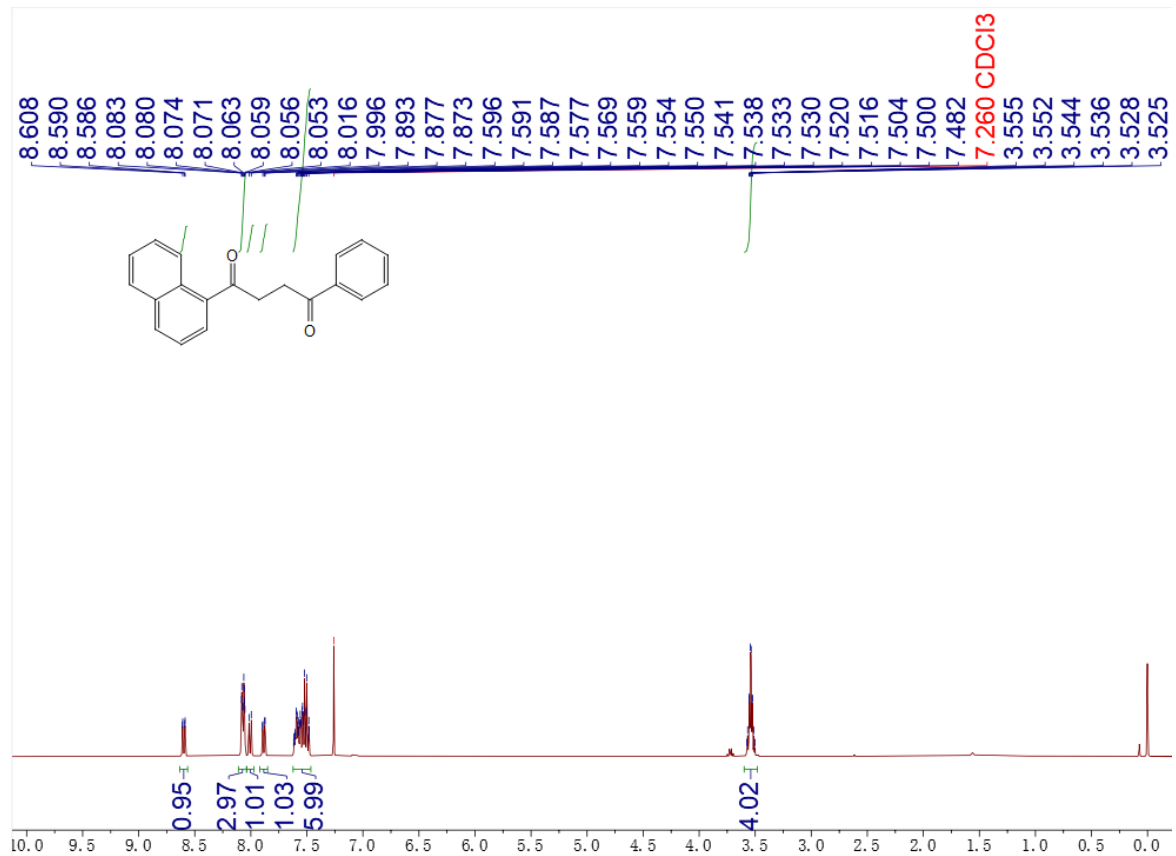

$^{13}\text{C}$  NMR spectra (400 MHz) in  $\text{CDCl}_3$  of compound **3r**

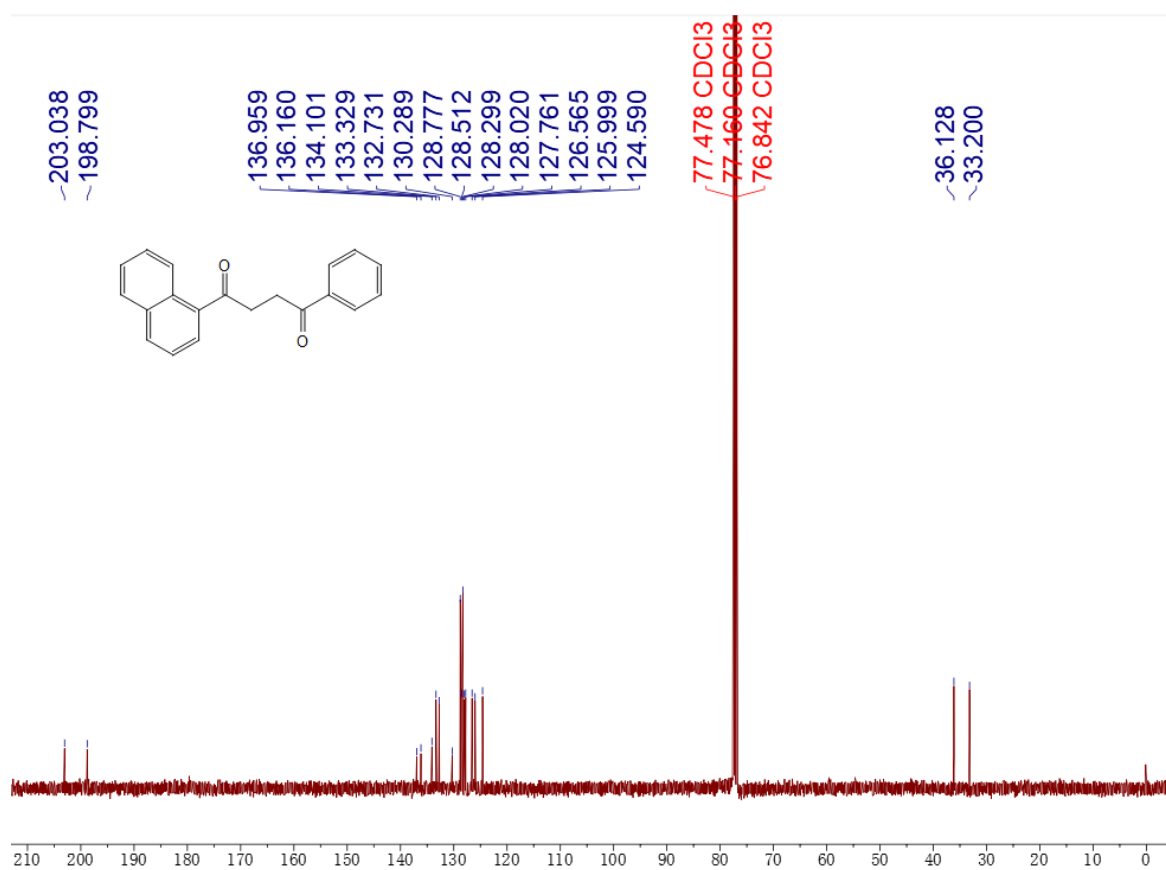

$^1\text{H}$  NMR spectra (400 MHz) in  $\text{CDCl}_3$  of compound **3t**

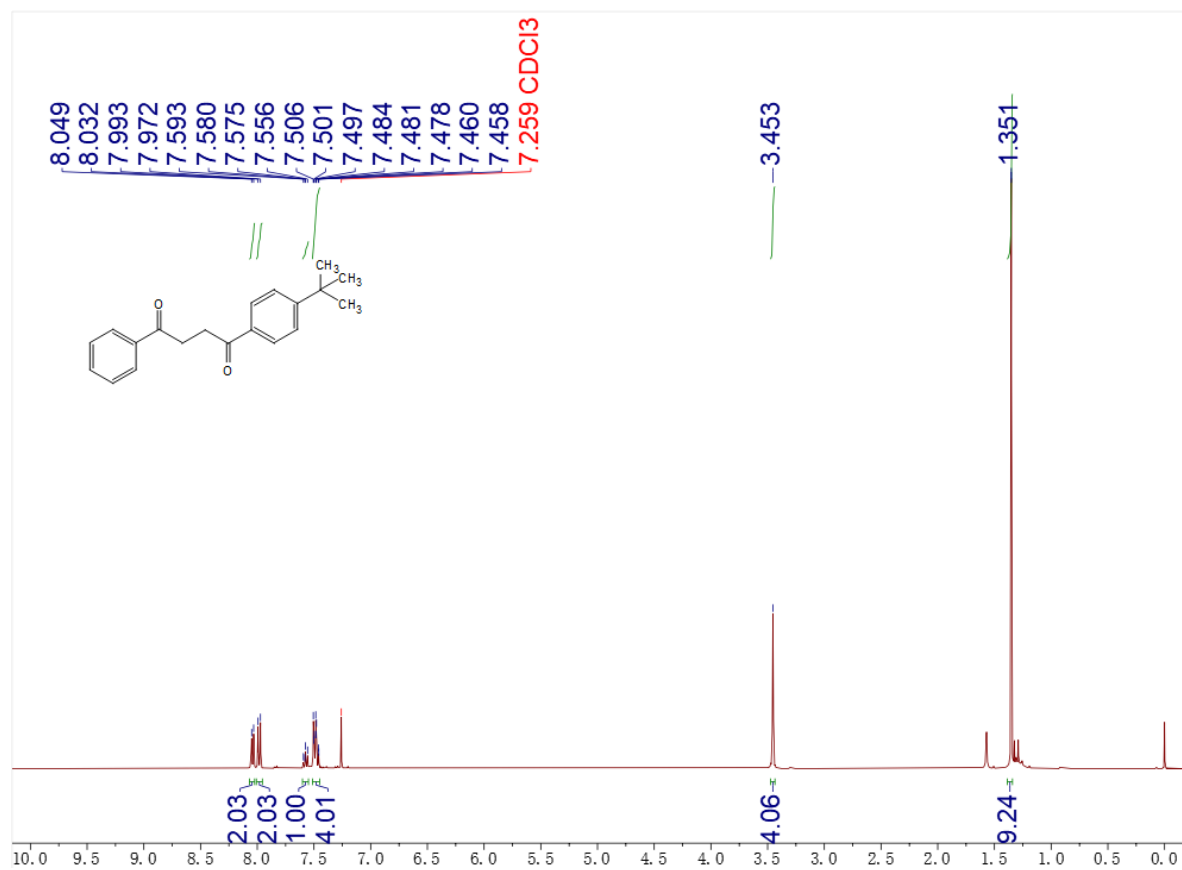

$^{13}\text{C}$  NMR spectra (400 MHz) in  $\text{CDCl}_3$  of compound **3t**

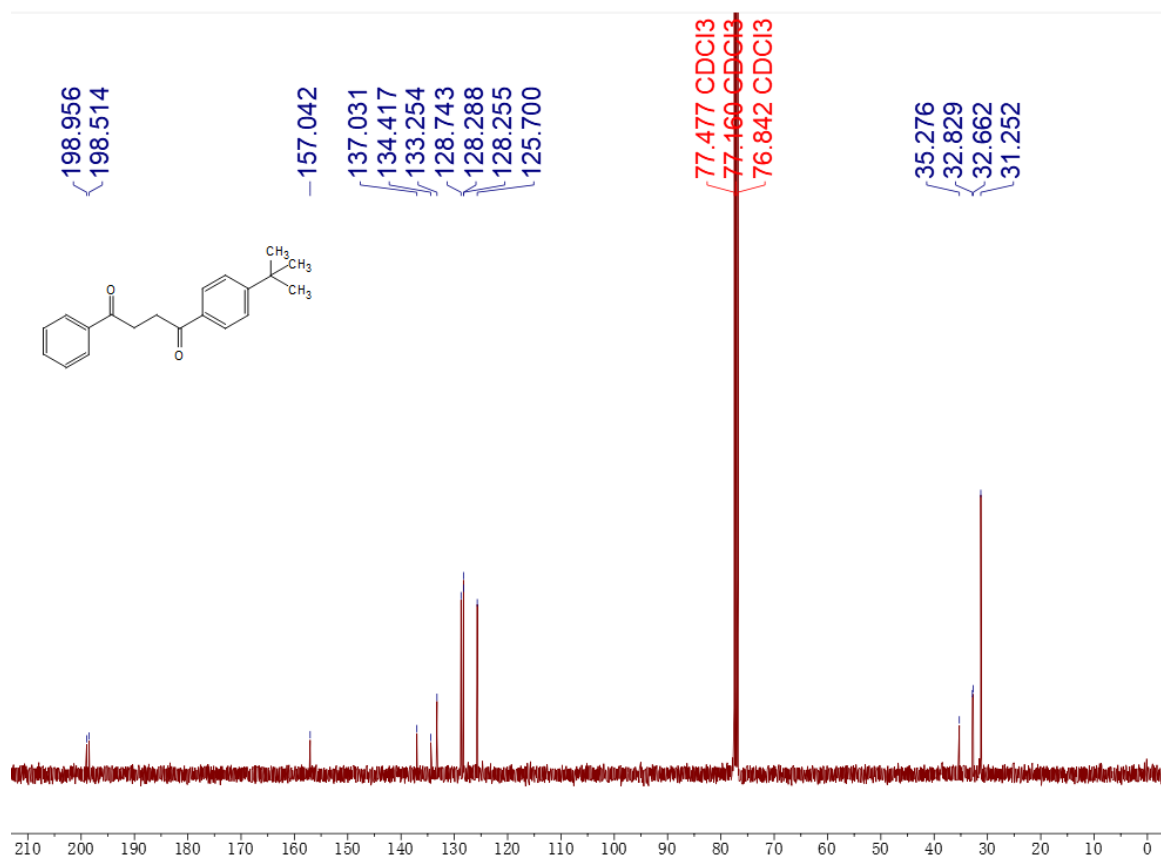

$^1\text{H}$  NMR spectra (400 MHz) in  $\text{CDCl}_3$  of compound **3u**

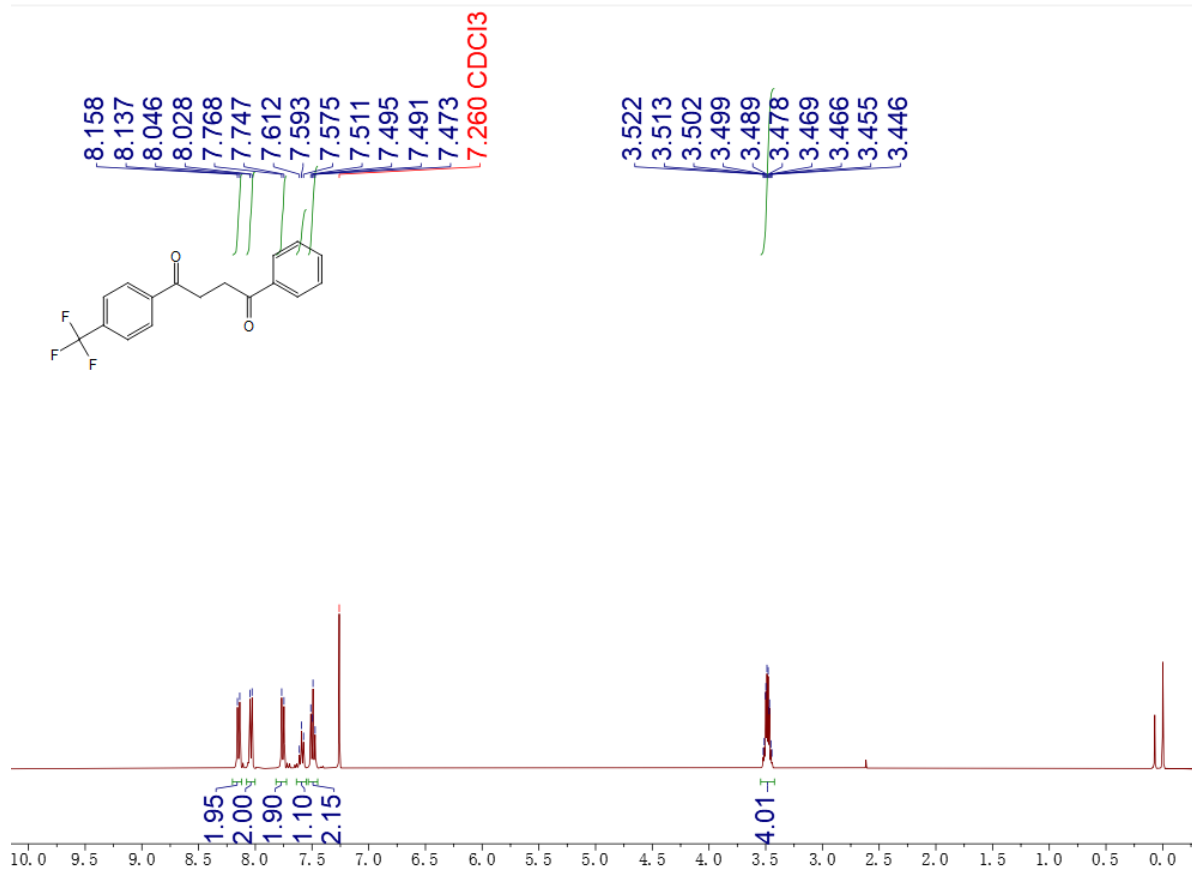

$^{13}\text{C}$  NMR spectra (400 MHz) in  $\text{CDCl}_3$  of compound **3u**

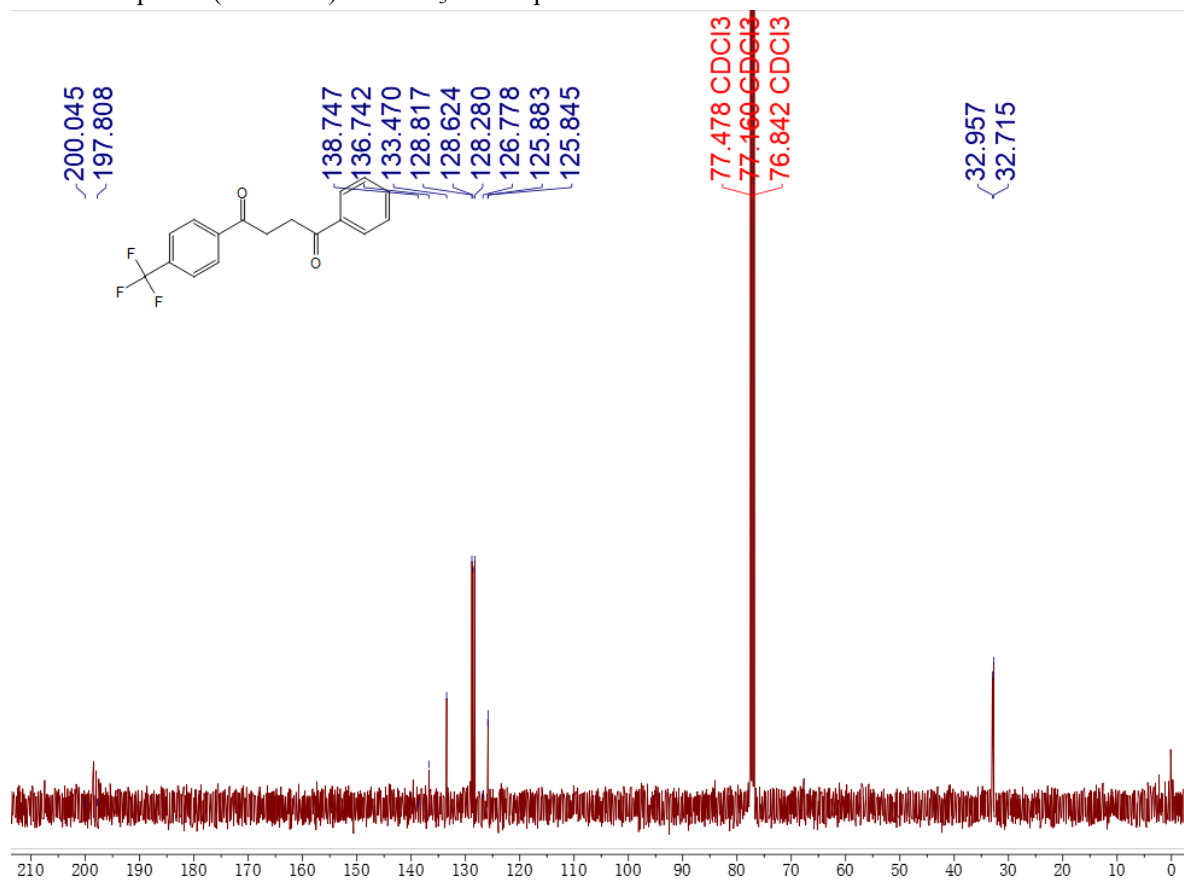

$^1\text{H}$  NMR spectra (400 MHz) in  $\text{CDCl}_3$  of compound **3ac**

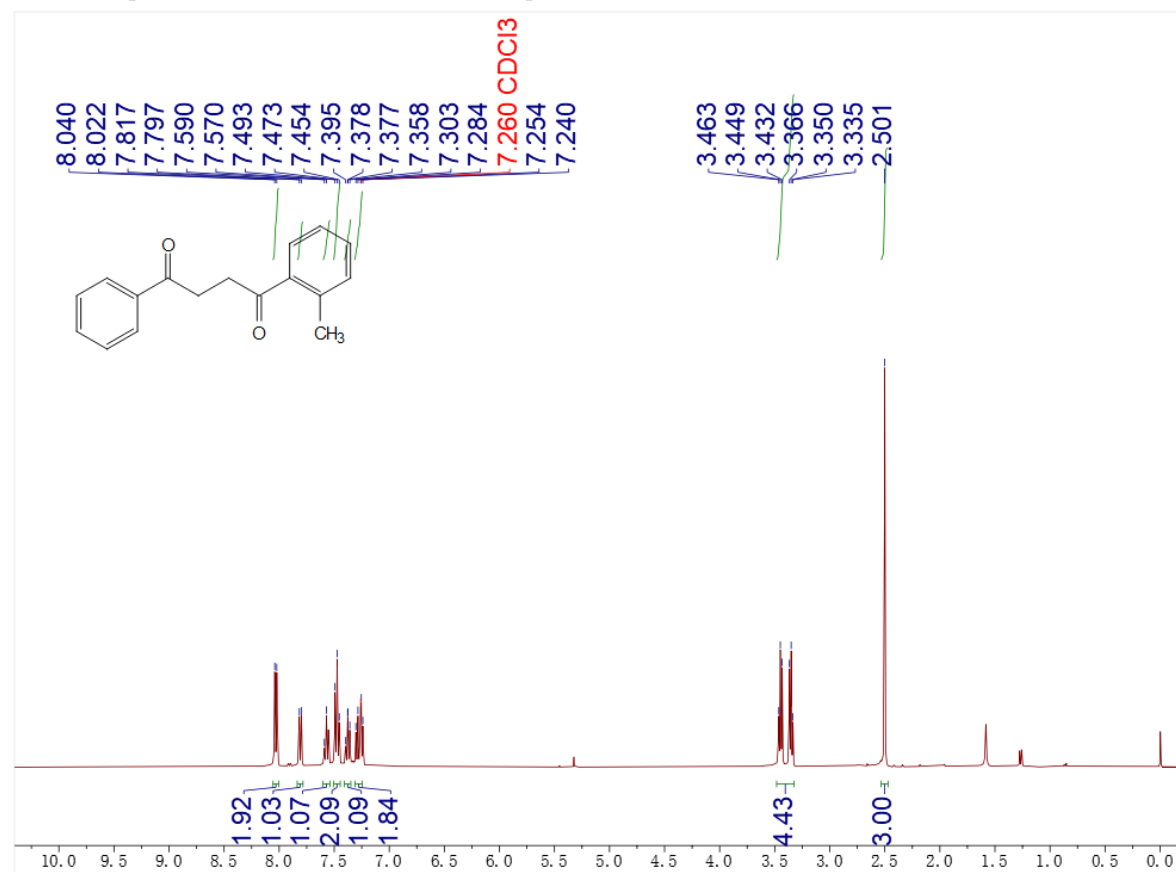

<sup>13</sup>C NMR spectra (400 MHz) in CDCl<sub>3</sub> of compound **3ac**

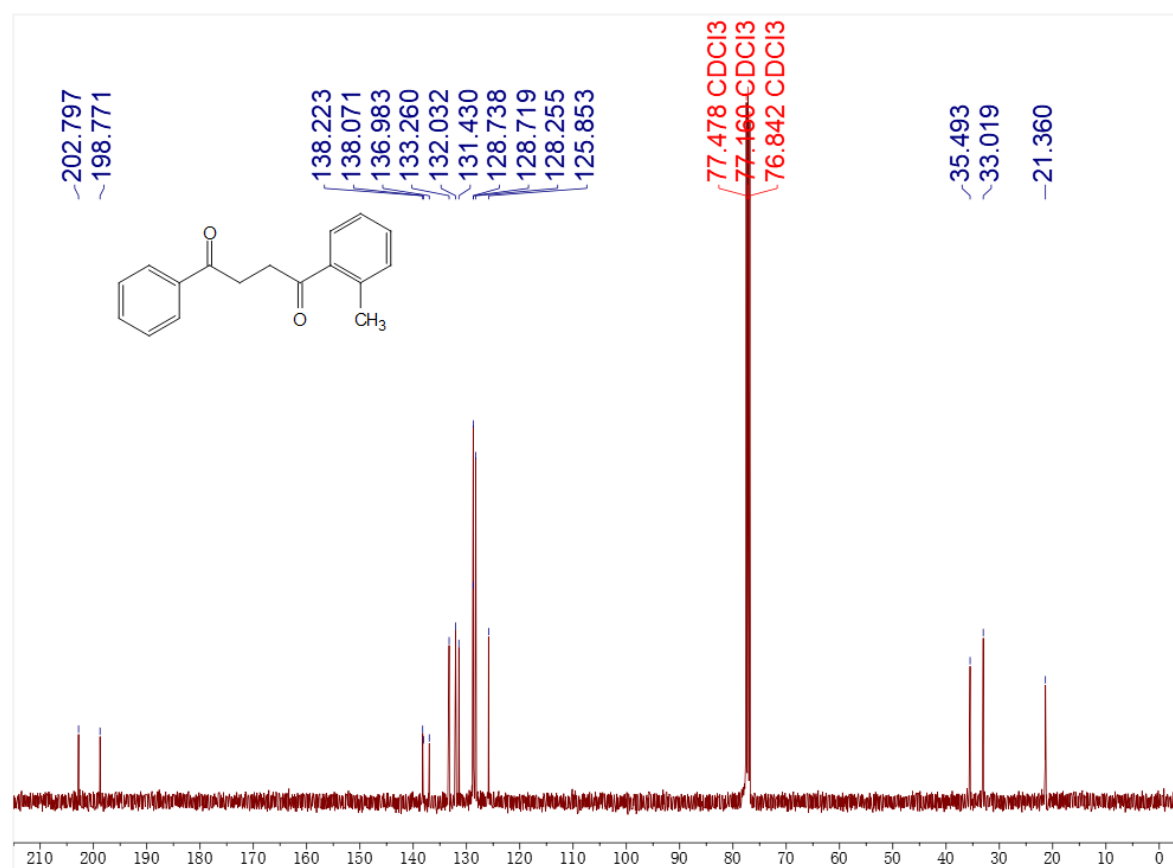

<sup>1</sup>H NMR spectra (400 MHz) in CDCl<sub>3</sub> of compound **3ad**

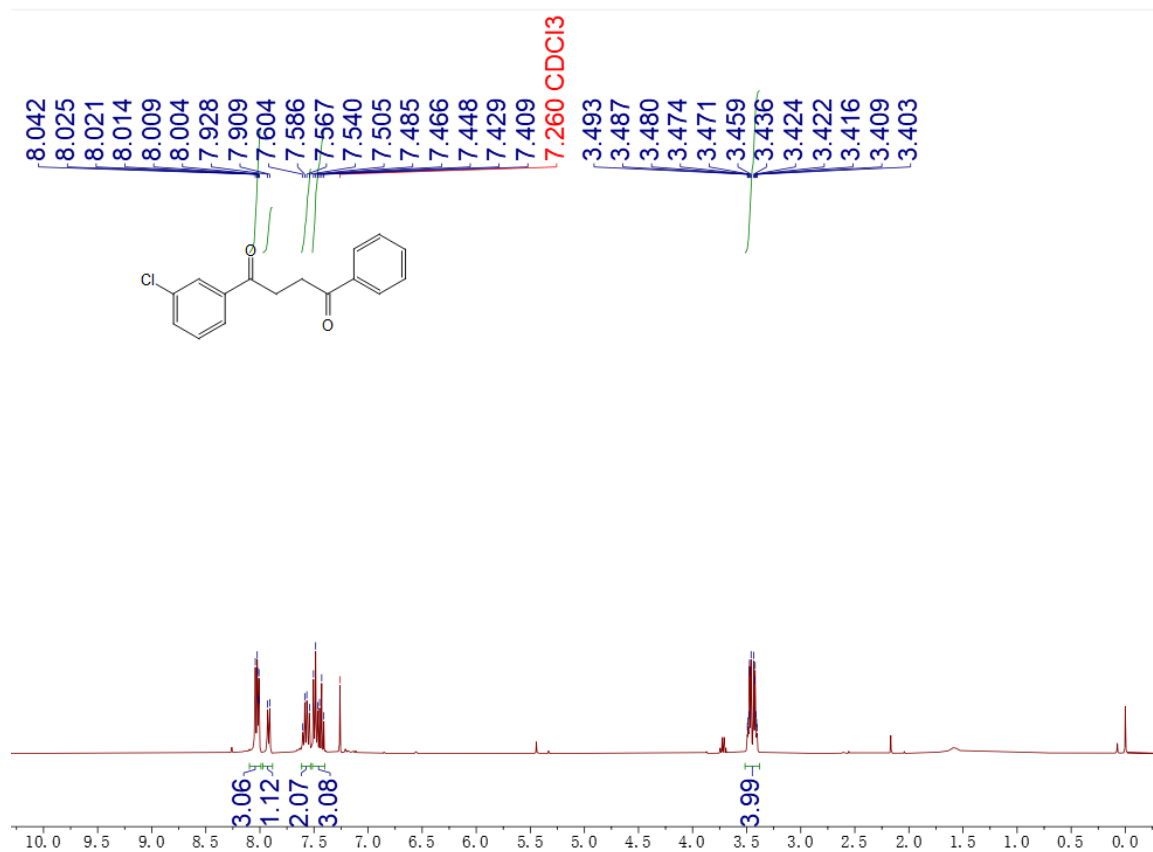

<sup>13</sup>C NMR spectra (400 MHz) in CDCl<sub>3</sub> of compound **3ad**

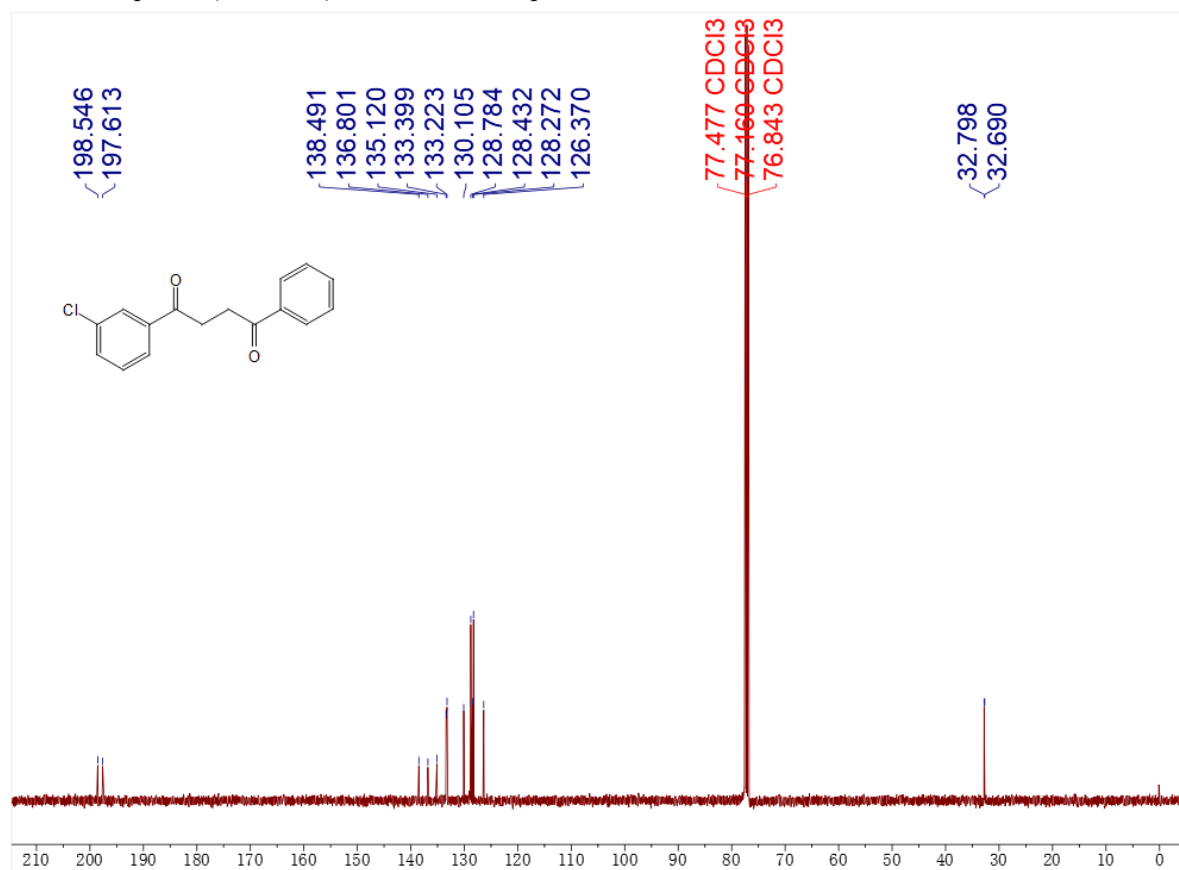

<sup>1</sup>H NMR spectra (400 MHz) in CDCl<sub>3</sub> of compound **3ag**

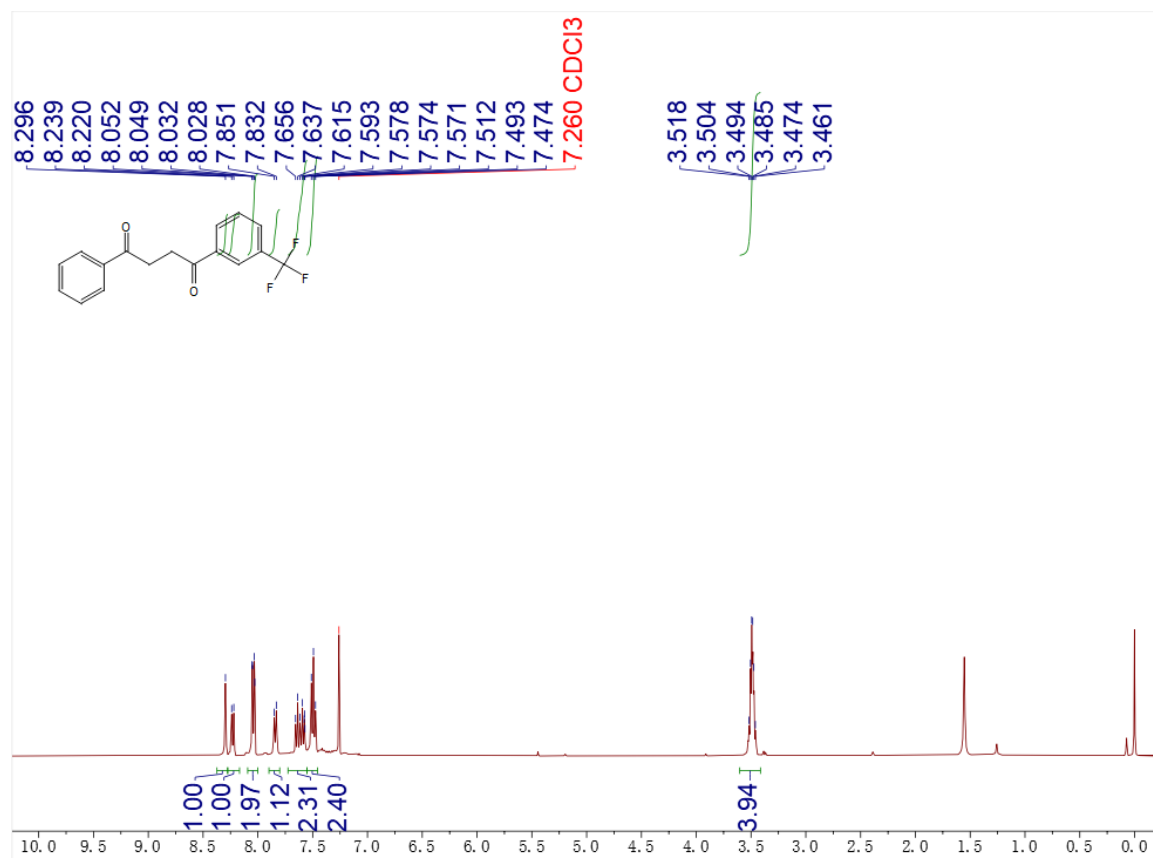



<sup>13</sup>C NMR spectra (400 MHz) in CDCl<sub>3</sub> of compound **3ag**

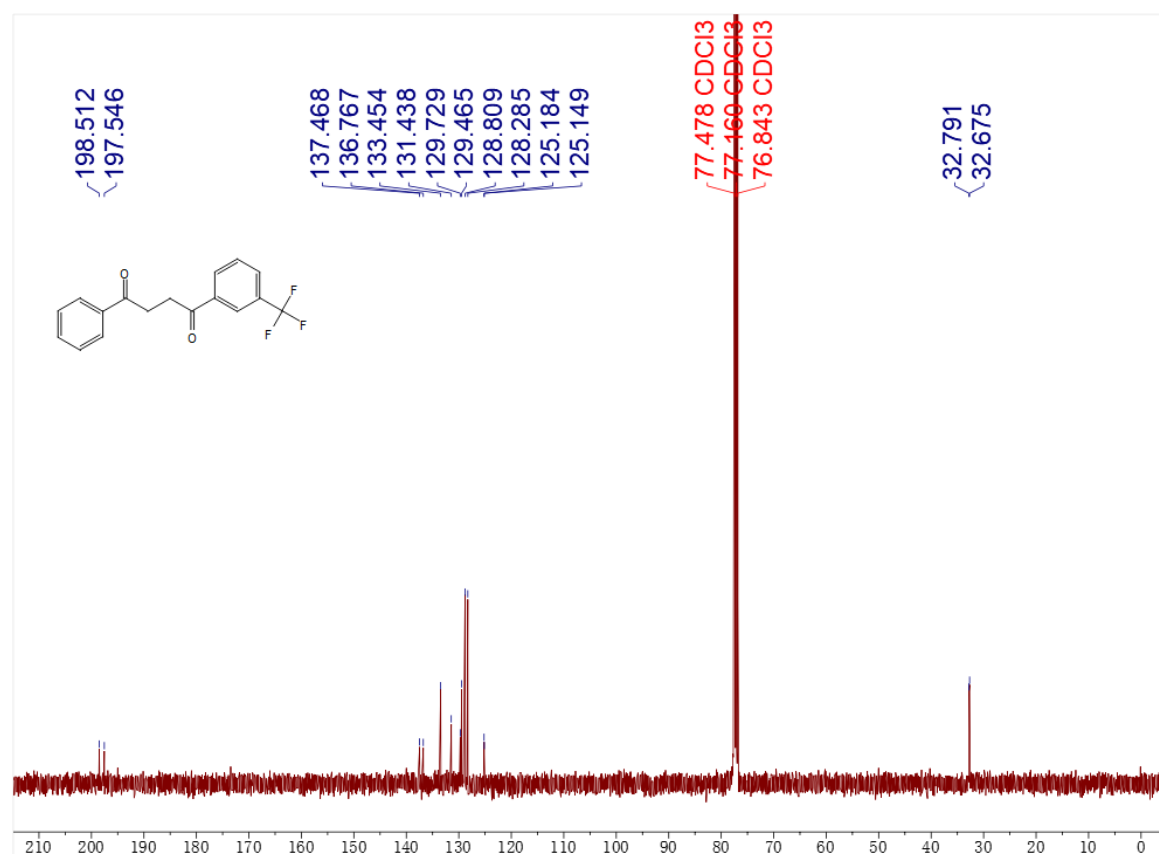

<sup>1</sup>H NMR spectra (400 MHz) in CDCl<sub>3</sub> of compound **3ah**

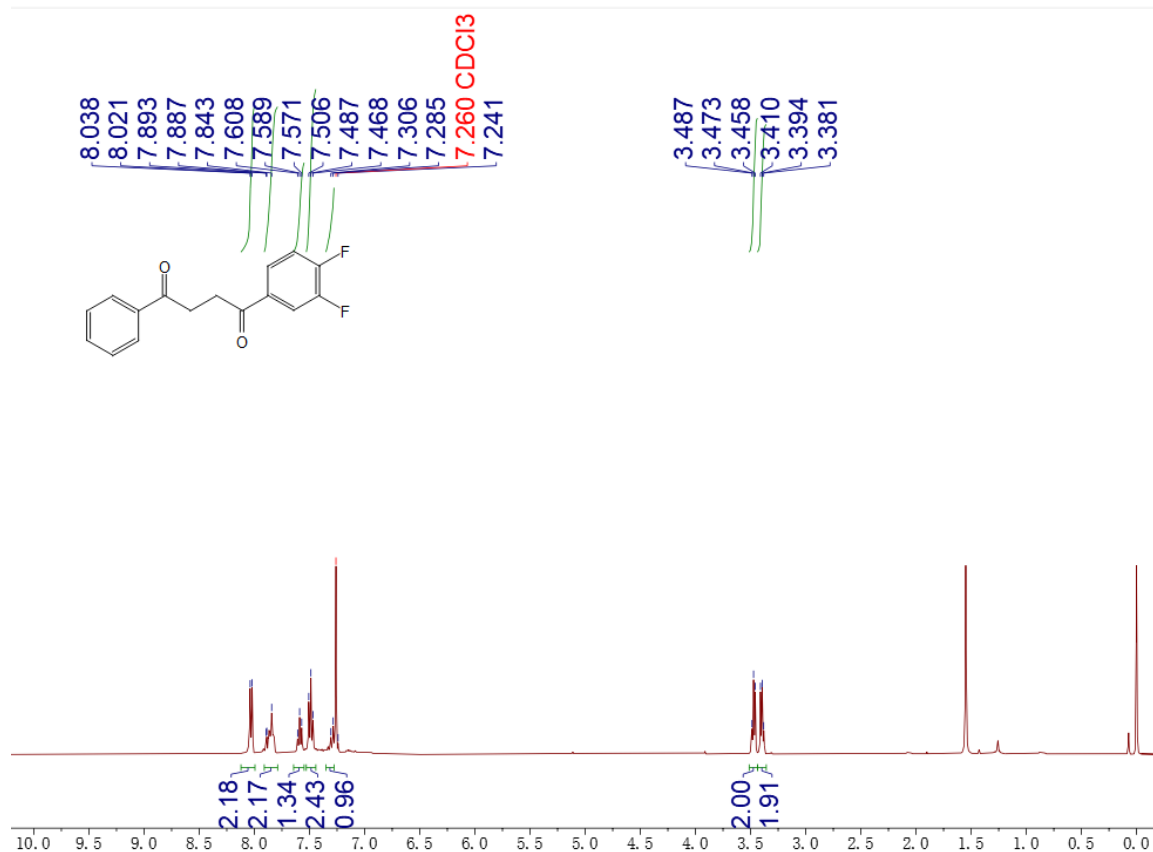

<sup>13</sup>C NMR spectra (400 MHz) in CDCl<sub>3</sub> of compound **3ah**

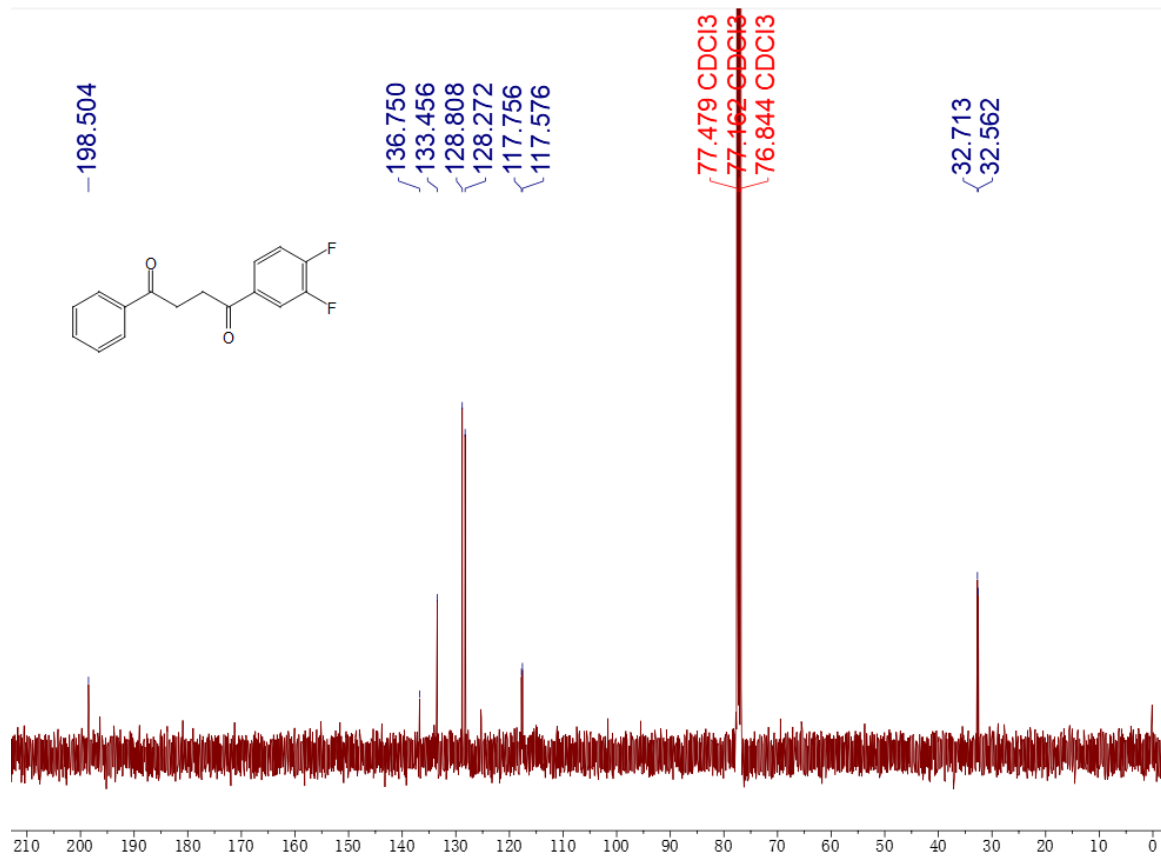

<sup>1</sup>H NMR spectra (400 MHz) in CDCl<sub>3</sub> of compound **11**

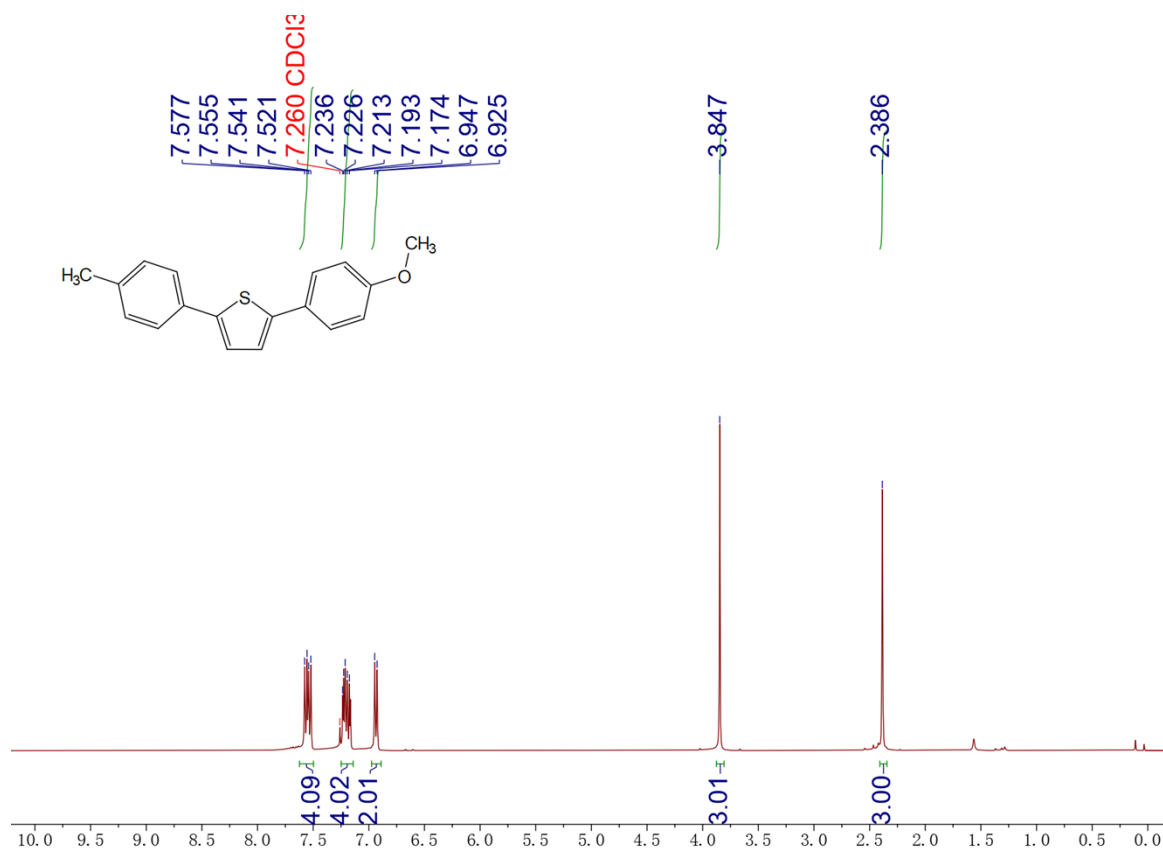

<sup>13</sup>C NMR spectra (600 MHz) in CDCl<sub>3</sub> of compound **11**

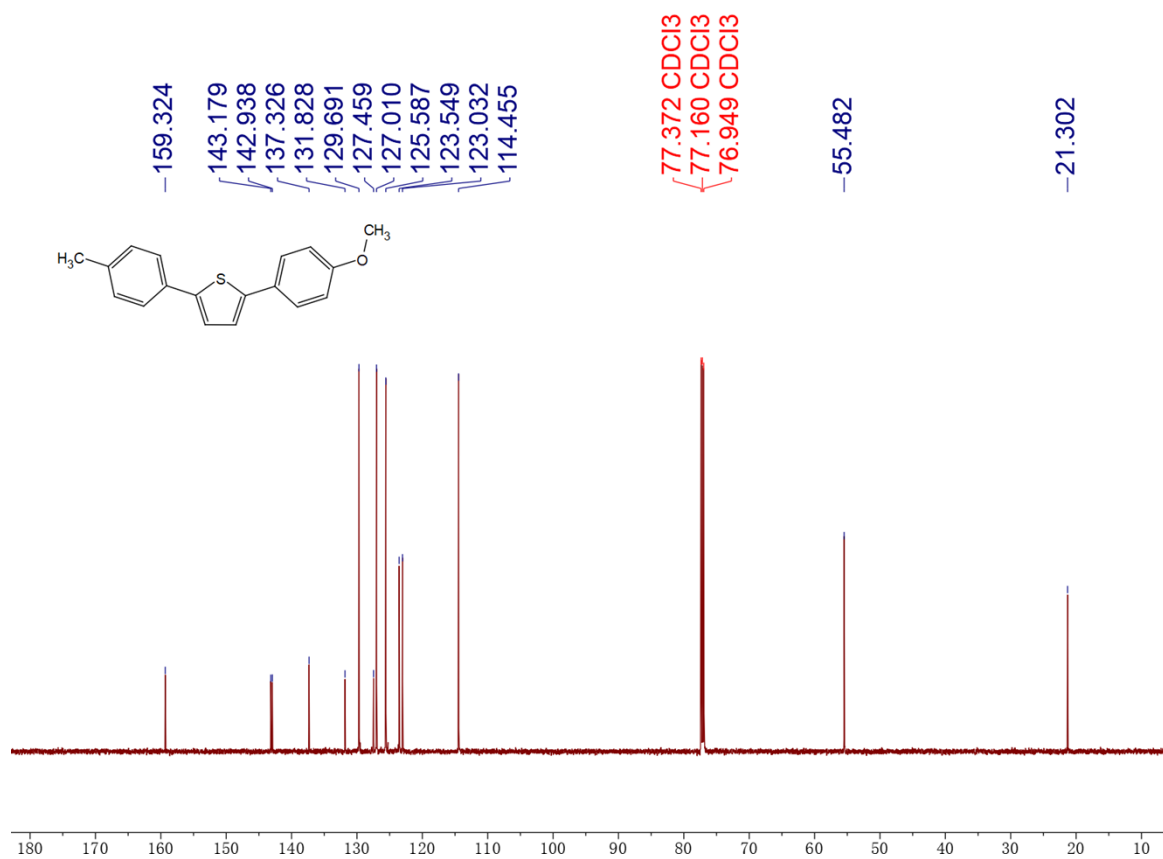

<sup>1</sup>H NMR spectra (400 MHz) in CDCl<sub>3</sub> of compound **12**

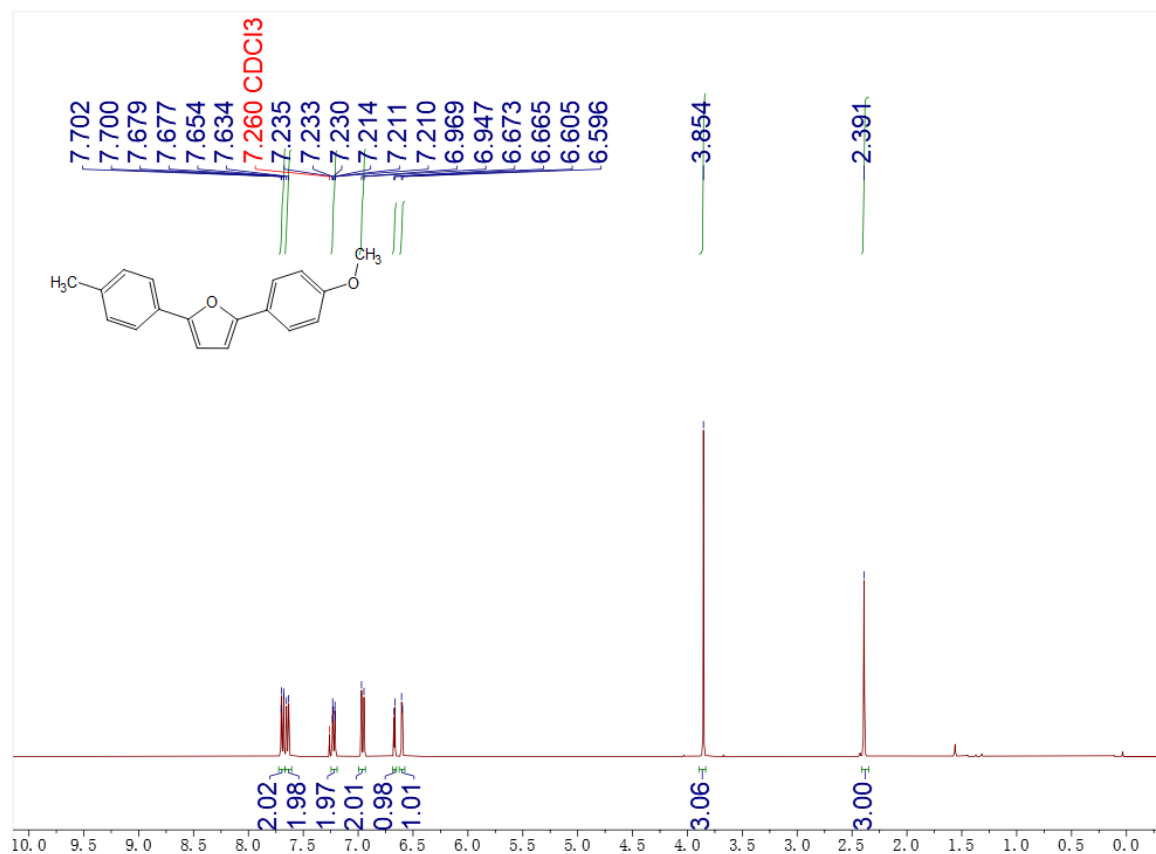

<sup>13</sup>C NMR spectra (400 MHz) in CDCl<sub>3</sub> of compound **12**

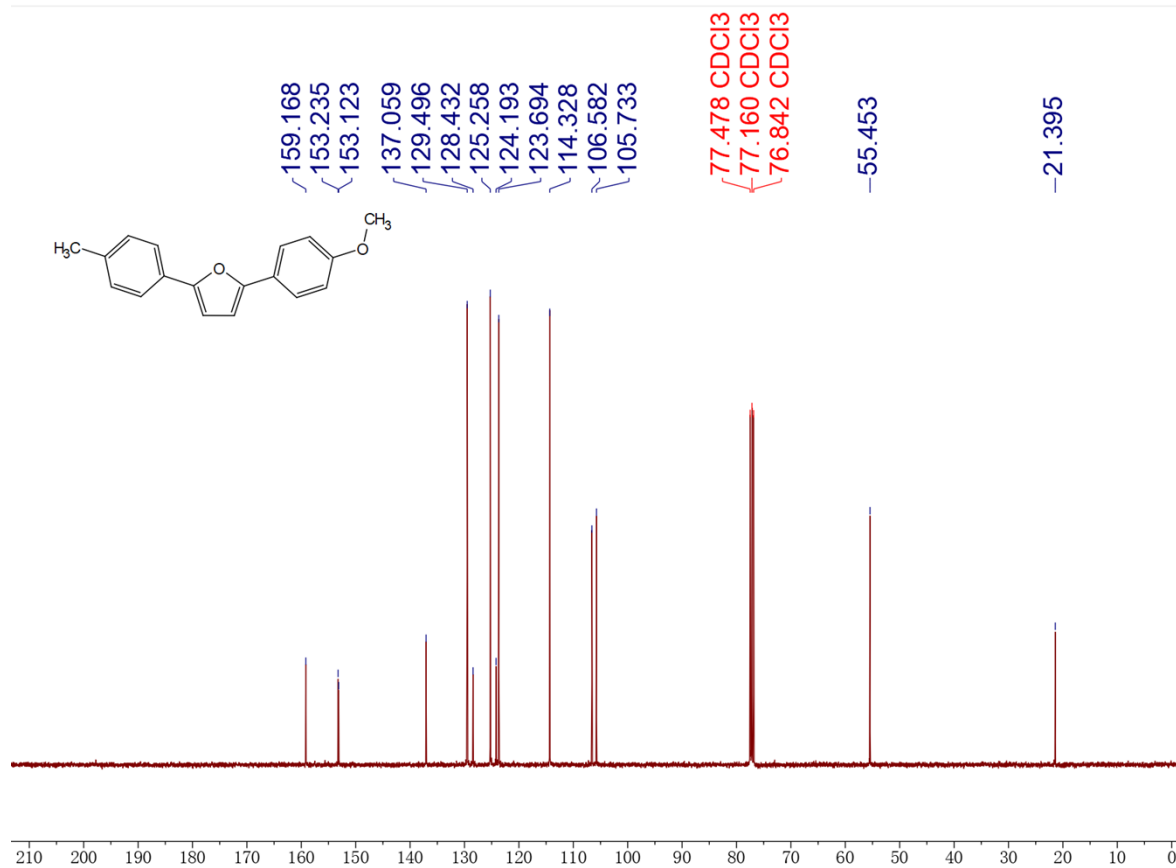

<sup>1</sup>H NMR spectra (400 MHz) in CDCl<sub>3</sub> of compound **13**

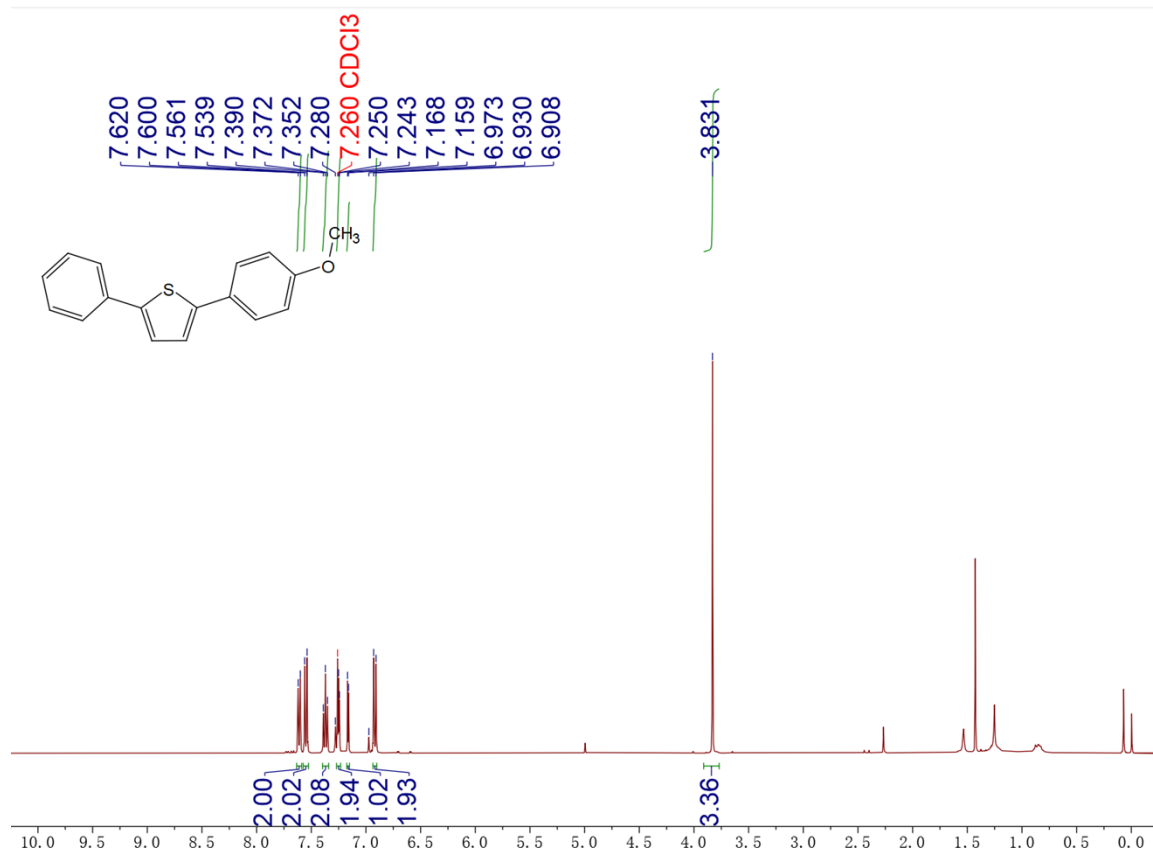

<sup>13</sup>C NMR spectra (400 MHz) in CDCl<sub>3</sub> of compound **13**

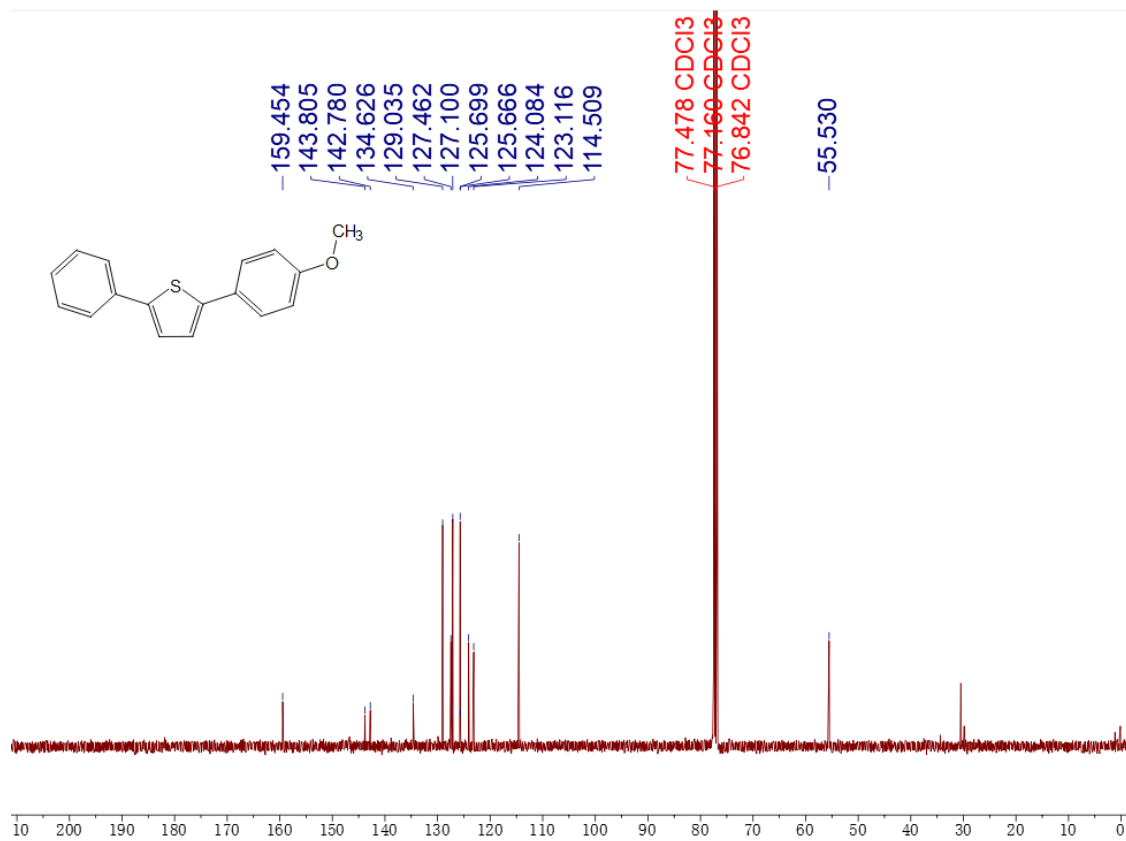

<sup>1</sup>H NMR spectra (400 MHz) in CDCl<sub>3</sub> of compound **14**

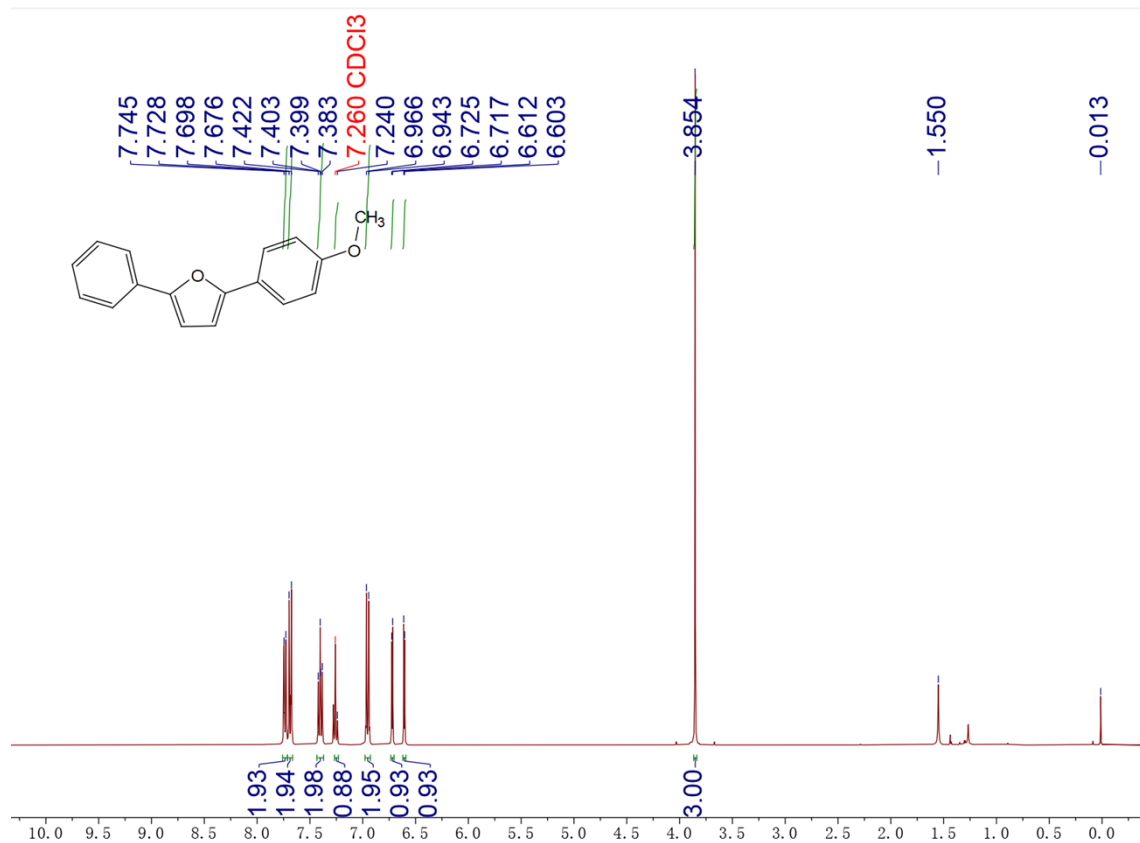

<sup>13</sup>C NMR spectra (400 MHz) in CDCl<sub>3</sub> of compound **14**

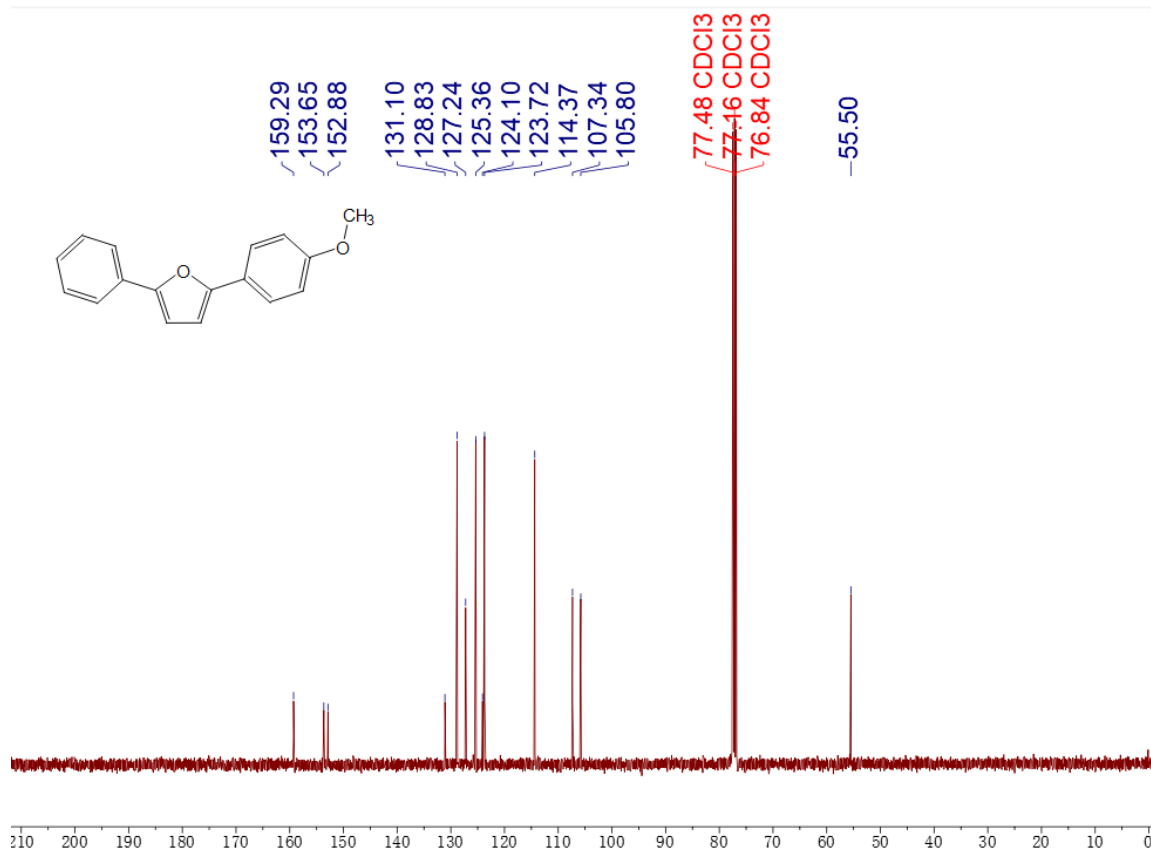

<sup>1</sup>H NMR spectra (600 MHz) in CDCl<sub>3</sub> of compound **15**

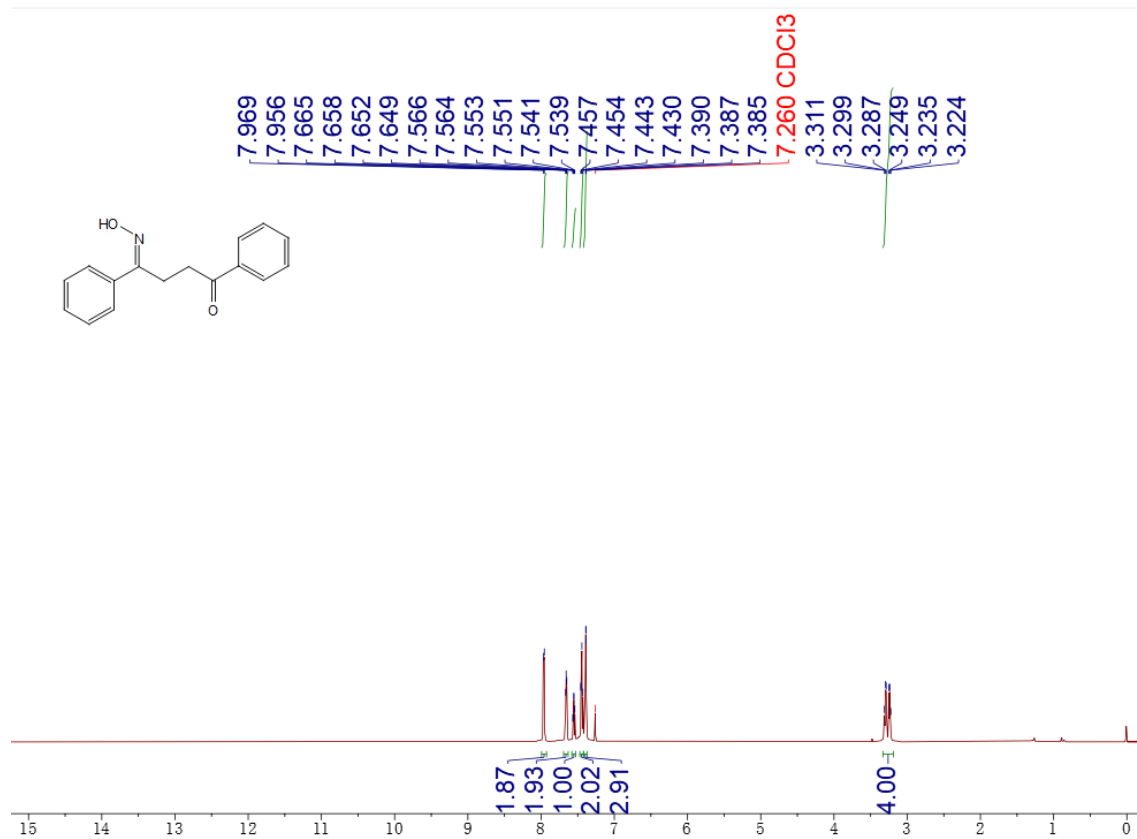

<sup>13</sup>C NMR spectra (400 MHz) in CDCl<sub>3</sub> of compound **15**

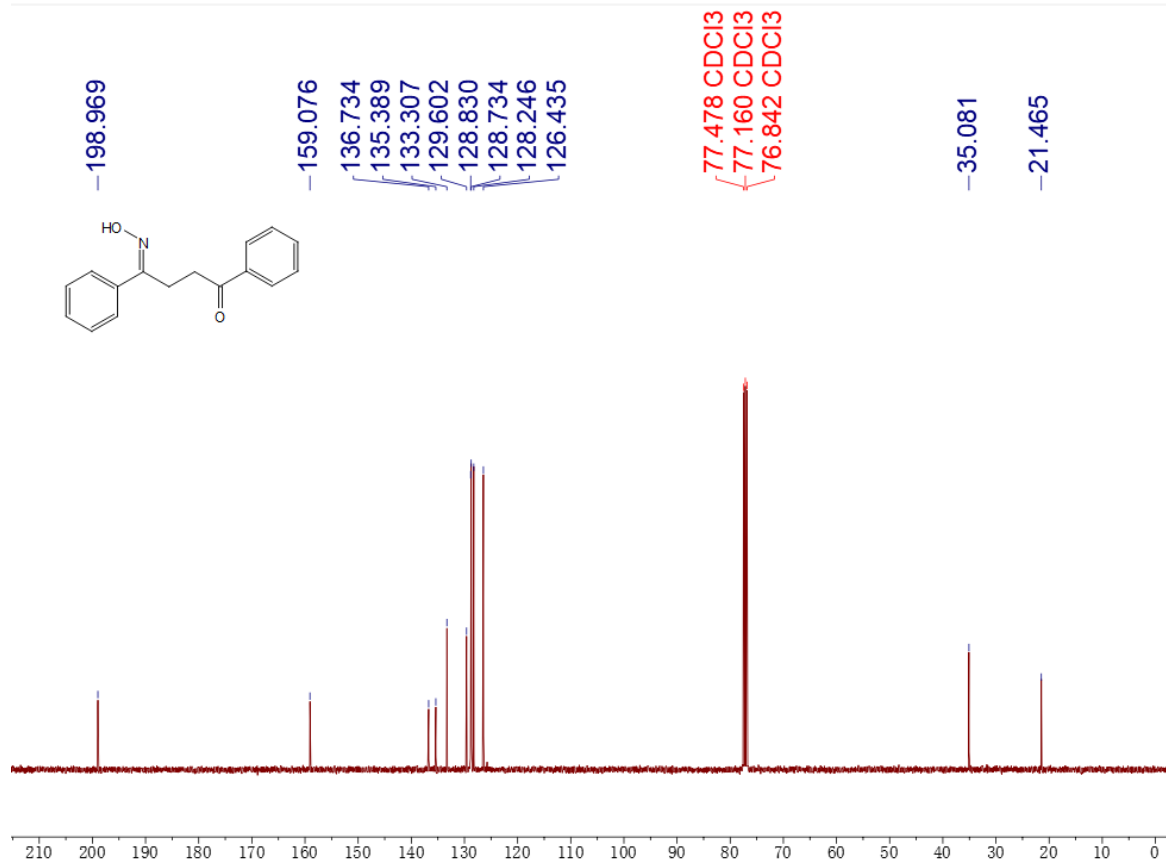

<sup>1</sup>H NMR spectra (400 MHz) in CDCl<sub>3</sub> of compound **16**

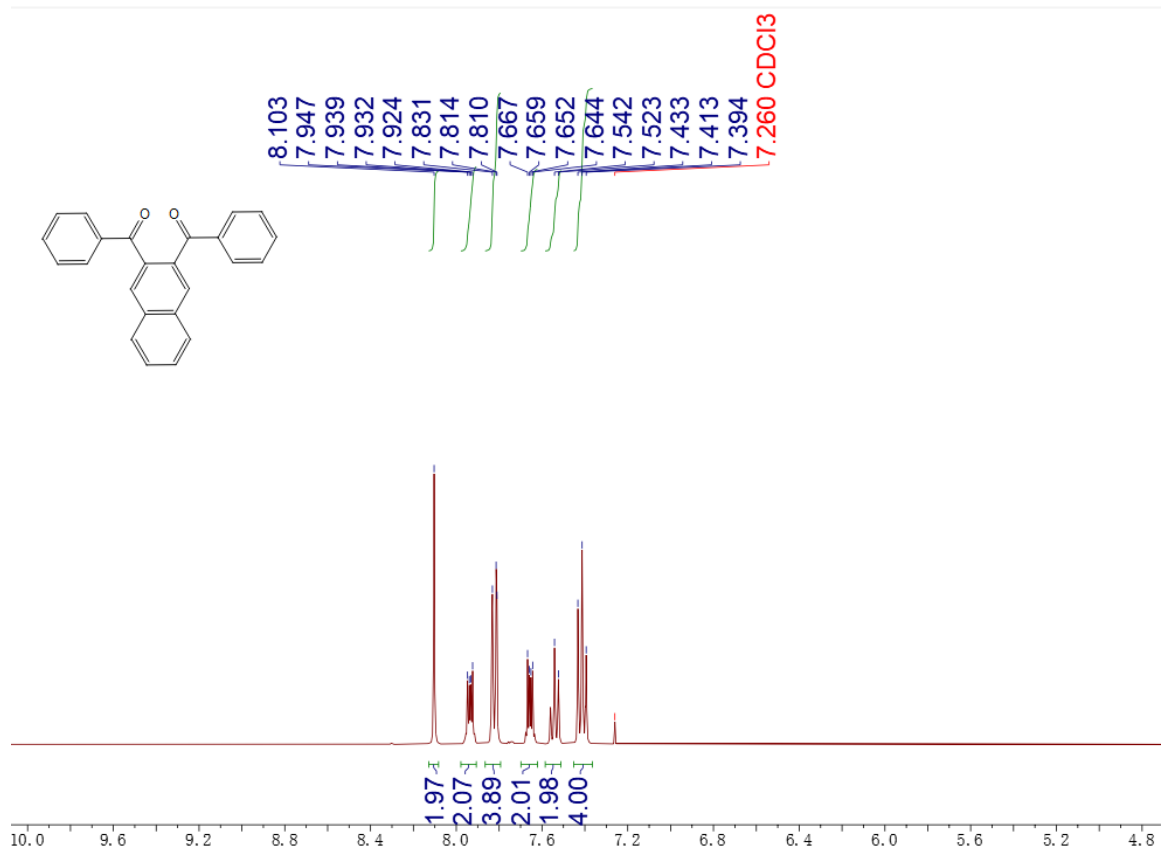

<sup>13</sup>C NMR spectra (400 MHz) in CDCl<sub>3</sub> of compound **16**

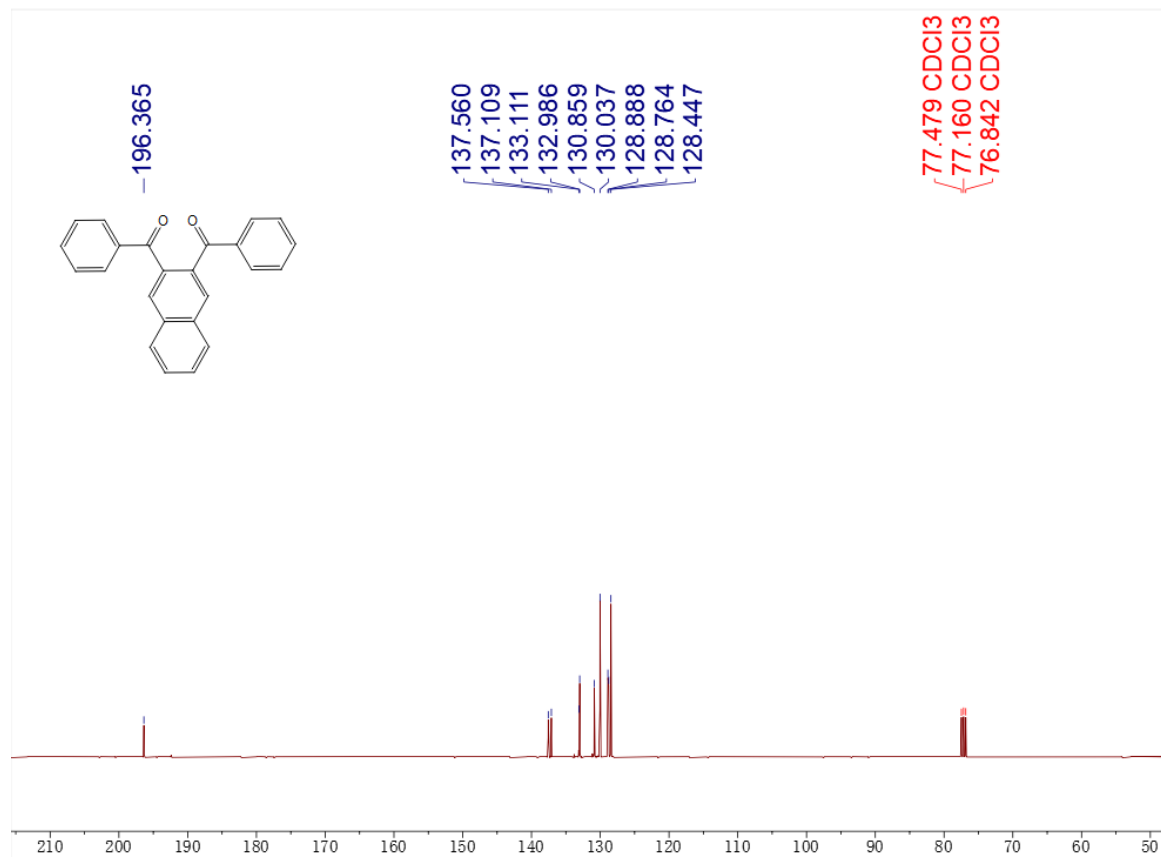



---

## 10. References

- (1) (a) Zhang, Y.; Li, X.; Xu, L.; Xie, X.; Lu, Y.; Zhang, Z. *Org Lett* **2022**, *24*, 7512-7516. (b) Yang, B.; Lu, S.; Wang, Y.; Zhu, S. *Nat Commun* **2022**, *13*, 1858. (c) Schirmacher, R. H. E.; Rösch, D.; Thomas, F. *Tetrahedron* **2021**, *83*. (d) Liu, J.; Lu, L.-Q.; Luo, Y.; Zhao, W.; Sun, P.-C.; Jin, W.; Qi, X.; Cheng, Y.; Xiao, W.-J. *ACS Catal.* **2022**, *12*, 1879-1885. (e) Li, J.-L.; Yang, S.-L.; Dai, Q.-S.; Huang, H.; Jiang, L.; Li, Q.-Z.; Wang, Q.-W.; Zhang, X.; Han, B. *Chinese Chemical Letters* **2023**, *34*. (f) Li, H.-R.; Guo, X.-Y.; Guo, M.-Z.; Liu, K.; Wen, L.-R.; Li, M.; Zhang, L.-B. *Org. Biomol. Chem.* **2023**, *21*, 8646-8650. (g) Da, B.-C.; Wang, Y.-B.; Cheng, J. K.; Xiang, S.-H.; Tan, B. *Angew. Chem. Int. Ed.* **2023**, *62*, e202303128. (h) Chu, Q.; He, G.; Xi, Y.; Wang, P.; Yu, H.; Liu, R.; Zhu, H. *Catal. Commun.* **2018**, *108*, 46-50.
- (2) Ma, Y.; Zhou, Y.; Yu, M.; Fang, C.; Yang, S.; Niu, J. *Chinese Chemical Letters* **2024**, *35*, 109453.
- (3) Chen, J.; Cao, L.; Cheng, Y.; Chen, Z.; Wang, Z.; Chen, Y.; Liu, Z.; Ma, J.; Xie, P. *Water Research* **2024**, *260*, 121959.
- (4) (a) Huang, Y.; Zhang, Q.; Hua, L.-L.; Zhan, L.-W.; Hou, J.; Li, B.-D. *Cell Reports Physical Science* **2022**, *3*, 100994. (b) Hou, J.; Hua, L.-L.; Huang, Y.; Zhan, L.-W.; Li, B.-D. *Chem. Asian J.* **2023**, *18*, e202201092.
- (5) (a) Fang, L.; Jia, S.; Fan, S.; Zhu, J. *Chem. Commun.* **2023**, *59*, 10392-10395. (b) Kong, W.; Yu, C.; An, H.; Song, Q. *Org. Lett.* **2018**, *20*, 349-352. (c) Yu, X.; Huang, N.; Huo, Y.; Li, X.; Liu, Y.; Maruoka, K.; Chen, Q. *Org. Lett.* **2024**, *26*, 565-570.
- (6) (a) Hartmann, A. P.; de Carvalho, M. R.; Bernardes, L. S. C.; Moraes, M. H. d.; de Melo, E. B.; Lopes, C. D.; Steindel, M.; da Silva, J. S.; Carvalho, I. *Eur. J. Med. Chem.* **2017**, *140*, 187-199. (b) Palani, P.; Arumugam, A.; Raja, D.; Muthu, K.; Senadi, G. C. *Chem. Commun.* **2023**, *59*, 11433-11436.
- (7) Liu, Y.; Liu, S.; Li, D.; Zhang, N.; Peng, L.; Ao, J.; Song, C. E.; Lan, Y.; Yan, H. *J. Am. Chem. Soc.* **2019**, *141*, 1150-1159.
- (8) (a) Chacón-Huete, F.; Lasso, J. D.; Szavay, P.; Covone, J.; Forgione, P. *The Journal of Organic Chemistry* **2021**, *86*, 515-524. (b) May, L.; Daniel, S.; Müller, T. J. *J. Organic Chemistry Frontiers* **2020**, *7*, 329-339.
- (9) Wada, Y.; Tsuchihashi, K.; Kanzaki, M.; Hamura, T. *Chemistry – A European Journal* **2023**, *29*, e202302660.
